# Supplementary material for: pH-Dependent transfer hydrogenation or dihydrogen release catalyzed by a [(η6-arene)RuCl(κ2-N,N-dmobpy)]+ complex: a DFT mechanistic understanding
Source: Royal Society of Chemistry journal article supplement (doi:10.1039/c9ra10651k), 2020-01-01
Supplement: c9ra10651k1.pdf [file c9ra10651k1.pdf]

**Supporting Information**  
**For**  
**pH-Dependent Transfer Hydrogenation or Dihydrogen Release**  
**Catalyzed by  $[(\eta^6\text{-arene})\text{RuCl}(\kappa^2\text{-N,N-dmobbpy})]^+$  Complex: A DFT**  
**Mechanistic Understanding**

Chenguang Luo,<sup>a</sup> Longfei Li,<sup>b</sup> Xin Yue,<sup>a</sup> Pengjie Li,<sup>a</sup> Lin Zhang,<sup>a</sup> Zuoyin Yang,<sup>a</sup> Min Pu,<sup>a</sup> Zexing

Cao<sup>c,\*</sup>, Ming Lei<sup>a,c,\*</sup>

<sup>a</sup> State Key Laboratory of Chemical Resource Engineering, Institute of Computational Chemistry, College of Chemistry, Beijing University of Chemical Technology, Beijing, 100029, China

<sup>b</sup> College of Pharmaceutical Science, Hebei University, Baoding, 071002, China

<sup>c</sup> State Key Laboratory of Physical Chemistry of Solid Surfaces, Xiamen University, Xiamen 361005, China

## Table of Contents

|                                                                                                                                                                                                                                       |    |
|---------------------------------------------------------------------------------------------------------------------------------------------------------------------------------------------------------------------------------------|----|
| <b>Figure S1.</b> The free energy profiles along the hydride transfer step by path B. ....                                                                                                                                            | 2  |
| <b>Figure S2.</b> The free energy profiles along the hydride transfer step by path C. ....                                                                                                                                            | 3  |
| <b>Figure S3.</b> The free energy profiles along the hydride transfer step by path D. ....                                                                                                                                            | 4  |
| <b>Figure S4.</b> The free energy profiles of hydrogen release pathway when hydrated proton is $\text{H}_7\text{O}_3^+$ . ....                                                                                                        | 5  |
| <b>Figure S5.</b> The free energy profiles of hydrogen release pathway when proton source is $\text{HCOOH}$ . ...                                                                                                                     | 6  |
| <b>Figure S6.</b> The free energy profiles of TH of ketones catalyzed by cyclometallated ruthenium single-site complex when chose different basis set to describe Ru. ....                                                            | 7  |
| <b>Figure S7.</b> The free energy profiles of the formation of metal hydride 5 when the dissociation of one 4-methylpyridine. ....                                                                                                    | 8  |
| <b>Figure S8.</b> The free energy profiles of the formation of $\text{PhMeCOH}_5\text{O}_2^+$ and $\text{PhMeCOH}_3\text{O}^+$ . ....                                                                                                 | 9  |
| <b>Figure S9.</b> Relationship between APT charge of $\text{C}^1$ atom and free energy barriers of hydride transfer pathway. ....                                                                                                     | 10 |
| <b>Figure S10.</b> Relationship between APT charge of $\text{H}^3$ atom and free energy barriers of hydrogen release pathway. ....                                                                                                    | 11 |
| <b>Table S1.</b> The APT charge of $\text{H}^1$ atom in hydrated protons $\text{H}_3\text{O}^+$ , $\text{H}_5\text{O}_2^+$ and $\text{H}_7\text{O}_3^+$ . ....                                                                        | 12 |
| <b>Table S2.</b> The calculated electronic energies ( $E$ , in a. u.), free Gibbs energies ( $G$ , in a. u.), relative electronic energies ( $\Delta E$ , kcal/mol), and relative Gibbs energies ( $\Delta G$ , kcal/mol, 298K). .... | 13 |
| <b>Table S3.</b> Calculated imaginary frequencies of transition states at $\omega\text{B97X-D/BSI}$ level. ....                                                                                                                       | 14 |

Figure S11. Typical geometric structure diagram.....15  
 Atomic Cartesian coordinates of intermediates and transition states (unit: Å).....16

**Figure S1. The free energy profiles along the hydride transfer step by path B.**

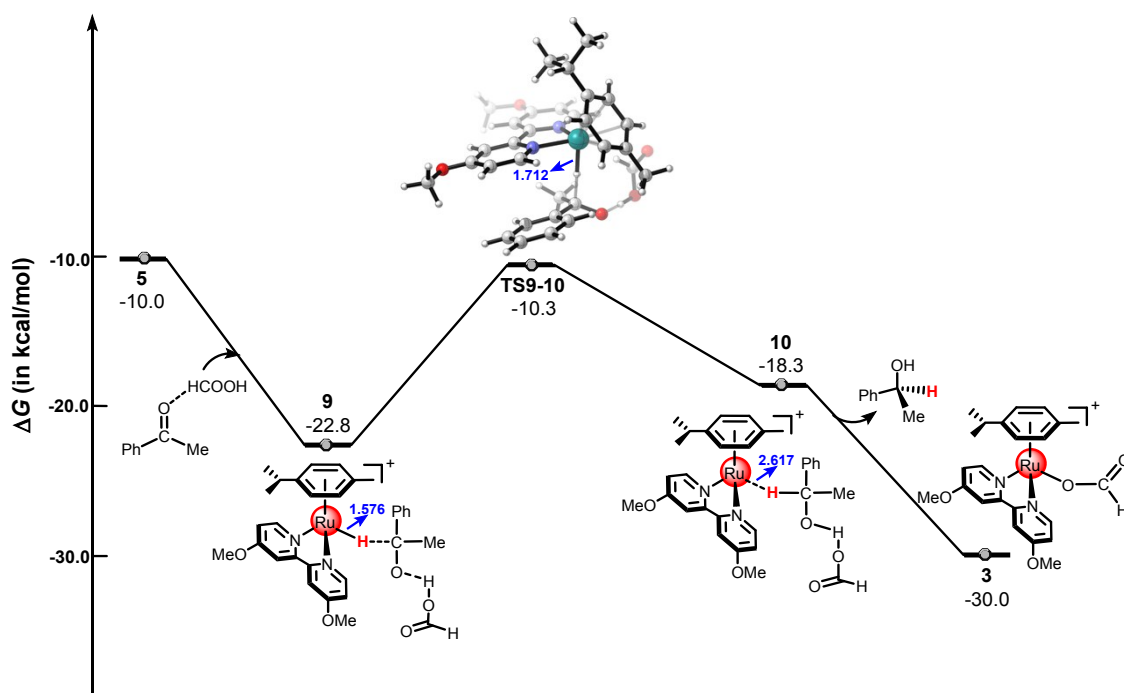

**Path B:** In this pathway, the ketone substrate could be stabilized with formic acid through hydrogen bond. Firstly, the ketone stabilized with formic acid coordinates with metal hydride **5** to form intermediate **9**. Then the hydride is transferred from Ru center to the carbon atom of ketone via **TS9-10** with an energy barrier of 12.5 kcal/mol. Subsequently, intermediate **10** is formed, the free energy of complex **10** is -18.3 kcal/mol. The free energy profiles along path B are shown in Figure S1, in this pathway, the energy barrier is 12.5 kcal/mol from **9** to **TS9-10**. As a result, we can conclude that path B is less favorable than path A.

**Figure S2. The free energy profiles along the hydride transfer step by path C.**

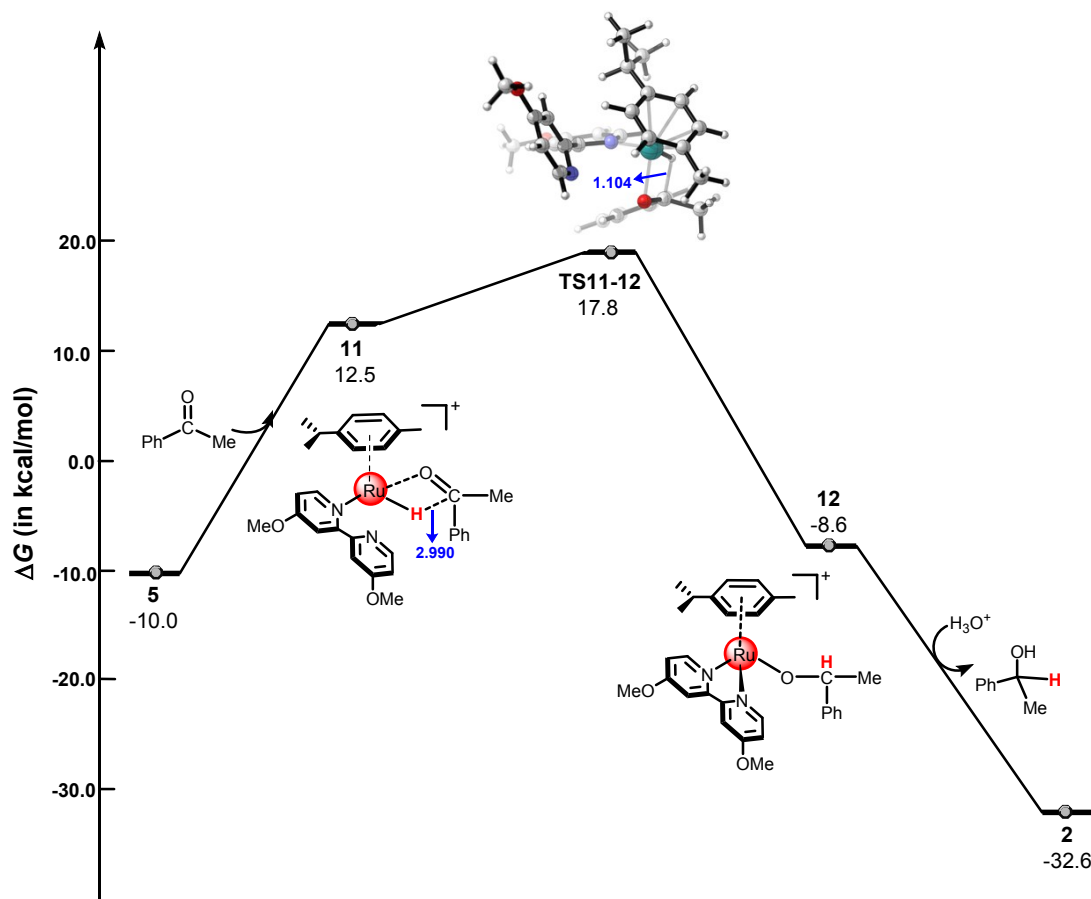

**Path C:** In this pathway, the ketone substrate is coordinated to the Ru atom during the hydride transfer by inner-sphere mechanism. As shown in Figure S2, the oxygen atom of acetophenone forms the Ru-O bond with Ru center of complex **5** firstly, resulting in the dissociation of one 4-methylpyridine to form complex **11** with a high energy barrier of 22.5 kcal/mol. Subsequently, the hydride transfers to carbon atom of ketone through **TS11-12**, which owing an energy barrier of 5.3 kcal/mol. From **11** to **TS11-12**, the C-H distance decreases from 2.990 Å to 1.104 Å, indicating that the C-H bond is formed. Path C has an energy barrier of 27.8 kcal/mol, which is 22.9 kcal/mol higher than that of Path A. As a result, we can conclude that path C is less favorable than path A.

**Figure S3. The free energy profiles along the hydride transfer step by path D.**

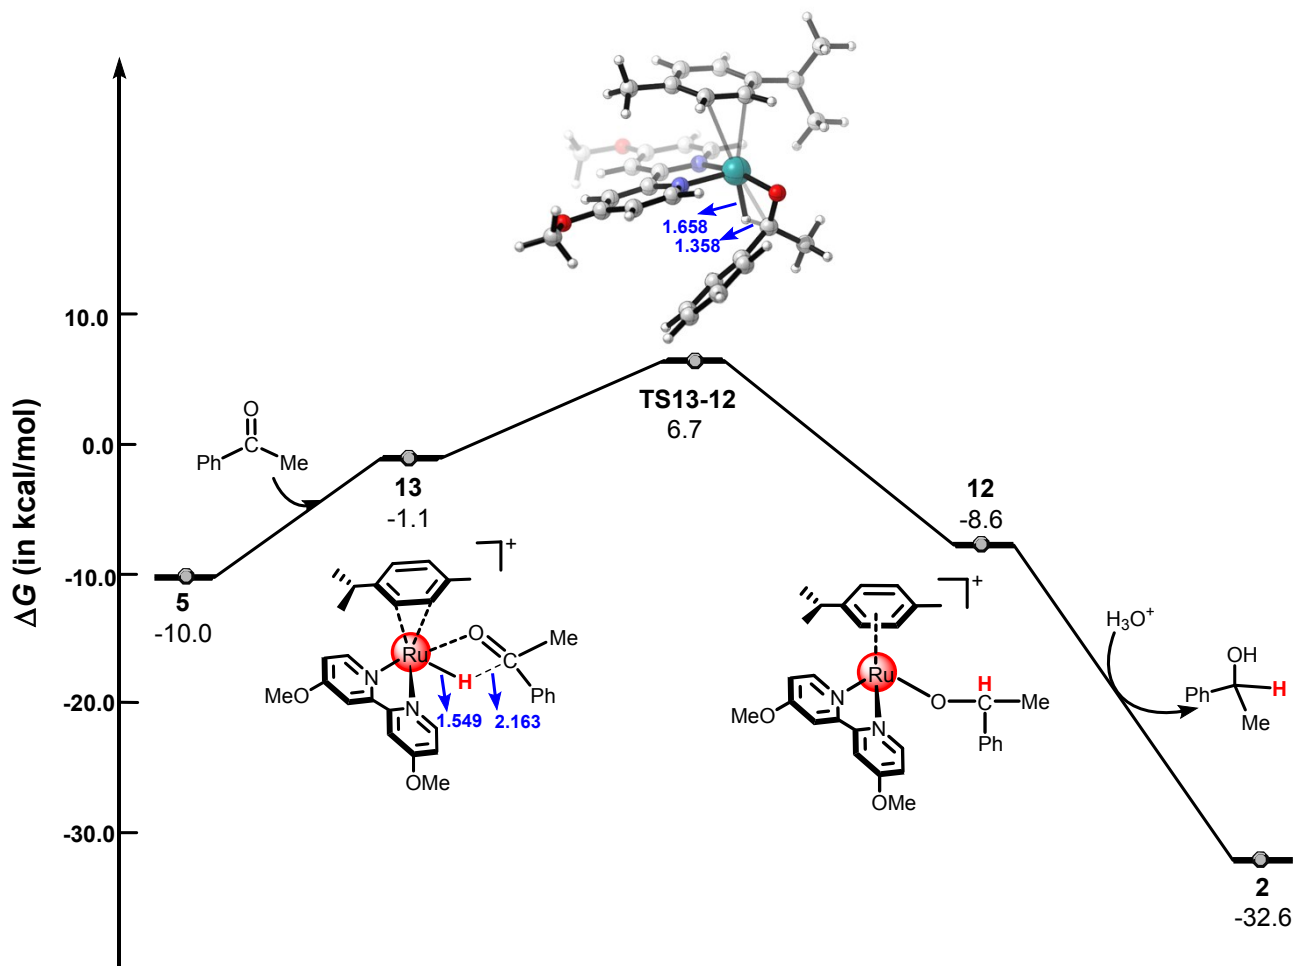

**Path D:** In this pathway, the ketone substrate also coordinates to the Ru atom during the hydride transfer by inner-sphere mechanism. Meanwhile, the arene ring occurs the ring slippage from  $\eta^6$ -coordination to  $\eta^2$ -coordination to form complex **13**. Then the hydride transfer to the carbon atom of ketone through **TS13-12**, which owing an energy barrier of 16.7 kcal/mol (see Figure S3). Obviously, Path A is more favorable than Path D.

**Figure S4. The free energy profiles of hydrogen release pathway when hydrated proton is  $\text{H}_7\text{O}_3^+$ .**

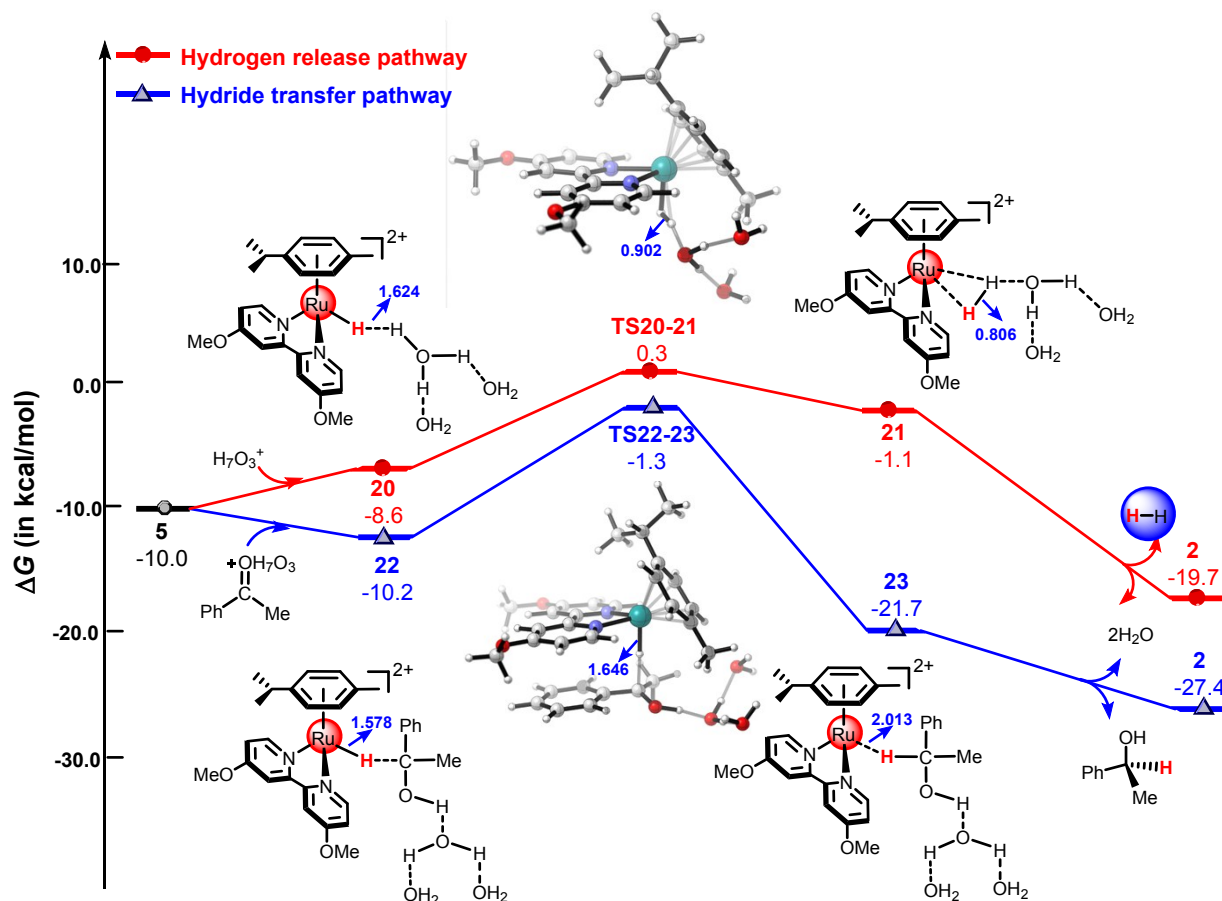

Figure S4 shows the free energy profiles of dihydrogen release pathway and hydride transfer pathway mediated by  $\text{H}_7\text{O}_3^+$ , the energy barrier of the dihydrogen release pathway is 10.3 kcal/mol. Interestingly, the reaction along the hydride transfer pathway is 8.9 kcal/mol. In general, the dihydrogen release pathway driven by this cyclometallated TM single-site system is less favorable than the hydride transfer pathway under acidic condition. Obviously, the hydride transfer pathway via outer-sphere mechanism is more favorable than the hydrogen release pathway for the reaction mediated by hydrated proton  $\text{H}_7\text{O}_3^+$ .

**Figure S5. The free energy profiles of hydrogen release pathway when proton source is HCOOH.**

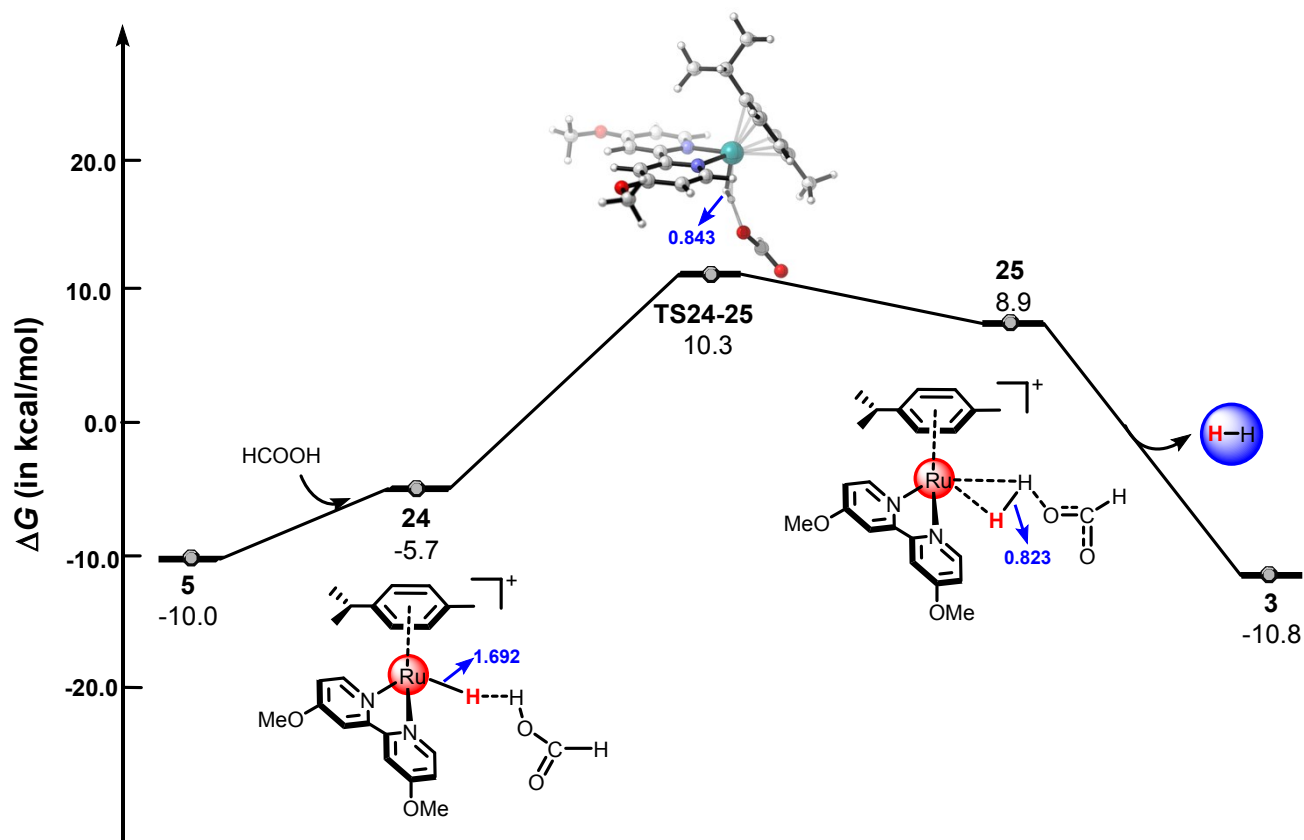

As shown in Figure S5, **TS24-25** with formic acid as proton source has an activation energy barrier of 20.3 kcal/mol, 10.9 kcal/mol higher than that of **TS14-15** with the hydrated proton  $\text{H}_3\text{O}_2^+$ . The calculation results suggest that the hydrogen release pathway is more favorable along  $\text{H}_3\text{O}_2^+$  as proton source than formic acid as proton source.

**Figure S6. The free energy profiles of TH of ketones catalyzed by cyclometallated ruthenium single-site complex when chose different basis set to describe Ru.**

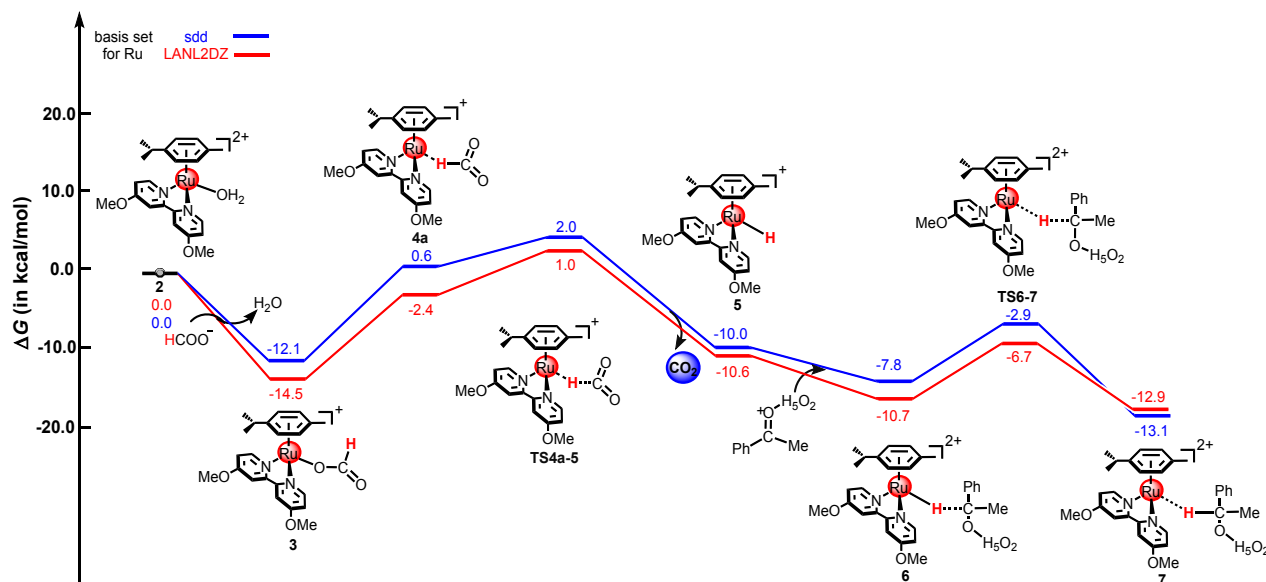

When the effective core potential (ECP) of Ru with a double- $\zeta$  valence basis set (LANL2DZ) was chosen to describe Ru, the metal hydride formation is the rate-determining step with a free energy barrier of 14.1 kcal/mol. When the sdd basis set was chosen to describe Ru, the metal hydride formation is the rate-determining step with a free energy barrier of 15.5 kcal/mol (see Figure S6). The difference of calculated results between the two basis set is little which is only 1.4 kcal/mol.

**Figure S7. The free energy profiles of the formation of metal hydride 5 when the dissociation of one 4-methylpyridine.**

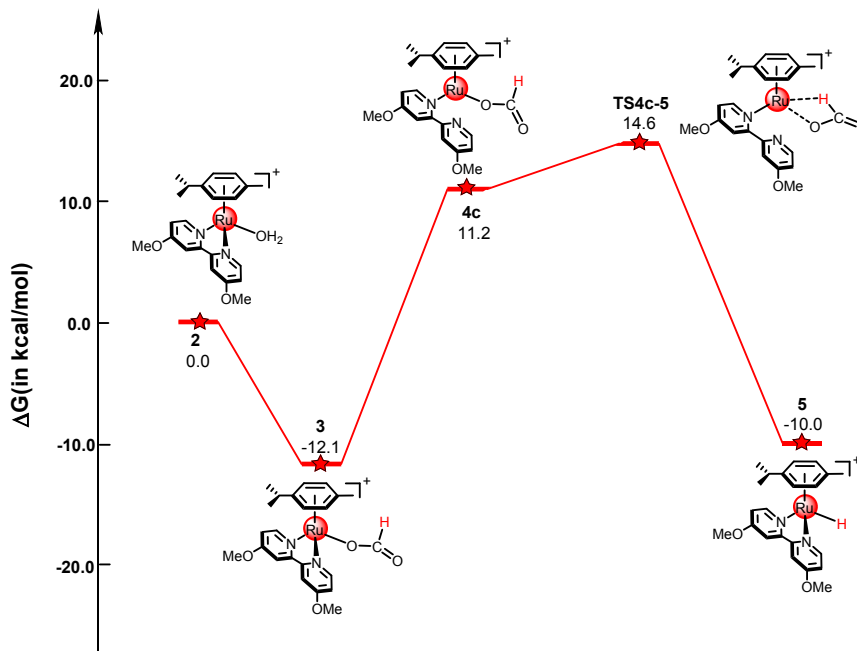

As shown in Figure S7, one 4-methylpyridine is dissociated to provide a vacant coordinate site to form complex **4c** firstly, this process is exothermic by 23.3 kcal/mol. Subsequently, the hydride transfers to Ru through **TS4c-5**, which owes an energy barrier of 26.7 kcal/mol. This high energy barrier implies that this pathway is less favorable than the ion-pair mechanism.



**Figure S8. The free energy profiles of the formation of  $\text{PhMeCOH}_5\text{O}_2^+$  and  $\text{PhMeCOH}_3\text{O}^+$ .**

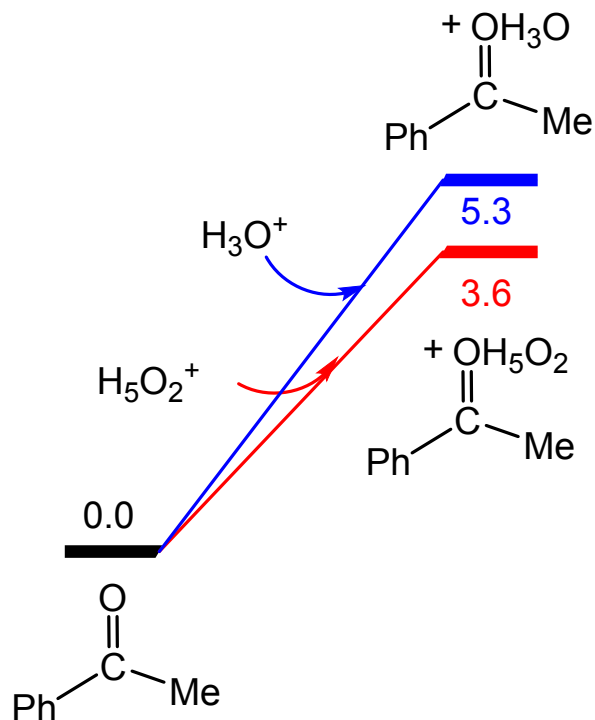

The reactions of  $\text{PhMeCO} + \text{H}_5\text{O}_2^+ \rightarrow \text{PhMeCOH}_5\text{O}_2^+$  and  $\text{PhMeCO} + \text{H}_3\text{O}^+ \rightarrow \text{PhMeCOH}_3\text{O}^+$  as shown in Figure S8, these processes are endergonic by 3.6 and 5.3 kcal/mol, respectively.

**Figure S9. Relationship between APT charge of C<sup>1</sup> atom and free energy barriers of hydride transfer pathway.**

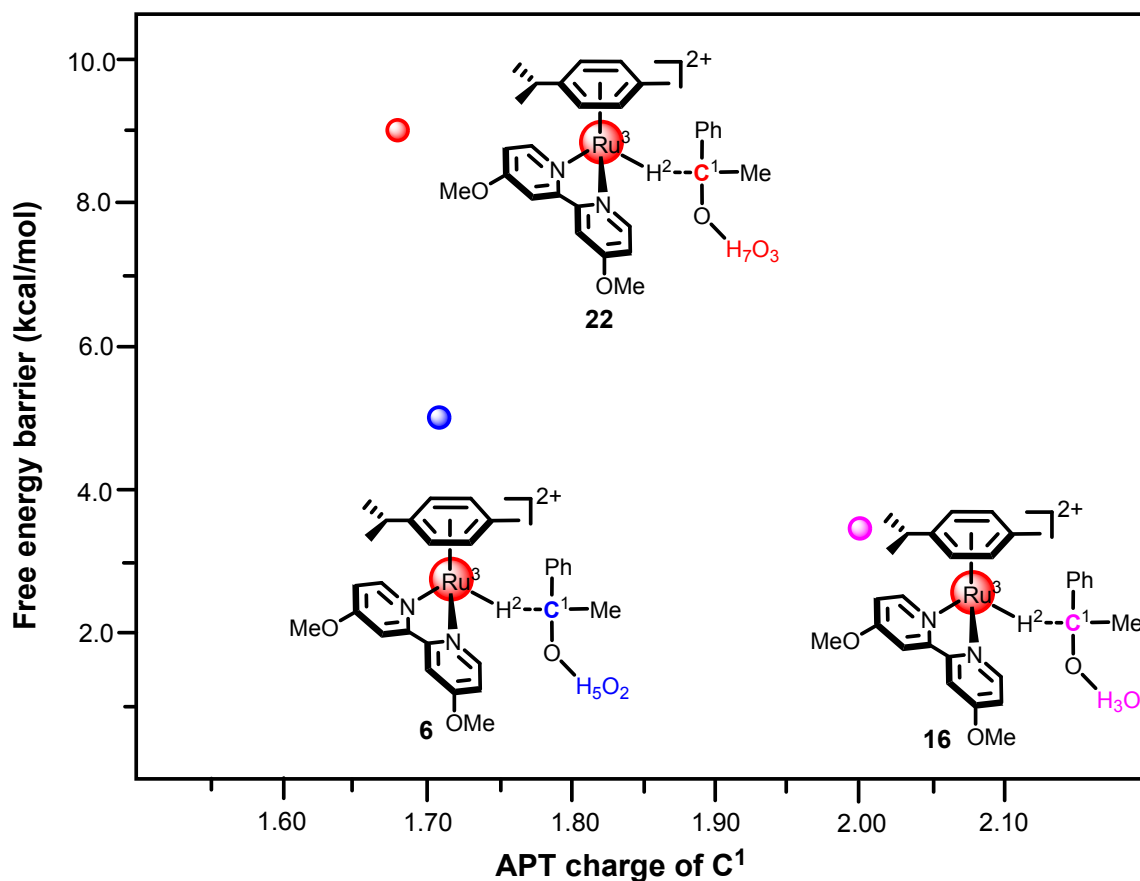

As shown in Figure S9, the APT charges of C<sup>1</sup> in complex **22**, **6** and **16** are increasing in turn, however, the energy barriers of these pathways are decreasing in turn. It indicates that H<sub>3</sub>O<sup>+</sup> hydrated proton contributes more charges to the carbon atom of ketone. The calculated results show that the hydride transfer pathway for the reaction mediated by H<sub>3</sub>O<sup>+</sup> is more favorable than those mediated by H<sub>5</sub>O<sub>2</sub><sup>+</sup> or H<sub>7</sub>O<sub>3</sub><sup>+</sup>.

**Figure S10. Relationship between APT charge of H<sup>3</sup> atom and free energy barriers of hydrogen release pathway.**

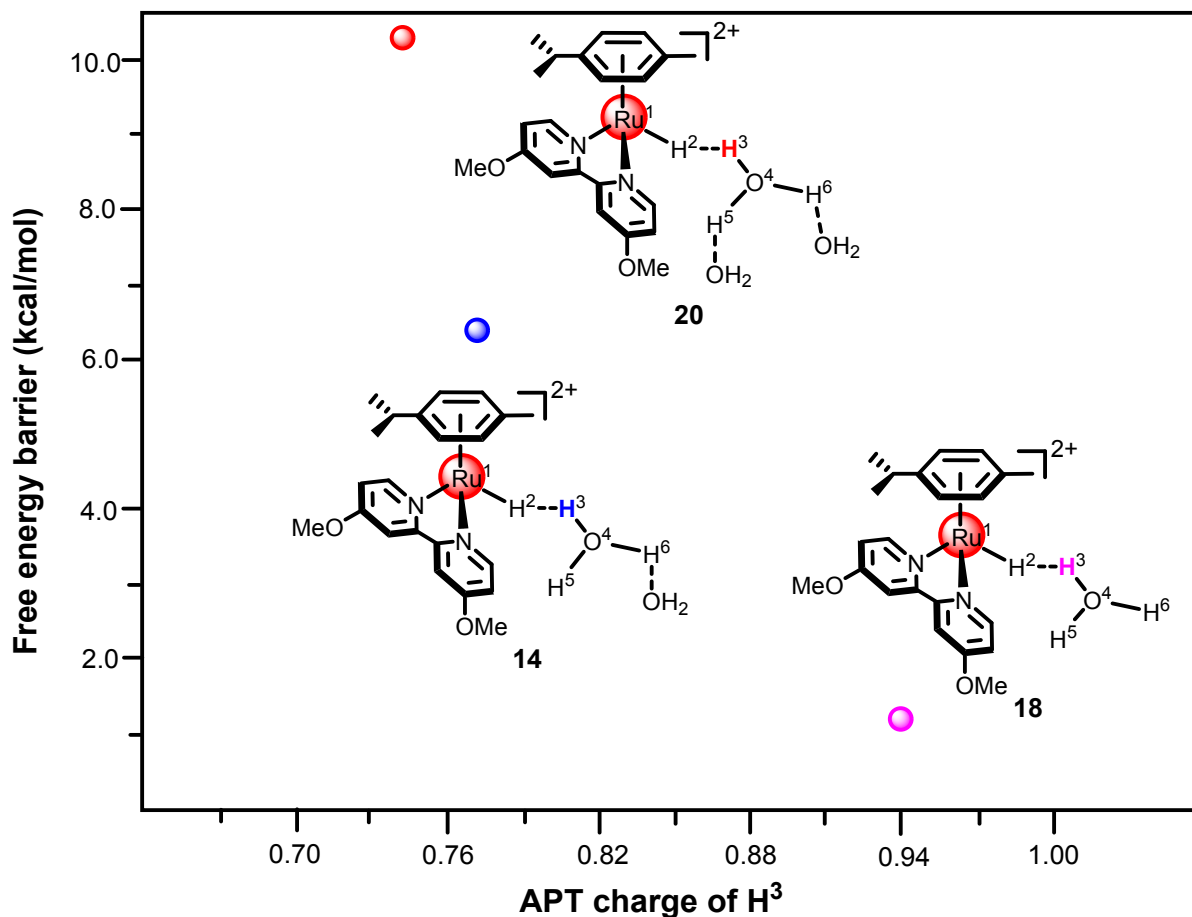

As shown in Figure S10, the APT charges of H<sup>3</sup> in complex **20**, **14** and **18** are increasing in turn, however, the energy barriers of these pathways are decreasing in turn. This means that H<sub>3</sub>O<sup>+</sup> has stronger acidity. The calculated results show that the dihydrogen release pathway for the reaction mediated by H<sub>3</sub>O<sup>+</sup> is more favorable than those mediated by H<sub>5</sub>O<sub>2</sub><sup>+</sup> or H<sub>7</sub>O<sub>3</sub><sup>+</sup>.

**Table S1. The APT charge of H<sup>1</sup> atom in hydrated protons H<sub>3</sub>O<sup>+</sup>, H<sub>5</sub>O<sub>2</sub><sup>+</sup> and H<sub>7</sub>O<sub>3</sub><sup>+</sup>.**

|                                   |                                                                                   |                                                                                   |                                                                                     |
|-----------------------------------|-----------------------------------------------------------------------------------|-----------------------------------------------------------------------------------|-------------------------------------------------------------------------------------|
| Hydrated proton                   | 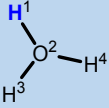 |  |  |
| APT charge of H <sup>1</sup> atom | 0.51                                                                              | 0.44                                                                              | 0.40                                                                                |

**Table S2. The calculated electronic energies ( $E$ , in a. u.), free Gibbs energies ( $G$ , in a. u.), relative electronic energies ( $\Delta E$ , kcal/mol), and relative Gibbs energies ( $\Delta G$ , kcal/mol, 298K).**

| Complex                                                           | $G$          | $E$            | $\Delta E$ | $\Delta G$ |
|-------------------------------------------------------------------|--------------|----------------|------------|------------|
| CO <sub>2</sub>                                                   | -188.525108  | -188.51598911  | \          | \          |
| H <sub>2</sub> O                                                  | -76.407070   | -76.41101011   | \          | \          |
| H <sub>3</sub> O <sup>+</sup>                                     | -76.823038   | -76.83965507   | \          | \          |
| H <sub>5</sub> O <sub>2</sub> <sup>+</sup>                        | -153.244176  | -153.27668220  | \          | \          |
| H <sub>7</sub> O <sub>3</sub> <sup>+</sup>                        | -229.650596  | -229.70612822  | \          | \          |
| HCOOH                                                             | -189.691831  | -189.70231192  | \          | \          |
| HCOO <sup>-</sup>                                                 | -189.238205  | -189.23601139  | \          | \          |
| OH <sup>-</sup>                                                   | -75.880497   | -75.87298358   | \          | \          |
| H <sub>2</sub>                                                    | -1.173712    | -1.17238411    | \          | \          |
| PhCOCH <sub>3</sub>                                               | -384.678258  | -384.78399771  | \          | \          |
| PhCOCH <sub>3</sub> ...HCOOH                                      | -574.356005  | -574.49112237  | \          | \          |
| PhCOCH <sub>3</sub> ...H <sub>3</sub> O <sup>+</sup>              | -461.509704  | -461.65022147  | \          | \          |
| PhCOCH <sub>3</sub> ...H <sub>5</sub> O <sub>2</sub> <sup>+</sup> | -537.916675  | -538.07962941  | \          | \          |
| PhCOCH <sub>3</sub> ...H <sub>7</sub> O <sub>3</sub> <sup>+</sup> | -614.325414  | -614.50620610  | \          | \          |
| Phenylethanol                                                     | -385.859331  | -385.98929721  | \          | \          |
| <b>2</b>                                                          | -1283.297302 | -1283.71544664 | 0.0        | 0.0        |
| <b>3</b>                                                          | -1396.147723 | -1396.55992586 | -12.2      | -12.1      |
| <b>4a</b>                                                         | -1396.127545 | -1396.53901329 | 0.9        | 0.6        |
| <b>4b</b>                                                         | -1396.134620 | -1396.54505987 | -2.9       | -3.9       |
| <b>TS4a-5</b>                                                     | -1396.125275 | -1396.53244412 | 5.0        | 2.0        |
| <b>TS4b-5</b>                                                     | -1396.098258 | -1396.50673372 | 21.2       | 20.1       |
| <b>5</b>                                                          | -1207.619209 | -1208.02037691 | 2.6        | -10.0      |
| <b>6</b>                                                          | -1745.538164 | -1746.12596623 | -25.6      | -7.8       |
| <b>TS6-7</b>                                                      | -1745.530284 | -1746.11695319 | -19.9      | -2.9       |
| <b>7</b>                                                          | -1745.548222 | -1746.13852352 | -33.5      | -14.1      |
| <b>8</b>                                                          | -1282.837906 | -1283.24155288 | 12.1       | 18.4       |
| <b>8'</b>                                                         | -1282.837906 | -1283.24155288 | -40.2      | -42.1      |
| <b>9</b>                                                          | -1781.995596 | -1782.55672512 | -25.8      | -22.8      |
| <b>TS9-10</b>                                                     | -1781.975608 | -1782.53698596 | -13.1      | -10.3      |
| <b>10</b>                                                         | -1781.988490 | -1782.55745103 | -26.3      | -18.3      |
| <b>11</b>                                                         | -1592.261620 | -1592.79101903 | 11.0       | 12.5       |
| <b>TS11-12</b>                                                    | -1592.253225 | -1592.78133189 | 17.1       | 17.8       |

|         |              |                |       |       |
|---------|--------------|----------------|-------|-------|
| 12      | -1592.295309 | -1592.83277478 | -15.2 | -8.6  |
| 13      | -1592.283316 | -1592.81551942 | -4.4  | -1.1  |
| TS13-12 | -1592.270890 | -1592.80000160 | 5.3   | 6.7   |
| 14      | -1360.858805 | -1361.31516122 | -8.8  | -7.1  |
| TS14-15 | -1360.848400 | -1361.30291643 | -1.1  | -0.6  |
| 15      | -1360.856080 | -1361.30970441 | -5.4  | -5.4  |
| 16      | -1669.130987 | -1669.69517204 | -29.5 | -6.0  |
| TS16-17 | -1669.125403 | -1669.69170204 | -27.3 | -2.5  |
| 17      | -1669.148003 | -1669.71865057 | -44.2 | -16.7 |
| 18      | -1284.444144 | -1284.88054613 | -10.3 | -11.2 |
| TS18-19 | -1284.446841 | -1284.87630717 | -9.9  | -10.1 |
| 19      | -1284.455409 | -1284.88705326 | -14.4 | -18.2 |
| 20      | -1437.267522 | -1437.74786123 | -23.4 | -8.6  |
| TS20-21 | -1437.253417 | -1437.72831119 | -11.1 | 0.3   |
| 21      | -1437.255509 | -1437.73082754 | -12.7 | -1.1  |
| 22      | -1821.944921 | -1822.55320593 | -14.1 | -10.2 |
| TS22-23 | -1821.930703 | -1822.54115003 | -6.5  | -1.3  |
| 24      | -1397.313345 | -1397.74679124 | -12.5 | -5.7  |
| TS24-25 | -1397.287870 | -1397.71649807 | 6.5   | 10.3  |
| 25      | -1397.290179 | -1397.71664883 | 6.4   | 8.9   |

**Table S3. Calculated imaginary frequencies of transition states at  $\omega$ B97X-D/BSI level.**

| Complex | Imaginary frequencies |
|---------|-----------------------|
| TS4a-4  | 558.66i               |
| TS4b-4  | 254.59i               |
| TS6-7   | 416.93i               |
| TS9-10  | 542.38i               |
| TS11-12 | 507.19i               |
| TS13-12 | 188.50i               |
| TS14-15 | 920.23i               |
| TS16-17 | 337.70i               |
| TS18-19 | 997.06i               |
| TS20-21 | 672.18i               |
| TS22-23 | 455.20i               |
| TS24-25 | 44.44i                |

**Figure S11. Typical geometric structure diagram.**

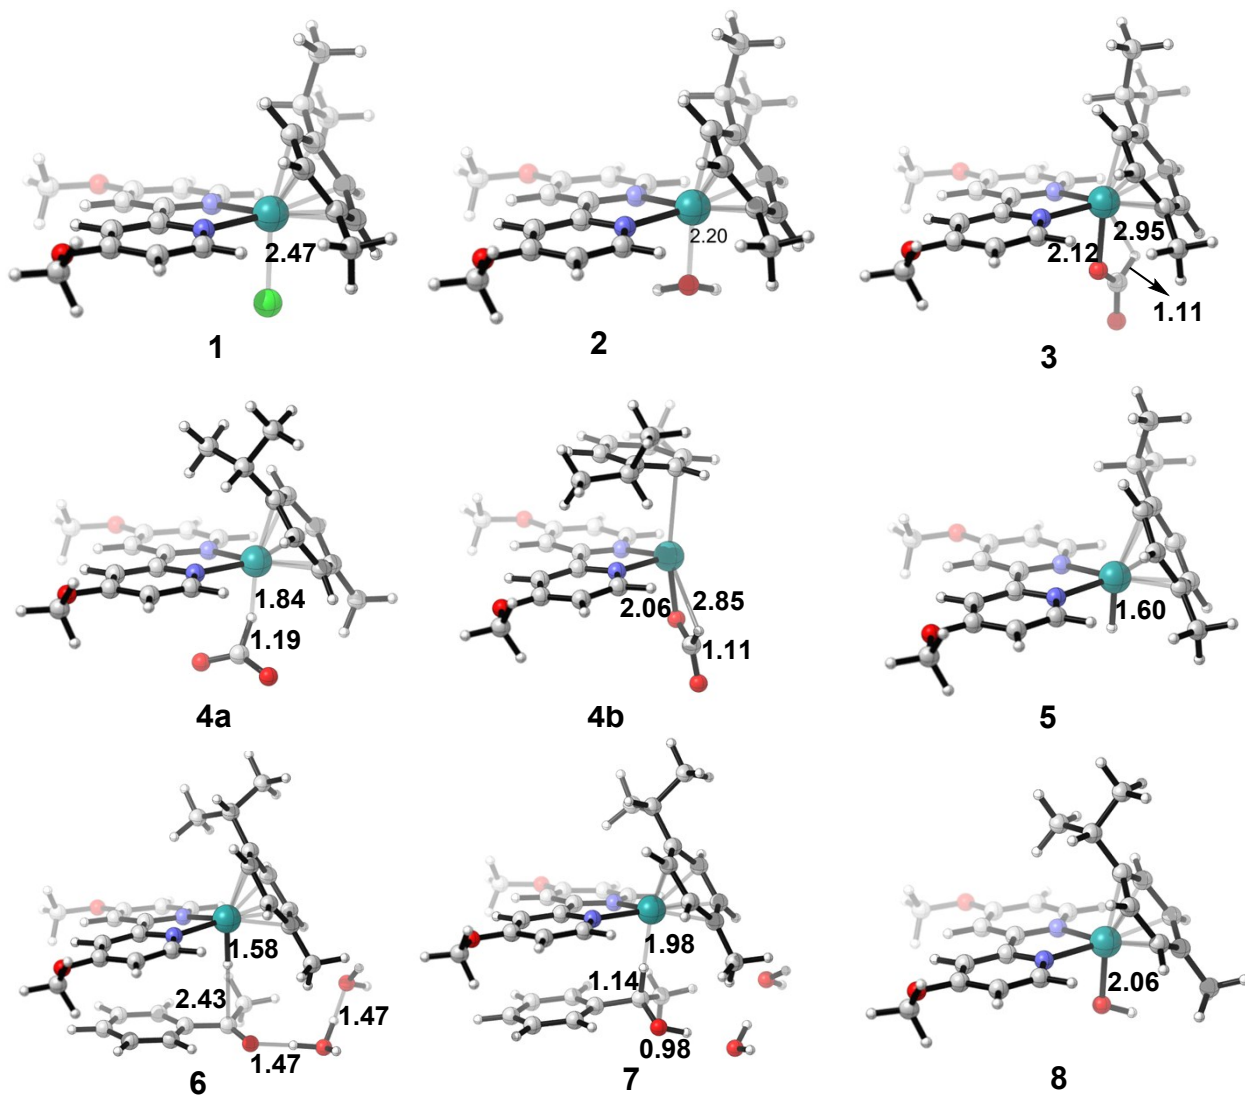

**Atomic Cartesian coordinates of intermediates and transition states (unit: Å).**

2

| -----                   |              |              |              |
|-------------------------|--------------|--------------|--------------|
| Coordinates (Angstroms) |              |              |              |
|                         | X            | Y            | Z            |
| -----                   |              |              |              |
| 44                      | 0.948762000  | -0.726993000 | -0.458109000 |
| 7                       | 0.089909000  | 1.203478000  | -0.431265000 |
| 7                       | -1.097393000 | -1.074573000 | -0.073743000 |
| 8                       | -1.651000000 | 4.923733000  | -0.304185000 |
| 8                       | -5.100226000 | -1.441541000 | 0.794376000  |
| 6                       | 0.769913000  | 2.319114000  | -0.746314000 |
| 1                       | 1.799778000  | 2.179952000  | -1.045033000 |
| 6                       | 0.203064000  | 3.570846000  | -0.707986000 |
| 1                       | 0.782569000  | 4.448999000  | -0.964189000 |
| 6                       | -1.142745000 | 3.688987000  | -0.337745000 |
| 6                       | -1.865914000 | 2.527907000  | -0.048825000 |
| 1                       | -2.915300000 | 2.571890000  | 0.206626000  |
| 6                       | -1.216832000 | 1.304838000  | -0.115583000 |
| 6                       | -3.025759000 | 5.086275000  | 0.053210000  |
| 1                       | -3.675235000 | 4.576097000  | -0.663721000 |
| 1                       | -3.211643000 | 6.158434000  | 0.020405000  |
| 1                       | -3.209896000 | 4.710922000  | 1.063714000  |
| 6                       | -1.894130000 | 0.009356000  | 0.093201000  |
| 6                       | -3.235532000 | -0.115093000 | 0.387600000  |
| 1                       | -3.872226000 | 0.749723000  | 0.524871000  |
| 6                       | -3.797103000 | -1.393147000 | 0.505039000  |
| 6                       | -2.977977000 | -2.507364000 | 0.305144000  |
| 1                       | -3.347062000 | -3.522298000 | 0.367601000  |
| 6                       | -1.642077000 | -2.293433000 | 0.020110000  |
| 1                       | -0.979475000 | -3.133424000 | -0.144370000 |
| 6                       | -5.716414000 | -2.725541000 | 0.922079000  |
| 1                       | -5.646227000 | -3.281874000 | -0.016791000 |
| 1                       | -6.761598000 | -2.527258000 | 1.153537000  |
| 1                       | -5.257448000 | -3.294194000 | 1.735564000  |
| 6                       | 1.923766000  | -0.940997000 | 1.509981000  |
| 1                       | 1.516636000  | -0.589093000 | 2.450013000  |
| 6                       | 1.559331000  | -2.224904000 | 1.034168000  |
| 1                       | 0.855358000  | -2.817792000 | 1.609283000  |
| 6                       | 2.021904000  | -2.720073000 | -0.212396000 |
| 6                       | 2.807783000  | -1.836878000 | -0.992503000 |
| 1                       | 3.070541000  | -2.123624000 | -2.005628000 |



|   |              |              |              |
|---|--------------|--------------|--------------|
| 6 | 3.217972000  | -0.566037000 | -0.516878000 |
| 1 | 3.818446000  | 0.064125000  | -1.159075000 |
| 6 | 2.808816000  | -0.112628000 | 0.759741000  |
| 6 | 3.241830000  | 1.220647000  | 1.341269000  |
| 6 | 4.186616000  | 2.017343000  | 0.443040000  |
| 6 | 3.911348000  | 0.977946000  | 2.704308000  |
| 1 | 2.329801000  | 1.805524000  | 1.512544000  |
| 1 | 3.772821000  | 2.221649000  | -0.547310000 |
| 1 | 4.403277000  | 2.979352000  | 0.914537000  |
| 1 | 5.136028000  | 1.488179000  | 0.308912000  |
| 1 | 3.241760000  | 0.487318000  | 3.414683000  |
| 1 | 4.806081000  | 0.357878000  | 2.587322000  |
| 1 | 4.216084000  | 1.935168000  | 3.136022000  |
| 6 | 1.657523000  | -4.085111000 | -0.713417000 |
| 1 | 2.489645000  | -4.773232000 | -0.534492000 |
| 1 | 0.781658000  | -4.477820000 | -0.192823000 |
| 1 | 1.457796000  | -4.066427000 | -1.787121000 |
| 8 | 0.281936000  | -0.705021000 | -2.559496000 |
| 1 | 1.042066000  | -0.478424000 | -3.110846000 |
| 1 | -0.355354000 | 0.005940000  | -2.711406000 |

3

-----  
Coordinates (Angstroms)

|    | X            | Y            | Z            |
|----|--------------|--------------|--------------|
| 44 | -0.976657000 | -0.677927000 | 0.217669000  |
| 7  | -0.020551000 | 1.199023000  | 0.293212000  |
| 7  | 1.039575000  | -1.122929000 | -0.193451000 |
| 8  | 1.937776000  | 4.814381000  | 0.358726000  |
| 8  | 5.045250000  | -1.693863000 | -0.919428000 |
| 6  | -0.638000000 | 2.337775000  | 0.648673000  |
| 1  | -1.681682000 | 2.249368000  | 0.919972000  |
| 6  | 0.002778000  | 3.554521000  | 0.678722000  |
| 1  | -0.528588000 | 4.453743000  | 0.964514000  |
| 6  | 1.358461000  | 3.609237000  | 0.332469000  |
| 6  | 2.016091000  | 2.422003000  | -0.000464000 |
| 1  | 3.069938000  | 2.415223000  | -0.241904000 |
| 6  | 1.294726000  | 1.237138000  | 0.000739000  |
| 6  | 3.317483000  | 4.914765000  | 0.001283000  |
| 1  | 3.942114000  | 4.340961000  | 0.691751000  |
| 1  | 3.563431000  | 5.972532000  | 0.077417000  |
| 1  | 3.478392000  | 4.572286000  | -1.024979000 |
| 6  | 1.903266000  | -0.083212000 | -0.264280000 |
| 6  | 3.246773000  | -0.274968000 | -0.515178000 |
| 1  | 3.941703000  | 0.553485000  | -0.572006000 |

|   |              |              |              |
|---|--------------|--------------|--------------|
| 6 | 3.734276000  | -1.577514000 | -0.682311000 |
| 6 | 2.842533000  | -2.647832000 | -0.579460000 |
| 1 | 3.152946000  | -3.678980000 | -0.682059000 |
| 6 | 1.511246000  | -2.366790000 | -0.332258000 |
| 1 | 0.791074000  | -3.170011000 | -0.232530000 |
| 6 | 5.590951000  | -3.008222000 | -1.054827000 |
| 1 | 5.442038000  | -3.583327000 | -0.136528000 |
| 1 | 6.655656000  | -2.866768000 | -1.232463000 |
| 1 | 5.140783000  | -3.529866000 | -1.904156000 |
| 6 | -1.916683000 | -0.998245000 | -1.788420000 |
| 1 | -1.440433000 | -0.831076000 | -2.746212000 |
| 6 | -1.738212000 | -2.252530000 | -1.142771000 |
| 1 | -1.111374000 | -2.999051000 | -1.620017000 |
| 6 | -2.278694000 | -2.523361000 | 0.132546000  |
| 6 | -2.986098000 | -1.460266000 | 0.766256000  |
| 1 | -3.324054000 | -1.590858000 | 1.789305000  |
| 6 | -3.187014000 | -0.216440000 | 0.137879000  |
| 1 | -3.703616000 | 0.563975000  | 0.679995000  |
| 6 | -2.655427000 | 0.035956000  | -1.164010000 |
| 6 | -2.830014000 | 1.375355000  | -1.867929000 |
| 6 | -3.775440000 | 2.333468000  | -1.141414000 |
| 6 | -3.333883000 | 1.158172000  | -3.303035000 |
| 1 | -1.836544000 | 1.837260000  | -1.922684000 |
| 1 | -3.443101000 | 2.586192000  | -0.132102000 |
| 1 | -3.842748000 | 3.267365000  | -1.705607000 |
| 1 | -4.783077000 | 1.909686000  | -1.071380000 |
| 1 | -2.640908000 | 0.569159000  | -3.907946000 |
| 1 | -4.303230000 | 0.648895000  | -3.297826000 |
| 1 | -3.461904000 | 2.126922000  | -3.793940000 |
| 6 | -2.061680000 | -3.835358000 | 0.823774000  |
| 1 | -2.917899000 | -4.495555000 | 0.653333000  |
| 1 | -1.166990000 | -4.332007000 | 0.441576000  |
| 1 | -1.952369000 | -3.690191000 | 1.900953000  |
| 8 | -0.277036000 | -0.829657000 | 2.208775000  |
| 6 | -0.874294000 | -0.193578000 | 3.155506000  |
| 1 | -1.732620000 | 0.434600000  | 2.846393000  |
| 8 | -0.546748000 | -0.250648000 | 4.343732000  |

4a

Coordinates (Angstroms)

|    | X            | Y            | Z            |
|----|--------------|--------------|--------------|
| 44 | -1.294247000 | -0.154450000 | -0.295158000 |
| 7  | 0.312914000  | -1.479613000 | -0.102131000 |
| 7  | 0.366227000  | 1.115463000  | -0.234791000 |

|   |              |              |              |
|---|--------------|--------------|--------------|
| 8 | 3.534779000  | -3.968683000 | 0.456430000  |
| 8 | 3.825065000  | 3.329562000  | -0.070961000 |
| 6 | 0.178135000  | -2.817308000 | -0.043024000 |
| 1 | -0.825572000 | -3.208122000 | -0.150621000 |
| 6 | 1.247770000  | -3.660836000 | 0.140716000  |
| 1 | 1.103758000  | -4.732933000 | 0.187655000  |
| 6 | 2.529092000  | -3.109390000 | 0.270362000  |
| 6 | 2.675206000  | -1.721785000 | 0.198013000  |
| 1 | 3.646417000  | -1.256321000 | 0.287904000  |
| 6 | 1.544134000  | -0.941438000 | 0.011213000  |
| 6 | 4.859759000  | -3.450552000 | 0.597890000  |
| 1 | 5.163089000  | -2.910213000 | -0.303406000 |
| 1 | 5.500205000  | -4.319703000 | 0.737743000  |
| 1 | 4.929067000  | -2.797507000 | 1.472571000  |
| 6 | 1.579717000  | 0.532568000  | -0.079298000 |
| 6 | 2.738765000  | 1.276717000  | -0.024208000 |
| 1 | 3.709060000  | 0.814186000  | 0.102956000  |
| 6 | 2.664902000  | 2.670885000  | -0.140965000 |
| 6 | 1.413586000  | 3.264638000  | -0.324118000 |
| 1 | 1.283692000  | 4.332125000  | -0.438295000 |
| 6 | 0.300407000  | 2.445608000  | -0.366759000 |
| 1 | -0.683054000 | 2.870847000  | -0.521452000 |
| 6 | 3.803982000  | 4.755631000  | -0.171404000 |
| 1 | 3.413780000  | 5.070719000  | -1.143201000 |
| 1 | 4.840984000  | 5.071894000  | -0.071930000 |
| 1 | 3.205844000  | 5.190707000  | 0.634310000  |
| 6 | -2.734263000 | 1.303463000  | 0.627326000  |
| 1 | -2.585451000 | 2.374980000  | 0.708402000  |
| 6 | -3.350443000 | 0.779220000  | -0.511561000 |
| 1 | -3.666336000 | 1.444232000  | -1.306843000 |
| 6 | -3.489058000 | -0.639832000 | -0.684505000 |
| 6 | -3.004959000 | -1.486981000 | 0.325866000  |
| 1 | -3.061014000 | -2.561523000 | 0.197654000  |
| 6 | -2.326994000 | -0.946549000 | 1.459190000  |
| 1 | -1.868886000 | -1.633912000 | 2.160978000  |
| 6 | -2.173435000 | 0.450433000  | 1.634681000  |
| 6 | -1.451636000 | 1.067272000  | 2.810818000  |
| 6 | -0.331069000 | 0.190311000  | 3.365976000  |
| 6 | -2.481240000 | 1.419697000  | 3.892320000  |
| 1 | -1.006563000 | 1.998902000  | 2.442232000  |
| 1 | 0.376341000  | -0.098330000 | 2.582419000  |
| 1 | 0.218181000  | 0.741724000  | 4.134074000  |
| 1 | -0.721871000 | -0.719938000 | 3.832033000  |
| 1 | -3.254862000 | 2.088554000  | 3.502943000  |

|   |              |              |              |
|---|--------------|--------------|--------------|
| 1 | -2.967317000 | 0.514023000  | 4.270339000  |
| 1 | -1.989177000 | 1.920350000  | 4.731260000  |
| 6 | -4.067512000 | -1.172949000 | -1.957894000 |
| 1 | -5.147218000 | -0.994134000 | -1.971426000 |
| 1 | -3.628166000 | -0.654053000 | -2.813719000 |
| 1 | -3.885856000 | -2.244307000 | -2.056071000 |
| 8 | -1.398788000 | 0.772380000  | -3.642608000 |
| 6 | -0.506938000 | 0.174891000  | -3.032021000 |
| 1 | -0.911665000 | -0.412354000 | -2.076455000 |
| 8 | 0.701200000  | 0.010824000  | -3.215152000 |

**4b**

Coordinates (Angstroms)

|    | X            | Y            | Z            |
|----|--------------|--------------|--------------|
| 44 | -0.049221000 | -1.338121000 | 1.289378000  |
| 7  | -1.152904000 | 0.354822000  | 1.064307000  |
| 7  | 1.314693000  | -0.100572000 | 0.450384000  |
| 8  | -3.392121000 | 3.634697000  | 0.000847000  |
| 8  | 3.864208000  | 2.762936000  | -1.038179000 |
| 6  | -2.451676000 | 0.461723000  | 1.388973000  |
| 1  | -2.881162000 | -0.379346000 | 1.920805000  |
| 6  | -3.208401000 | 1.561894000  | 1.055127000  |
| 1  | -4.256287000 | 1.614674000  | 1.322751000  |
| 6  | -2.606848000 | 2.600993000  | 0.333634000  |
| 6  | -1.252191000 | 2.501584000  | 0.007053000  |
| 1  | -0.748266000 | 3.281644000  | -0.546963000 |
| 6  | -0.557166000 | 1.365877000  | 0.395396000  |
| 6  | -2.831892000 | 4.682212000  | -0.791437000 |
| 1  | -2.019548000 | 5.185285000  | -0.258492000 |
| 1  | -3.643813000 | 5.386210000  | -0.967033000 |
| 1  | -2.468777000 | 4.293306000  | -1.747558000 |
| 6  | 0.875843000  | 1.141432000  | 0.121337000  |
| 6  | 1.732259000  | 2.098479000  | -0.384199000 |
| 1  | 1.387154000  | 3.095339000  | -0.628886000 |
| 6  | 3.085592000  | 1.783213000  | -0.559749000 |
| 6  | 3.528444000  | 0.500671000  | -0.225328000 |
| 1  | 4.558646000  | 0.191509000  | -0.339304000 |
| 6  | 2.605835000  | -0.401782000 | 0.273550000  |
| 1  | 2.902504000  | -1.408044000 | 0.548599000  |
| 6  | 5.260653000  | 2.502109000  | -1.184374000 |
| 1  | 5.709116000  | 2.239590000  | -0.221910000 |
| 1  | 5.696883000  | 3.429933000  | -1.550944000 |
| 1  | 5.434454000  | 1.702450000  | -1.910459000 |
| 6  | -0.879347000 | -2.684811000 | -1.139305000 |

|   |              |              |              |
|---|--------------|--------------|--------------|
| 1 | -0.299400000 | -3.555086000 | -0.839225000 |
| 6 | -2.202074000 | -2.560748000 | -0.711269000 |
| 1 | -2.621980000 | -3.316795000 | -0.052475000 |
| 6 | -2.996078000 | -1.484114000 | -1.123530000 |
| 6 | -2.412478000 | -0.530475000 | -1.956217000 |
| 1 | -2.997502000 | 0.329902000  | -2.271630000 |
| 6 | -1.090188000 | -0.648549000 | -2.385803000 |
| 1 | -0.681260000 | 0.120365000  | -3.033309000 |
| 6 | -0.300544000 | -1.731136000 | -1.996739000 |
| 6 | 1.123397000  | -1.942084000 | -2.484589000 |
| 6 | 1.747101000  | -0.707654000 | -3.133914000 |
| 6 | 1.181675000  | -3.135400000 | -3.449461000 |
| 1 | 1.724020000  | -2.202755000 | -1.603177000 |
| 1 | 1.658213000  | 0.180398000  | -2.502212000 |
| 1 | 2.810467000  | -0.882344000 | -3.322928000 |
| 1 | 1.272155000  | -0.484362000 | -4.095824000 |
| 1 | 0.798085000  | -4.048504000 | -2.984690000 |
| 1 | 0.584716000  | -2.934096000 | -4.345918000 |
| 1 | 2.213599000  | -3.323431000 | -3.763254000 |
| 6 | -4.430106000 | -1.367839000 | -0.679792000 |
| 1 | -5.068771000 | -2.061523000 | -1.238014000 |
| 1 | -4.539619000 | -1.607002000 | 0.382293000  |
| 1 | -4.814567000 | -0.357502000 | -0.842535000 |
| 8 | 0.552763000  | -0.753710000 | 3.173371000  |
| 6 | 1.687624000  | -1.192272000 | 3.602746000  |
| 1 | 2.250025000  | -1.831514000 | 2.892703000  |
| 8 | 2.152337000  | -0.949006000 | 4.717892000  |

-----  
**TS4a-5**  
 -----

Coordinates (Angstroms)

|    | X            | Y            | Z            |
|----|--------------|--------------|--------------|
| 44 | 1.187436000  | -0.486643000 | 0.294863000  |
| 7  | -0.595321000 | -1.505421000 | -0.127672000 |
| 7  | -0.256999000 | 1.038175000  | 0.324723000  |
| 8  | -4.135940000 | -3.363650000 | -1.095161000 |
| 8  | -3.306995000 | 3.795187000  | 0.169173000  |
| 6  | -0.681381000 | -2.838130000 | -0.290086000 |
| 1  | 0.235402000  | -3.398556000 | -0.153827000 |
| 6  | -1.859128000 | -3.471820000 | -0.609352000 |
| 1  | -1.891688000 | -4.546348000 | -0.740121000 |
| 6  | -3.019167000 | -2.702863000 | -0.768213000 |
| 6  | -2.941721000 | -1.322480000 | -0.573223000 |
| 1  | -3.815768000 | -0.693826000 | -0.670622000 |
| 6  | -1.713930000 | -0.762025000 | -0.247401000 |

|   |              |              |              |
|---|--------------|--------------|--------------|
| 6 | -5.337063000 | -2.616785000 | -1.296252000 |
| 1 | -5.636594000 | -2.106641000 | -0.376157000 |
| 1 | -6.094240000 | -3.348599000 | -1.572170000 |
| 1 | -5.213330000 | -1.891107000 | -2.105448000 |
| 6 | -1.525275000 | 0.681168000  | 0.008348000  |
| 6 | -2.547648000 | 1.607481000  | -0.041950000 |
| 1 | -3.563272000 | 1.325252000  | -0.287844000 |
| 6 | -2.271793000 | 2.950405000  | 0.240735000  |
| 6 | -0.965380000 | 3.311264000  | 0.579044000  |
| 1 | -0.684841000 | 4.328192000  | 0.817603000  |
| 6 | -0.001429000 | 2.320302000  | 0.611535000  |
| 1 | 1.020871000  | 2.556457000  | 0.881060000  |
| 6 | -3.071474000 | 5.175638000  | 0.452836000  |
| 1 | -2.708590000 | 5.306631000  | 1.476352000  |
| 1 | -4.036039000 | 5.667677000  | 0.339123000  |
| 1 | -2.355523000 | 5.599527000  | -0.257360000 |
| 6 | 3.120612000  | 0.665437000  | 0.208985000  |
| 1 | 3.305111000  | 1.630022000  | 0.668677000  |
| 6 | 3.313204000  | -0.506817000 | 0.958781000  |
| 1 | 3.632437000  | -0.430169000 | 1.992424000  |
| 6 | 3.016173000  | -1.795443000 | 0.409887000  |
| 6 | 2.509245000  | -1.827749000 | -0.906313000 |
| 1 | 2.204744000  | -2.780138000 | -1.327729000 |
| 6 | 2.335934000  | -0.647174000 | -1.688266000 |
| 1 | 1.922255000  | -0.733946000 | -2.685142000 |
| 6 | 2.618542000  | 0.612840000  | -1.133261000 |
| 6 | 2.414820000  | 1.904114000  | -1.894092000 |
| 6 | 1.202137000  | 1.889105000  | -2.824463000 |
| 6 | 3.704208000  | 2.227989000  | -2.662013000 |
| 1 | 2.263590000  | 2.690252000  | -1.145923000 |
| 1 | 0.284681000  | 1.628511000  | -2.288141000 |
| 1 | 1.068065000  | 2.880806000  | -3.265780000 |
| 1 | 1.332561000  | 1.178522000  | -3.646880000 |
| 1 | 4.565551000  | 2.280533000  | -1.989158000 |
| 1 | 3.905080000  | 1.461794000  | -3.418454000 |
| 1 | 3.606103000  | 3.192735000  | -3.168240000 |
| 6 | 3.207308000  | -3.049106000 | 1.210412000  |
| 1 | 4.226651000  | -3.426228000 | 1.079253000  |
| 1 | 3.048157000  | -2.859229000 | 2.273982000  |
| 1 | 2.512096000  | -3.825718000 | 0.883030000  |
| 8 | 0.995633000  | 0.490803000  | 3.589190000  |
| 6 | 0.106566000  | -0.109816000 | 3.063133000  |
| 1 | 0.746652000  | -0.815171000 | 1.859086000  |
| 8 | -1.032852000 | -0.467522000 | 3.039572000  |

-----  
**TS4b-5**  
 -----

Coordinates (Angstroms)

|    | X            | Y            | Z            |
|----|--------------|--------------|--------------|
| 44 | -0.186824000 | -1.532787000 | -1.210212000 |
| 7  | 1.245946000  | 0.079422000  | -1.185292000 |
| 7  | -1.346050000 | 0.079158000  | -0.714582000 |
| 8  | 3.853555000  | 3.177887000  | -0.507404000 |
| 8  | -3.371282000 | 3.471409000  | 0.435335000  |
| 6  | 2.562670000  | -0.041278000 | -1.408381000 |
| 1  | 2.900276000  | -1.007580000 | -1.766203000 |
| 6  | 3.449741000  | 0.990479000  | -1.199033000 |
| 1  | 4.508989000  | 0.861575000  | -1.383094000 |
| 6  | 2.954546000  | 2.209074000  | -0.719253000 |
| 6  | 1.581462000  | 2.342426000  | -0.489643000 |
| 1  | 1.167134000  | 3.268311000  | -0.117278000 |
| 6  | 0.761943000  | 1.249940000  | -0.736622000 |
| 6  | 3.396234000  | 4.433060000  | -0.001130000 |
| 1  | 2.694953000  | 4.901188000  | -0.697945000 |
| 1  | 4.286597000  | 5.052461000  | 0.093854000  |
| 1  | 2.928328000  | 4.308258000  | 0.979815000  |
| 6  | -0.703333000 | 1.265683000  | -0.519912000 |
| 6  | -1.394133000 | 2.397566000  | -0.141516000 |
| 1  | -0.891486000 | 3.344376000  | 0.006871000  |
| 6  | -2.778266000 | 2.334007000  | 0.064714000  |
| 6  | -3.426549000 | 1.111416000  | -0.118823000 |
| 1  | -4.489727000 | 0.983297000  | 0.032352000  |
| 6  | -2.669249000 | 0.020368000  | -0.501329000 |
| 1  | -3.139767000 | -0.943519000 | -0.647824000 |
| 6  | -4.776875000 | 3.448327000  | 0.695928000  |
| 1  | -5.332672000 | 3.174695000  | -0.205363000 |
| 1  | -5.034954000 | 4.463421000  | 0.993097000  |
| 1  | -5.007409000 | 2.753206000  | 1.508100000  |
| 6  | 0.657317000  | -2.492854000 | 1.638015000  |
| 1  | 0.025143000  | -3.367232000 | 1.504392000  |
| 6  | 2.004422000  | -2.567354000 | 1.291941000  |
| 1  | 2.398759000  | -3.491947000 | 0.877657000  |
| 6  | 2.859434000  | -1.476881000 | 1.483264000  |
| 6  | 2.310337000  | -0.307738000 | 2.009059000  |
| 1  | 2.946794000  | 0.561762000  | 2.152533000  |
| 6  | 0.957915000  | -0.223239000 | 2.338581000  |
| 1  | 0.577730000  | 0.711628000  | 2.736866000  |
| 6  | 0.101517000  | -1.312886000 | 2.164063000  |
| 6  | -1.369749000 | -1.289436000 | 2.555813000  |

|   |              |              |              |
|---|--------------|--------------|--------------|
| 6 | -1.875901000 | 0.092692000  | 2.965226000  |
| 6 | -1.646900000 | -2.299416000 | 3.678971000  |
| 1 | -1.939087000 | -1.612262000 | 1.673782000  |
| 1 | -1.656538000 | 0.852912000  | 2.211482000  |
| 1 | -2.959606000 | 0.066320000  | 3.112781000  |
| 1 | -1.419058000 | 0.414824000  | 3.907829000  |
| 1 | -1.364691000 | -3.317109000 | 3.394182000  |
| 1 | -1.087556000 | -2.032002000 | 4.582553000  |
| 1 | -2.712826000 | -2.305283000 | 3.929438000  |
| 6 | 4.318335000  | -1.569223000 | 1.121630000  |
| 1 | 4.838326000  | -2.285253000 | 1.767195000  |
| 1 | 4.449029000  | -1.910968000 | 0.089771000  |
| 1 | 4.814838000  | -0.600977000 | 1.224739000  |
| 8 | -0.796120000 | -1.670026000 | -3.214358000 |
| 6 | -1.674296000 | -2.164591000 | -2.445870000 |
| 1 | -1.179356000 | -2.791771000 | -0.996532000 |
| 8 | -2.811766000 | -2.556849000 | -2.559916000 |

5

Coordinates (Angstroms)

|    | X            | Y            | Z            |
|----|--------------|--------------|--------------|
| 44 | 0.980597000  | -0.708956000 | -0.585022000 |
| 7  | 0.022830000  | 1.170290000  | -0.641129000 |
| 7  | -1.023751000 | -1.161676000 | -0.128706000 |
| 8  | -1.906745000 | 4.804820000  | -0.408735000 |
| 8  | -5.008016000 | -1.710897000 | 0.762450000  |
| 6  | 0.639873000  | 2.330525000  | -0.927774000 |
| 1  | 1.674029000  | 2.253560000  | -1.237154000 |
| 6  | 0.012091000  | 3.552336000  | -0.851670000 |
| 1  | 0.545763000  | 4.465010000  | -1.086688000 |
| 6  | -1.335082000 | 3.594349000  | -0.472499000 |
| 6  | -1.990483000 | 2.393915000  | -0.195555000 |
| 1  | -3.033602000 | 2.380389000  | 0.088050000  |
| 6  | -1.279209000 | 1.204082000  | -0.289814000 |
| 6  | -3.283753000 | 4.885145000  | -0.038937000 |
| 1  | -3.912364000 | 4.356874000  | -0.761891000 |
| 1  | -3.528442000 | 5.946117000  | -0.045871000 |
| 1  | -3.442659000 | 4.477807000  | 0.963968000  |
| 6  | -1.882909000 | -0.118890000 | -0.028502000 |
| 6  | -3.218851000 | -0.305464000 | 0.272964000  |
| 1  | -3.908569000 | 0.525776000  | 0.348972000  |
| 6  | -3.703307000 | -1.601988000 | 0.475673000  |
| 6  | -2.816550000 | -2.674965000 | 0.360986000  |
| 1  | -3.123073000 | -3.703487000 | 0.497405000  |



|   |              |              |              |
|---|--------------|--------------|--------------|
| 6 | -1.495318000 | -2.400717000 | 0.056590000  |
| 1 | -0.779651000 | -3.207158000 | -0.052630000 |
| 6 | -5.550894000 | -3.020940000 | 0.934426000  |
| 1 | -5.425924000 | -3.613347000 | 0.023366000  |
| 1 | -6.611168000 | -2.875569000 | 1.135102000  |
| 1 | -5.081241000 | -3.529879000 | 1.781206000  |
| 6 | 2.181582000  | -1.120754000 | 1.406206000  |
| 1 | 1.845930000  | -1.032005000 | 2.431853000  |
| 6 | 1.874663000  | -2.308764000 | 0.682089000  |
| 1 | 1.304617000  | -3.088738000 | 1.177538000  |
| 6 | 2.302897000  | -2.524781000 | -0.649111000 |
| 6 | 2.953315000  | -1.430836000 | -1.293007000 |
| 1 | 3.248755000  | -1.522407000 | -2.332214000 |
| 6 | 3.179015000  | -0.213694000 | -0.616449000 |
| 1 | 3.645771000  | 0.597929000  | -1.158385000 |
| 6 | 2.819835000  | -0.047993000 | 0.762306000  |
| 1 | 0.458671000  | -0.849341000 | -2.088898000 |
| 6 | 3.068186000  | 1.260822000  | 1.505608000  |
| 6 | 3.941119000  | 2.253143000  | 0.734709000  |
| 6 | 3.694732000  | 0.996383000  | 2.882448000  |
| 1 | 2.085789000  | 1.724755000  | 1.662100000  |
| 1 | 3.499045000  | 2.560763000  | -0.215553000 |
| 1 | 4.076560000  | 3.156134000  | 1.336250000  |
| 1 | 4.932196000  | 1.832159000  | 0.533398000  |
| 1 | 3.060987000  | 0.376614000  | 3.520923000  |
| 1 | 4.664213000  | 0.498388000  | 2.774486000  |
| 1 | 3.857066000  | 1.946033000  | 3.400440000  |
| 6 | 2.069396000  | -3.831507000 | -1.348142000 |
| 1 | 2.916118000  | -4.505569000 | -1.181261000 |
| 1 | 1.169890000  | -4.320214000 | -0.965076000 |
| 1 | 1.957466000  | -3.684636000 | -2.424591000 |

6

-----  
Coordinates (Angstroms)

|    | X            | Y            | Z            |
|----|--------------|--------------|--------------|
| 44 | 1.170782000  | 0.415564000  | 0.615179000  |
| 7  | -0.156213000 | 0.998999000  | -0.897182000 |
| 7  | -0.718858000 | 0.154779000  | 1.499032000  |
| 8  | -2.858206000 | 2.329729000  | -3.709402000 |
| 8  | -4.572375000 | -0.216259000 | 2.908399000  |
| 6  | 0.214546000  | 1.335958000  | -2.144900000 |
| 1  | 1.268674000  | 1.240431000  | -2.374278000 |
| 6  | -0.676114000 | 1.776634000  | -3.096617000 |
| 1  | -0.339161000 | 2.030047000  | -4.094215000 |

|   |              |              |              |
|---|--------------|--------------|--------------|
| 6 | -2.027525000 | 1.894465000  | -2.751223000 |
| 6 | -2.421592000 | 1.543332000  | -1.460431000 |
| 1 | -3.457155000 | 1.604823000  | -1.157238000 |
| 6 | -1.461194000 | 1.078751000  | -0.570206000 |
| 6 | -4.249435000 | 2.429105000  | -3.406340000 |
| 1 | -4.656976000 | 1.455136000  | -3.119186000 |
| 1 | -4.727140000 | 2.769119000  | -4.323844000 |
| 1 | -4.425200000 | 3.158403000  | -2.609879000 |
| 6 | -1.787735000 | 0.573976000  | 0.778255000  |
| 6 | -3.077914000 | 0.463442000  | 1.260213000  |
| 1 | -3.934075000 | 0.786377000  | 0.682183000  |
| 6 | -3.295187000 | -0.122474000 | 2.511190000  |
| 6 | -2.194270000 | -0.579733000 | 3.238532000  |
| 1 | -2.290955000 | -1.056837000 | 4.204366000  |
| 6 | -0.934649000 | -0.417281000 | 2.689254000  |
| 1 | -0.054903000 | -0.758835000 | 3.221274000  |
| 6 | -4.840386000 | -0.844850000 | 4.162109000  |
| 1 | -4.498609000 | -1.884113000 | 4.156269000  |
| 1 | -5.922324000 | -0.816432000 | 4.281948000  |
| 1 | -4.366542000 | -0.298566000 | 4.982902000  |
| 6 | 2.221753000  | 1.776020000  | 2.234334000  |
| 1 | 1.777006000  | 2.319357000  | 3.061777000  |
| 6 | 2.529418000  | 0.386095000  | 2.405143000  |
| 1 | 2.316138000  | -0.091184000 | 3.355299000  |
| 6 | 3.126734000  | -0.368945000 | 1.374243000  |
| 6 | 3.322797000  | 0.272234000  | 0.107559000  |
| 1 | 3.733139000  | -0.284617000 | -0.726466000 |
| 6 | 2.919621000  | 1.610669000  | -0.069101000 |
| 1 | 3.021969000  | 2.055328000  | -1.053797000 |
| 6 | 2.428574000  | 2.417864000  | 1.014068000  |
| 1 | 0.885169000  | -1.035186000 | 0.063048000  |
| 6 | 2.121556000  | 3.887118000  | 0.813881000  |
| 6 | 1.075950000  | 4.124917000  | -0.280255000 |
| 6 | 3.415670000  | 4.653431000  | 0.513184000  |
| 1 | 1.712844000  | 4.261052000  | 1.759305000  |
| 1 | 0.134305000  | 3.619108000  | -0.046644000 |
| 1 | 0.876069000  | 5.196431000  | -0.378249000 |
| 1 | 1.425912000  | 3.763026000  | -1.252950000 |
| 1 | 4.155095000  | 4.515164000  | 1.307977000  |
| 1 | 3.859851000  | 4.313228000  | -0.428869000 |
| 1 | 3.210436000  | 5.724187000  | 0.419963000  |
| 6 | 3.517078000  | -1.803906000 | 1.576746000  |
| 1 | 4.594531000  | -1.875755000 | 1.759283000  |
| 1 | 2.994790000  | -2.231967000 | 2.435179000  |

|   |              |              |              |
|---|--------------|--------------|--------------|
| 1 | 3.281782000  | -2.398944000 | 0.692588000  |
| 6 | -3.032625000 | -1.689364000 | -1.980571000 |
| 6 | -1.676512000 | -1.924496000 | -2.186167000 |
| 6 | -0.935464000 | -2.623334000 | -1.227058000 |
| 6 | -1.560931000 | -3.064074000 | -0.051476000 |
| 6 | -2.908055000 | -2.810554000 | 0.157959000  |
| 6 | -3.646610000 | -2.127266000 | -0.810367000 |
| 1 | -3.604788000 | -1.152568000 | -2.730102000 |
| 1 | -1.206032000 | -1.566533000 | -3.095770000 |
| 1 | -0.978906000 | -3.594353000 | 0.694411000  |
| 1 | -3.385466000 | -3.137728000 | 1.075673000  |
| 1 | -4.700865000 | -1.929411000 | -0.645016000 |
| 6 | 0.502748000  | -2.916542000 | -1.428666000 |
| 8 | 1.051300000  | -3.753233000 | -0.695724000 |
| 6 | 1.263368000  | -2.242589000 | -2.527986000 |
| 1 | 1.034062000  | -2.750521000 | -3.472056000 |
| 1 | 0.976330000  | -1.195728000 | -2.634040000 |
| 1 | 2.335404000  | -2.311565000 | -2.342419000 |
| 8 | 3.453924000  | -4.423655000 | -0.963215000 |
| 1 | 4.024716000  | -3.604571000 | -1.248988000 |
| 1 | 2.463025000  | -4.124992000 | -0.869017000 |
| 1 | 3.761030000  | -4.703013000 | -0.087887000 |
| 8 | 4.796839000  | -2.411016000 | -1.630312000 |
| 1 | 5.502535000  | -2.628149000 | -2.252436000 |
| 1 | 5.241857000  | -2.077073000 | -0.840736000 |

-----  
**TS6-7**  
 -----

Coordinates (Angstroms)

|    | X            | Y            | Z            |
|----|--------------|--------------|--------------|
| 44 | 1.165988000  | 0.222110000  | 0.576591000  |
| 7  | -0.108569000 | 1.160539000  | -0.785214000 |
| 7  | -0.737318000 | -0.206381000 | 1.334439000  |
| 8  | -2.727413000 | 3.085012000  | -3.312551000 |
| 8  | -4.608606000 | -0.705589000 | 2.640646000  |
| 6  | 0.302678000  | 1.773215000  | -1.909600000 |
| 1  | 1.365264000  | 1.734791000  | -2.114767000 |
| 6  | -0.560249000 | 2.416495000  | -2.765909000 |
| 1  | -0.192613000 | 2.895692000  | -3.664671000 |
| 6  | -1.925392000 | 2.444007000  | -2.452768000 |
| 6  | -2.360446000 | 1.803504000  | -1.292557000 |
| 1  | -3.407756000 | 1.779436000  | -1.026388000 |
| 6  | -1.423879000 | 1.161246000  | -0.492865000 |
| 6  | -4.127805000 | 3.120434000  | -3.033691000 |
| 1  | -4.544670000 | 2.109087000  | -3.006466000 |

|   |              |              |              |
|---|--------------|--------------|--------------|
| 1 | -4.577619000 | 3.679438000  | -3.852511000 |
| 1 | -4.321964000 | 3.631705000  | -2.086248000 |
| 6 | -1.784898000 | 0.384457000  | 0.709585000  |
| 6 | -3.080271000 | 0.226177000  | 1.157902000  |
| 1 | -3.917465000 | 0.696954000  | 0.659296000  |
| 6 | -3.327326000 | -0.583927000 | 2.271659000  |
| 6 | -2.248335000 | -1.207554000 | 2.900902000  |
| 1 | -2.367708000 | -1.857320000 | 3.757488000  |
| 6 | -0.980170000 | -0.988325000 | 2.392780000  |
| 1 | -0.118277000 | -1.457969000 | 2.850639000  |
| 6 | -4.912202000 | -1.539056000 | 3.759935000  |
| 1 | -4.626746000 | -2.576094000 | 3.560105000  |
| 1 | -5.991195000 | -1.474946000 | 3.891024000  |
| 1 | -4.411241000 | -1.177808000 | 4.662619000  |
| 6 | 2.030717000  | 1.143049000  | 2.510508000  |
| 1 | 1.482178000  | 1.453491000  | 3.393723000  |
| 6 | 2.423504000  | -0.225714000 | 2.385796000  |
| 1 | 2.172670000  | -0.925558000 | 3.174889000  |
| 6 | 3.122156000  | -0.683556000 | 1.253321000  |
| 6 | 3.367807000  | 0.251014000  | 0.194077000  |
| 1 | 3.857318000  | -0.082042000 | -0.713609000 |
| 6 | 2.926106000  | 1.580526000  | 0.307162000  |
| 1 | 3.074472000  | 2.252885000  | -0.531833000 |
| 6 | 2.292748000  | 2.073680000  | 1.497741000  |
| 1 | 0.912952000  | -1.070007000 | -0.399207000 |
| 6 | 1.934950000  | 3.536597000  | 1.653590000  |
| 6 | 0.987310000  | 4.049783000  | 0.566495000  |
| 6 | 3.224656000  | 4.367402000  | 1.695206000  |
| 1 | 1.429816000  | 3.638850000  | 2.619924000  |
| 1 | 0.035837000  | 3.511060000  | 0.581444000  |
| 1 | 0.781746000  | 5.111934000  | 0.730140000  |
| 1 | 1.427271000  | 3.945224000  | -0.430704000 |
| 1 | 3.900324000  | 4.018366000  | 2.481848000  |
| 1 | 3.754913000  | 4.308368000  | 0.738399000  |
| 1 | 2.990874000  | 5.418900000  | 1.886709000  |
| 6 | 3.579241000  | -2.105421000 | 1.146285000  |
| 1 | 4.619604000  | -2.180710000 | 1.479880000  |
| 1 | 2.969750000  | -2.759534000 | 1.773500000  |
| 1 | 3.529302000  | -2.456609000 | 0.116576000  |
| 6 | -3.057748000 | -1.460358000 | -2.094175000 |
| 6 | -1.672642000 | -1.462669000 | -2.225261000 |
| 6 | -0.889852000 | -2.231839000 | -1.357564000 |
| 6 | -1.507938000 | -2.981368000 | -0.345182000 |
| 6 | -2.887159000 | -2.963220000 | -0.210817000 |

|   |              |              |              |
|---|--------------|--------------|--------------|
| 6 | -3.665299000 | -2.204126000 | -1.087577000 |
| 1 | -3.658738000 | -0.861471000 | -2.770227000 |
| 1 | -1.214114000 | -0.864738000 | -3.005128000 |
| 1 | -0.901807000 | -3.567085000 | 0.336714000  |
| 1 | -3.359698000 | -3.531063000 | 0.583673000  |
| 1 | -4.744625000 | -2.187924000 | -0.976176000 |
| 6 | 0.576658000  | -2.299167000 | -1.520216000 |
| 8 | 1.144860000  | -3.325203000 | -0.974441000 |
| 6 | 1.274329000  | -1.623446000 | -2.659467000 |
| 1 | 1.123410000  | -2.246247000 | -3.549154000 |
| 1 | 0.874632000  | -0.630818000 | -2.852746000 |
| 1 | 2.342889000  | -1.547280000 | -2.459143000 |
| 8 | 3.430410000  | -3.956618000 | -1.839622000 |
| 1 | 4.018547000  | -3.173508000 | -1.968226000 |
| 1 | 2.103784000  | -3.508120000 | -1.313890000 |
| 1 | 3.850439000  | -4.467597000 | -1.137218000 |
| 8 | 4.948935000  | -1.741274000 | -2.064654000 |
| 1 | 5.638546000  | -1.800073000 | -2.735890000 |
| 1 | 5.424439000  | -1.715300000 | -1.225761000 |

7

-----  
Coordinates (Angstroms)

|    | X            | Y            | Z            |
|----|--------------|--------------|--------------|
| 44 | 1.247387000  | 0.219976000  | 0.563140000  |
| 7  | 0.001588000  | 1.155567000  | -0.828414000 |
| 7  | -0.665954000 | -0.071429000 | 1.355401000  |
| 8  | -2.511126000 | 3.127886000  | -3.407843000 |
| 8  | -4.555032000 | -0.578775000 | 2.570352000  |
| 6  | 0.448040000  | 1.710621000  | -1.969858000 |
| 1  | 1.507544000  | 1.613726000  | -2.171643000 |
| 6  | -0.383359000 | 2.365359000  | -2.846156000 |
| 1  | 0.006408000  | 2.799563000  | -3.758096000 |
| 6  | -1.745601000 | 2.471187000  | -2.533442000 |
| 6  | -2.214579000 | 1.886571000  | -1.353561000 |
| 1  | -3.260523000 | 1.927863000  | -1.084247000 |
| 6  | -1.312941000 | 1.223412000  | -0.536772000 |
| 6  | -3.907745000 | 3.258399000  | -3.131234000 |
| 1  | -4.384776000 | 2.276235000  | -3.067063000 |
| 1  | -4.321749000 | 3.813766000  | -3.970853000 |
| 1  | -4.066879000 | 3.815612000  | -2.203777000 |
| 6  | -1.701833000 | 0.494158000  | 0.686685000  |
| 6  | -3.003457000 | 0.339456000  | 1.107375000  |
| 1  | -3.833048000 | 0.779229000  | 0.569505000  |
| 6  | -3.269035000 | -0.443040000 | 2.239511000  |

|   |              |              |              |
|---|--------------|--------------|--------------|
| 6 | -2.199451000 | -1.028331000 | 2.921070000  |
| 1 | -2.334987000 | -1.648819000 | 3.796324000  |
| 6 | -0.921476000 | -0.814406000 | 2.438773000  |
| 1 | -0.066227000 | -1.258964000 | 2.932725000  |
| 6 | -4.881664000 | -1.403612000 | 3.691525000  |
| 1 | -4.550697000 | -2.432119000 | 3.521572000  |
| 1 | -5.966941000 | -1.374418000 | 3.771710000  |
| 1 | -4.433429000 | -1.007948000 | 4.607142000  |
| 6 | 2.052053000  | 0.988479000  | 2.437365000  |
| 1 | 1.438837000  | 1.230463000  | 3.299219000  |
| 6 | 2.578493000  | -0.323280000 | 2.308749000  |
| 1 | 2.363433000  | -1.066946000 | 3.066822000  |
| 6 | 3.260631000  | -0.694469000 | 1.136382000  |
| 6 | 3.469447000  | 0.288992000  | 0.113586000  |
| 1 | 3.942580000  | -0.009957000 | -0.815254000 |
| 6 | 2.998654000  | 1.597054000  | 0.275362000  |
| 1 | 3.117400000  | 2.305049000  | -0.537663000 |
| 6 | 2.252460000  | 1.977961000  | 1.436892000  |
| 1 | 0.704555000  | -1.422923000 | -0.402853000 |
| 6 | 1.779525000  | 3.396905000  | 1.661991000  |
| 6 | 1.084380000  | 4.035715000  | 0.459756000  |
| 6 | 2.999673000  | 4.219987000  | 2.102560000  |
| 1 | 1.066563000  | 3.367150000  | 2.492519000  |
| 1 | 0.144736000  | 3.529463000  | 0.225902000  |
| 1 | 0.855457000  | 5.080229000  | 0.689886000  |
| 1 | 1.715856000  | 4.027373000  | -0.434510000 |
| 1 | 3.475750000  | 3.785225000  | 2.986540000  |
| 1 | 3.743942000  | 4.266962000  | 1.300219000  |
| 1 | 2.694948000  | 5.242079000  | 2.344527000  |
| 6 | 3.704228000  | -2.103352000 | 0.911954000  |
| 1 | 4.794527000  | -2.154456000 | 1.000447000  |
| 1 | 3.261709000  | -2.779347000 | 1.645024000  |
| 1 | 3.435338000  | -2.436751000 | -0.090010000 |
| 6 | -3.236490000 | -1.496930000 | -2.016361000 |
| 6 | -1.844233000 | -1.510086000 | -2.091069000 |
| 6 | -1.089310000 | -2.233066000 | -1.164990000 |
| 6 | -1.757214000 | -2.940784000 | -0.158907000 |
| 6 | -3.145142000 | -2.926963000 | -0.082853000 |
| 6 | -3.891395000 | -2.202016000 | -1.011969000 |
| 1 | -3.805021000 | -0.923084000 | -2.741796000 |
| 1 | -1.356740000 | -0.937822000 | -2.873536000 |
| 1 | -1.184278000 | -3.499027000 | 0.573790000  |
| 1 | -3.646126000 | -3.471119000 | 0.712113000  |
| 1 | -4.974715000 | -2.183426000 | -0.946581000 |

|   |             |              |              |
|---|-------------|--------------|--------------|
| 6 | 0.429000000 | -2.212892000 | -1.172940000 |
| 8 | 0.923136000 | -3.433218000 | -0.693812000 |
| 6 | 1.076306000 | -1.799422000 | -2.482846000 |
| 1 | 0.840647000 | -2.529707000 | -3.262542000 |
| 1 | 0.736459000 | -0.815998000 | -2.810431000 |
| 1 | 2.159662000 | -1.748948000 | -2.356936000 |
| 8 | 3.289413000 | -4.174706000 | -1.846374000 |
| 1 | 3.790021000 | -3.365693000 | -2.084132000 |
| 1 | 1.791014000 | -3.626369000 | -1.115370000 |
| 1 | 3.775297000 | -4.535102000 | -1.095833000 |
| 8 | 4.648118000 | -1.814135000 | -2.327516000 |
| 1 | 5.139616000 | -1.819444000 | -3.156606000 |
| 1 | 5.325512000 | -1.825563000 | -1.641231000 |

8

Coordinates (Angstroms)

|    | X            | Y            | Z            |
|----|--------------|--------------|--------------|
| 44 | -1.285152000 | 0.127470000  | -0.574865000 |
| 7  | 0.265856000  | -1.308480000 | -0.498999000 |
| 7  | 0.465284000  | 1.283214000  | -0.295145000 |
| 8  | 3.352318000  | -4.018789000 | -0.289581000 |
| 8  | 4.026308000  | 3.245356000  | 0.322440000  |
| 6  | 0.063089000  | -2.629677000 | -0.627746000 |
| 1  | -0.959269000 | -2.945316000 | -0.797383000 |
| 6  | 1.084517000  | -3.549359000 | -0.560852000 |
| 1  | 0.886637000  | -4.608141000 | -0.672796000 |
| 6  | 2.390229000  | -3.089209000 | -0.349519000 |
| 6  | 2.607722000  | -1.716018000 | -0.219083000 |
| 1  | 3.601516000  | -1.321347000 | -0.058783000 |
| 6  | 1.518848000  | -0.857467000 | -0.303200000 |
| 6  | 4.702049000  | -3.590792000 | -0.101500000 |
| 1  | 5.023219000  | -2.942018000 | -0.921547000 |
| 1  | 5.300135000  | -4.500832000 | -0.098896000 |
| 1  | 4.816878000  | -3.073426000 | 0.855362000  |
| 6  | 1.635585000  | 0.613106000  | -0.186934000 |
| 6  | 2.831565000  | 1.274052000  | 0.013762000  |
| 1  | 3.771017000  | 0.744004000  | 0.102278000  |
| 6  | 2.835666000  | 2.670854000  | 0.111104000  |
| 6  | 1.626422000  | 3.358164000  | -0.018538000 |
| 1  | 1.557898000  | 4.436272000  | 0.037140000  |
| 6  | 0.475305000  | 2.618120000  | -0.221827000 |
| 1  | -0.481913000 | 3.113491000  | -0.333465000 |
| 6  | 4.075809000  | 4.666890000  | 0.455720000  |
| 1  | 3.726730000  | 5.156071000  | -0.457974000 |

|   |              |              |              |
|---|--------------|--------------|--------------|
| 1 | 5.123800000  | 4.908114000  | 0.625802000  |
| 1 | 3.478266000  | 4.996941000  | 1.310637000  |
| 6 | -2.398851000 | 1.282315000  | 0.938818000  |
| 1 | -1.992034000 | 2.136235000  | 1.471960000  |
| 6 | -3.037248000 | 1.502984000  | -0.314355000 |
| 1 | -3.126025000 | 2.509289000  | -0.706073000 |
| 6 | -3.487258000 | 0.402089000  | -1.081414000 |
| 6 | -3.275170000 | -0.909156000 | -0.578561000 |
| 1 | -3.551084000 | -1.769651000 | -1.176270000 |
| 6 | -2.638500000 | -1.098341000 | 0.676514000  |
| 1 | -2.429867000 | -2.113639000 | 0.996344000  |
| 6 | -2.231130000 | -0.010995000 | 1.492112000  |
| 6 | -1.609137000 | -0.202873000 | 2.858753000  |
| 6 | -0.539473000 | -1.296604000 | 2.896983000  |
| 6 | -2.720281000 | -0.474647000 | 3.880929000  |
| 1 | -1.128897000 | 0.746884000  | 3.119305000  |
| 1 | 0.283031000  | -1.071512000 | 2.212506000  |
| 1 | -0.128712000 | -1.375414000 | 3.907968000  |
| 1 | -0.948124000 | -2.277285000 | 2.631724000  |
| 1 | -3.469314000 | 0.322865000  | 3.874010000  |
| 1 | -3.226407000 | -1.420593000 | 3.657661000  |
| 1 | -2.301027000 | -0.544651000 | 4.889224000  |
| 6 | -4.098257000 | 0.610731000  | -2.432798000 |
| 1 | -5.182229000 | 0.718423000  | -2.324447000 |
| 1 | -3.712629000 | 1.518343000  | -2.901642000 |
| 1 | -3.907147000 | -0.243108000 | -3.086932000 |
| 8 | -0.742375000 | 0.260211000  | -2.559727000 |
| 1 | -1.554754000 | 0.128953000  | -3.057921000 |

9

-----  
Coordinates (Angstroms)

|    | X            | Y            | Z            |
|----|--------------|--------------|--------------|
| 44 | -0.997818000 | -0.810484000 | -0.494369000 |
| 7  | -0.843058000 | 1.258172000  | -0.124402000 |
| 7  | 0.927488000  | -0.331077000 | -1.199159000 |
| 8  | -0.326947000 | 5.270278000  | 0.675510000  |
| 8  | 4.684295000  | 0.913722000  | -2.342436000 |
| 6  | -1.788073000 | 1.998811000  | 0.481995000  |
| 1  | -2.703228000 | 1.486807000  | 0.751813000  |
| 6  | -1.630989000 | 3.337257000  | 0.758026000  |
| 1  | -2.417887000 | 3.894918000  | 1.250663000  |
| 6  | -0.436128000 | 3.965711000  | 0.389612000  |
| 6  | 0.552209000  | 3.207156000  | -0.237925000 |
| 1  | 1.491849000  | 3.652970000  | -0.531720000 |



|   |              |              |              |
|---|--------------|--------------|--------------|
| 6 | 0.314807000  | 1.857183000  | -0.471914000 |
| 6 | 0.883860000  | 5.941953000  | 0.327341000  |
| 1 | 1.738381000  | 5.499552000  | 0.847899000  |
| 1 | 0.751986000  | 6.972843000  | 0.652059000  |
| 1 | 1.048489000  | 5.915492000  | -0.753963000 |
| 6 | 1.318236000  | 0.960892000  | -1.082157000 |
| 6 | 2.573187000  | 1.380285000  | -1.482692000 |
| 1 | 2.895813000  | 2.407690000  | -1.372350000 |
| 6 | 3.469286000  | 0.450000000  | -2.015942000 |
| 6 | 3.059576000  | -0.877826000 | -2.146751000 |
| 1 | 3.704887000  | -1.651706000 | -2.539695000 |
| 6 | 1.791935000  | -1.215776000 | -1.711292000 |
| 1 | 1.452898000  | -2.242466000 | -1.766374000 |
| 6 | 5.657029000  | -0.024541000 | -2.803489000 |
| 1 | 5.846017000  | -0.790860000 | -2.045158000 |
| 1 | 6.564960000  | 0.551175000  | -2.975977000 |
| 1 | 5.335970000  | -0.493450000 | -3.738125000 |
| 6 | -1.979712000 | -1.876981000 | -2.389787000 |
| 1 | -1.695917000 | -1.839902000 | -3.436372000 |
| 6 | -1.293461000 | -2.780529000 | -1.513083000 |
| 1 | -0.502858000 | -3.405697000 | -1.913871000 |
| 6 | -1.647341000 | -2.912745000 | -0.154762000 |
| 6 | -2.649858000 | -2.022010000 | 0.349143000  |
| 1 | -2.925812000 | -2.063839000 | 1.396042000  |
| 6 | -3.222940000 | -1.048845000 | -0.489822000 |
| 1 | -3.928838000 | -0.346522000 | -0.058511000 |
| 6 | -2.950229000 | -1.005260000 | -1.902600000 |
| 1 | -0.245771000 | -0.887073000 | 0.888428000  |
| 6 | -3.692244000 | -0.049573000 | -2.812236000 |
| 6 | -3.549530000 | 1.413352000  | -2.383762000 |
| 6 | -5.169543000 | -0.455322000 | -2.890899000 |
| 1 | -3.252524000 | -0.155596000 | -3.810099000 |
| 1 | -2.500273000 | 1.721678000  | -2.365606000 |
| 1 | -4.085351000 | 2.059382000  | -3.085855000 |
| 1 | -3.973893000 | 1.582129000  | -1.388438000 |
| 1 | -5.282530000 | -1.489026000 | -3.231265000 |
| 1 | -5.651628000 | -0.362635000 | -1.911353000 |
| 1 | -5.703793000 | 0.194955000  | -3.590266000 |
| 6 | -0.984308000 | -3.915946000 | 0.743767000  |
| 1 | -1.566781000 | -4.842828000 | 0.770196000  |
| 1 | 0.020053000  | -4.152197000 | 0.384241000  |
| 1 | -0.910091000 | -3.528592000 | 1.762854000  |
| 6 | 4.348103000  | -0.698941000 | 0.987374000  |
| 6 | 3.290276000  | -0.144808000 | 1.701096000  |

|   |              |              |             |
|---|--------------|--------------|-------------|
| 6 | 2.280598000  | -0.969480000 | 2.211175000 |
| 6 | 2.328036000  | -2.348884000 | 1.969418000 |
| 6 | 3.375875000  | -2.896370000 | 1.241104000 |
| 6 | 4.392179000  | -2.071886000 | 0.757817000 |
| 1 | 5.129108000  | -0.055234000 | 0.595749000 |
| 1 | 3.262469000  | 0.927395000  | 1.862884000 |
| 1 | 1.536829000  | -2.983901000 | 2.353139000 |
| 1 | 3.404427000  | -3.964579000 | 1.052574000 |
| 1 | 5.213832000  | -2.499353000 | 0.191723000 |
| 6 | 1.150575000  | -0.417426000 | 3.004535000 |
| 8 | 0.391149000  | -1.188743000 | 3.598149000 |
| 6 | 0.962686000  | 1.068651000  | 3.082846000 |
| 1 | 1.802417000  | 1.511825000  | 3.628677000 |
| 1 | 0.956070000  | 1.514061000  | 2.084668000 |
| 1 | 0.035711000  | 1.305808000  | 3.603994000 |
| 1 | -1.780052000 | -0.024037000 | 2.300906000 |
| 6 | -2.526677000 | -0.006924000 | 3.108829000 |
| 8 | -2.071487000 | -0.425393000 | 4.278626000 |
| 1 | -1.120511000 | -0.688855000 | 4.161201000 |
| 8 | -3.676504000 | 0.354416000  | 2.945487000 |

### TS9-10

-----  
Coordinates (Angstroms)

|    | X            | Y            | Z            |
|----|--------------|--------------|--------------|
| 44 | 0.803490000  | -0.620610000 | 0.635351000  |
| 7  | 1.040075000  | 1.277505000  | -0.213757000 |
| 7  | -1.108634000 | 0.206429000  | 0.782104000  |
| 8  | 1.366735000  | 5.046300000  | -1.832468000 |
| 8  | -4.821403000 | 1.965786000  | 0.611331000  |
| 6  | 2.207706000  | 1.757819000  | -0.676702000 |
| 1  | 3.065242000  | 1.099862000  | -0.604126000 |
| 6  | 2.331179000  | 3.014604000  | -1.221368000 |
| 1  | 3.287230000  | 3.367770000  | -1.587197000 |
| 6  | 1.196675000  | 3.832748000  | -1.295289000 |
| 6  | -0.018024000 | 3.341497000  | -0.812603000 |
| 1  | -0.917255000 | 3.940779000  | -0.842329000 |
| 6  | -0.056092000 | 2.058955000  | -0.283411000 |
| 6  | 0.237737000  | 5.916627000  | -1.926251000 |
| 1  | -0.540954000 | 5.476261000  | -2.555680000 |
| 1  | 0.609582000  | 6.829670000  | -2.388157000 |
| 1  | -0.164594000 | 6.141327000  | -0.934265000 |
| 6  | -1.288621000 | 1.435207000  | 0.241766000  |
| 6  | -2.535759000 | 2.025096000  | 0.183226000  |
| 1  | -2.688816000 | 2.993294000  | -0.276483000 |

|   |              |              |              |
|---|--------------|--------------|--------------|
| 6 | -3.637903000 | 1.349667000  | 0.720194000  |
| 6 | -3.439186000 | 0.101330000  | 1.312871000  |
| 1 | -4.245379000 | -0.475649000 | 1.744588000  |
| 6 | -2.164257000 | -0.432091000 | 1.299911000  |
| 1 | -1.982860000 | -1.418544000 | 1.707378000  |
| 6 | -5.973915000 | 1.303482000  | 1.134717000  |
| 1 | -6.134439000 | 0.347069000  | 0.627790000  |
| 1 | -6.811344000 | 1.970461000  | 0.936433000  |
| 1 | -5.874357000 | 1.144977000  | 2.212291000  |
| 6 | 0.698164000  | -1.577350000 | 2.644305000  |
| 1 | -0.180993000 | -1.567702000 | 3.281585000  |
| 6 | 0.839839000  | -2.616417000 | 1.694253000  |
| 1 | 0.087487000  | -3.393064000 | 1.628715000  |
| 6 | 1.941546000  | -2.617741000 | 0.796515000  |
| 6 | 2.865046000  | -1.544724000 | 0.863535000  |
| 1 | 3.691908000  | -1.498163000 | 0.165012000  |
| 6 | 2.693593000  | -0.506765000 | 1.814077000  |
| 1 | 3.385386000  | 0.329313000  | 1.793268000  |
| 6 | 1.634216000  | -0.513969000 | 2.755425000  |
| 1 | 0.235942000  | -1.025050000 | -0.928901000 |
| 6 | 1.478770000  | 0.571764000  | 3.799444000  |
| 6 | 1.487862000  | 1.979147000  | 3.196240000  |
| 6 | 2.568622000  | 0.414202000  | 4.866923000  |
| 1 | 0.504836000  | 0.415356000  | 4.276255000  |
| 1 | 0.661640000  | 2.110816000  | 2.491743000  |
| 1 | 1.382407000  | 2.724286000  | 3.990518000  |
| 1 | 2.424174000  | 2.187580000  | 2.667641000  |
| 1 | 2.538905000  | -0.580650000 | 5.321255000  |
| 1 | 3.562034000  | 0.561883000  | 4.429018000  |
| 1 | 2.434165000  | 1.156461000  | 5.659554000  |
| 6 | 2.106548000  | -3.699473000 | -0.224785000 |
| 1 | 3.080940000  | -4.179082000 | -0.095562000 |
| 1 | 1.325883000  | -4.455789000 | -0.124789000 |
| 1 | 2.059759000  | -3.289938000 | -1.236394000 |
| 6 | -4.085726000 | -1.621497000 | -1.483677000 |
| 6 | -2.851236000 | -1.158816000 | -1.941126000 |
| 6 | -1.686566000 | -1.873262000 | -1.661588000 |
| 6 | -1.771158000 | -3.051412000 | -0.912665000 |
| 6 | -2.997786000 | -3.504111000 | -0.444411000 |
| 6 | -4.162455000 | -2.790186000 | -0.733779000 |
| 1 | -4.986183000 | -1.058898000 | -1.710481000 |
| 1 | -2.812149000 | -0.240898000 | -2.517796000 |
| 1 | -0.862364000 | -3.602372000 | -0.688372000 |
| 1 | -3.048636000 | -4.415017000 | 0.144060000  |

|   |              |              |              |
|---|--------------|--------------|--------------|
| 1 | -5.122098000 | -3.143906000 | -0.369942000 |
| 6 | -0.331048000 | -1.439522000 | -2.182904000 |
| 8 | 0.408899000  | -2.390534000 | -2.634831000 |
| 6 | -0.258317000 | -0.102625000 | -2.899872000 |
| 1 | -0.717102000 | -0.229635000 | -3.886749000 |
| 1 | -0.786461000 | 0.692538000  | -2.374328000 |
| 1 | 0.781464000  | 0.194537000  | -3.043649000 |
| 1 | 2.547517000  | -0.836982000 | -1.756249000 |
| 6 | 3.224884000  | -1.081110000 | -2.591001000 |
| 8 | 2.678901000  | -1.825521000 | -3.523417000 |
| 1 | 1.706973000  | -2.043916000 | -3.222970000 |
| 8 | 4.379721000  | -0.688046000 | -2.627910000 |

---

10

---

Coordinates (Angstroms)

|    | X            | Y            | Z            |
|----|--------------|--------------|--------------|
| 44 | -1.102234000 | -0.843255000 | -0.417987000 |
| 7  | -1.246757000 | 1.177848000  | 0.125089000  |
| 7  | 0.675559000  | -0.017934000 | -1.177676000 |
| 8  | -1.367072000 | 5.141965000  | 1.181153000  |
| 8  | 4.293617000  | 1.743347000  | -1.983535000 |
| 6  | -2.306307000 | 1.711696000  | 0.760999000  |
| 1  | -3.118184000 | 1.036211000  | 0.999392000  |
| 6  | -2.357815000 | 3.035761000  | 1.123996000  |
| 1  | -3.222720000 | 3.435960000  | 1.637739000  |
| 6  | -1.269438000 | 3.863157000  | 0.815351000  |
| 6  | -0.165787000 | 3.311210000  | 0.155824000  |
| 1  | 0.690990000  | 3.917218000  | -0.103763000 |
| 6  | -0.190629000 | 1.965004000  | -0.167839000 |
| 6  | -0.275963000 | 6.023359000  | 0.901105000  |
| 1  | 0.636770000  | 5.677936000  | 1.394331000  |
| 1  | -0.569946000 | 6.989482000  | 1.307377000  |
| 1  | -0.113893000 | 6.109295000  | -0.176936000 |
| 6  | 0.924885000  | 1.274738000  | -0.852352000 |
| 6  | 2.136745000  | 1.868061000  | -1.127942000 |
| 1  | 2.349327000  | 2.890757000  | -0.844723000 |
| 6  | 3.131682000  | 1.122190000  | -1.777694000 |
| 6  | 2.853164000  | -0.194270000 | -2.150559000 |
| 1  | 3.574787000  | -0.821921000 | -2.654686000 |
| 6  | 1.623553000  | -0.722235000 | -1.809835000 |
| 1  | 1.390504000  | -1.753126000 | -2.045209000 |
| 6  | 5.338519000  | 1.028345000  | -2.649077000 |
| 1  | 5.614608000  | 0.130747000  | -2.088489000 |
| 1  | 6.182856000  | 1.714556000  | -2.685422000 |

|   |              |              |              |
|---|--------------|--------------|--------------|
| 1 | 5.036008000  | 0.760881000  | -3.665468000 |
| 6 | -1.490549000 | -2.135392000 | -2.128402000 |
| 1 | -0.902239000 | -2.124760000 | -3.040201000 |
| 6 | -1.104650000 | -2.986667000 | -1.069573000 |
| 1 | -0.225714000 | -3.611773000 | -1.174616000 |
| 6 | -1.752679000 | -2.891645000 | 0.187032000  |
| 6 | -2.873993000 | -2.016628000 | 0.321272000  |
| 1 | -3.341282000 | -1.890450000 | 1.290797000  |
| 6 | -3.263534000 | -1.191265000 | -0.744993000 |
| 1 | -4.047225000 | -0.459628000 | -0.582019000 |
| 6 | -2.558830000 | -1.199147000 | -1.988964000 |
| 1 | 0.562429000  | -0.726536000 | 1.597504000  |
| 6 | -2.960114000 | -0.307549000 | -3.141576000 |
| 6 | -3.174685000 | 1.153153000  | -2.741574000 |
| 6 | -4.217669000 | -0.904742000 | -3.788641000 |
| 1 | -2.144288000 | -0.345603000 | -3.871359000 |
| 1 | -2.256391000 | 1.596749000  | -2.346796000 |
| 1 | -3.480243000 | 1.727412000  | -3.620933000 |
| 1 | -3.960661000 | 1.260225000  | -1.986843000 |
| 1 | -4.054107000 | -1.943991000 | -4.089129000 |
| 1 | -5.060702000 | -0.877457000 | -3.089726000 |
| 1 | -4.492541000 | -0.329641000 | -4.677448000 |
| 6 | -1.234778000 | -3.625922000 | 1.383745000  |
| 1 | -1.979985000 | -4.358630000 | 1.708301000  |
| 1 | -0.303219000 | -4.146313000 | 1.156728000  |
| 1 | -1.064584000 | -2.936635000 | 2.215543000  |
| 6 | 4.868893000  | -0.601354000 | 0.650256000  |
| 6 | 3.745934000  | -0.186278000 | 1.367457000  |
| 6 | 2.651538000  | -1.035263000 | 1.530142000  |
| 6 | 2.699245000  | -2.308559000 | 0.948457000  |
| 6 | 3.818364000  | -2.728105000 | 0.238024000  |
| 6 | 4.911299000  | -1.873150000 | 0.088434000  |
| 1 | 5.708473000  | 0.076818000  | 0.529801000  |
| 1 | 3.733928000  | 0.809751000  | 1.797260000  |
| 1 | 1.845574000  | -2.973772000 | 1.054161000  |
| 1 | 3.836973000  | -3.718848000 | -0.205679000 |
| 1 | 5.785728000  | -2.195993000 | -0.468280000 |
| 6 | 1.405472000  | -0.642243000 | 2.302651000  |
| 8 | 1.210384000  | -1.590509000 | 3.341249000  |
| 6 | 1.404399000  | 0.779417000  | 2.849191000  |
| 1 | 2.205914000  | 0.915358000  | 3.582187000  |
| 1 | 1.528255000  | 1.521065000  | 2.054235000  |
| 1 | 0.449500000  | 0.973482000  | 3.346189000  |
| 1 | -1.450059000 | -0.327610000 | 2.367690000  |

|   |              |              |             |
|---|--------------|--------------|-------------|
| 6 | -1.994617000 | -0.597717000 | 3.300003000 |
| 8 | -1.302045000 | -1.133577000 | 4.213394000 |
| 1 | 0.303682000  | -1.426914000 | 3.700654000 |
| 8 | -3.220077000 | -0.351005000 | 3.338722000 |

---

11

---

Coordinates (Angstroms)

|    | X            | Y            | Z            |
|----|--------------|--------------|--------------|
| 44 | -0.823883000 | -1.621671000 | 0.165325000  |
| 7  | 0.497668000  | -0.065299000 | 1.011387000  |
| 7  | -0.280549000 | 1.310369000  | -1.757811000 |
| 8  | 3.832395000  | 2.196530000  | 1.987601000  |
| 8  | -3.082477000 | 4.051012000  | -0.394563000 |
| 6  | 1.415301000  | -0.457487000 | 1.925521000  |
| 1  | 1.253246000  | -1.427916000 | 2.375224000  |
| 6  | 2.516983000  | 0.286211000  | 2.281340000  |
| 1  | 3.229447000  | -0.095458000 | 3.002353000  |
| 6  | 2.714816000  | 1.528569000  | 1.671866000  |
| 6  | 1.738340000  | 1.983845000  | 0.786585000  |
| 1  | 1.809810000  | 2.948574000  | 0.301799000  |
| 6  | 0.660691000  | 1.161663000  | 0.478666000  |
| 6  | 4.079581000  | 3.436080000  | 1.323089000  |
| 1  | 4.126357000  | 3.291804000  | 0.239486000  |
| 1  | 5.045559000  | 3.781165000  | 1.688765000  |
| 1  | 3.309544000  | 4.172077000  | 1.571590000  |
| 6  | -0.353301000 | 1.704794000  | -0.477480000 |
| 6  | -1.265476000 | 2.635737000  | -0.007680000 |
| 1  | -1.268414000 | 2.943817000  | 1.031813000  |
| 6  | -2.203417000 | 3.166116000  | -0.900464000 |
| 6  | -2.167869000 | 2.741479000  | -2.229905000 |
| 1  | -2.863950000 | 3.104473000  | -2.975056000 |
| 6  | -1.186806000 | 1.824969000  | -2.591971000 |
| 1  | -1.128670000 | 1.492133000  | -3.624876000 |
| 6  | -4.062706000 | 4.593834000  | -1.276700000 |
| 1  | -3.591041000 | 5.153045000  | -2.090365000 |
| 1  | -4.666396000 | 5.267848000  | -0.670353000 |
| 1  | -4.699844000 | 3.804644000  | -1.687698000 |
| 6  | -2.870840000 | -0.445467000 | -0.434351000 |
| 1  | -3.080787000 | 0.602145000  | -0.617093000 |
| 6  | -2.590837000 | -1.287631000 | -1.488213000 |
| 1  | -2.565099000 | -0.904695000 | -2.502910000 |
| 6  | -2.225698000 | -2.661316000 | -1.240477000 |
| 6  | -2.364668000 | -3.184823000 | 0.061841000  |
| 1  | -2.179343000 | -4.236982000 | 0.243598000  |

|   |              |              |              |
|---|--------------|--------------|--------------|
| 6 | -2.617723000 | -2.303946000 | 1.156296000  |
| 1 | -2.641240000 | -2.699814000 | 2.163840000  |
| 6 | -2.757942000 | -0.910721000 | 0.926739000  |
| 6 | -3.001871000 | 0.072926000  | 2.052971000  |
| 6 | -2.311907000 | -0.304755000 | 3.362687000  |
| 6 | -4.512531000 | 0.249181000  | 2.250376000  |
| 1 | -2.590872000 | 1.031287000  | 1.717109000  |
| 1 | -1.244779000 | -0.493704000 | 3.210582000  |
| 1 | -2.415742000 | 0.511554000  | 4.083535000  |
| 1 | -2.758307000 | -1.196813000 | 3.814718000  |
| 1 | -5.001477000 | 0.567033000  | 1.324059000  |
| 1 | -4.971111000 | -0.691979000 | 2.573622000  |
| 1 | -4.711321000 | 1.005909000  | 3.015500000  |
| 6 | -1.812799000 | -3.538949000 | -2.386331000 |
| 1 | -2.695849000 | -3.855840000 | -2.951245000 |
| 1 | -1.153555000 | -2.997014000 | -3.068695000 |
| 1 | -1.294564000 | -4.430950000 | -2.027983000 |
| 6 | 4.027024000  | 1.025081000  | -1.728522000 |
| 6 | 3.029515000  | 0.061574000  | -1.657944000 |
| 6 | 3.258455000  | -1.140506000 | -0.976331000 |
| 6 | 4.501761000  | -1.366874000 | -0.369066000 |
| 6 | 5.490367000  | -0.392379000 | -0.426477000 |
| 6 | 5.253805000  | 0.803367000  | -1.104323000 |
| 1 | 3.842757000  | 1.958123000  | -2.250852000 |
| 1 | 2.054678000  | 0.244028000  | -2.097452000 |
| 1 | 4.693121000  | -2.290398000 | 0.166663000  |
| 1 | 6.445287000  | -0.562732000 | 0.059146000  |
| 1 | 6.026474000  | 1.564650000  | -1.142994000 |
| 6 | 2.132804000  | -2.085986000 | -0.798512000 |
| 8 | 1.005593000  | -1.751443000 | -1.189045000 |
| 6 | 2.352569000  | -3.395791000 | -0.109748000 |
| 1 | 3.206674000  | -3.920135000 | -0.546634000 |
| 1 | 2.575572000  | -3.219842000 | 0.947947000  |
| 1 | 1.451551000  | -4.003949000 | -0.187968000 |
| 1 | -0.054489000 | -2.539620000 | 1.188630000  |

## TS11-12

| -----                   |              |              |              |
|-------------------------|--------------|--------------|--------------|
| Coordinates (Angstroms) |              |              |              |
|                         | X            | Y            | Z            |
| -----                   |              |              |              |
| 44                      | 0.004822000  | -1.519878000 | 0.104071000  |
| 7                       | 0.621576000  | 0.537686000  | 0.429764000  |
| 7                       | -1.167635000 | 0.870780000  | -2.106139000 |
| 8                       | 2.394346000  | 4.228572000  | 1.052670000  |
| 8                       | -4.572280000 | 2.609685000  | -0.487159000 |

|   |              |              |              |
|---|--------------|--------------|--------------|
| 6 | 1.654224000  | 0.728948000  | 1.281910000  |
| 1 | 2.029277000  | -0.154121000 | 1.781730000  |
| 6 | 2.238797000  | 1.948069000  | 1.525575000  |
| 1 | 3.073003000  | 2.030230000  | 2.211163000  |
| 6 | 1.761735000  | 3.067912000  | 0.839101000  |
| 6 | 0.657722000  | 2.901736000  | 0.002182000  |
| 1 | 0.203748000  | 3.735657000  | -0.517230000 |
| 6 | 0.107016000  | 1.634841000  | -0.161830000 |
| 6 | 1.980277000  | 5.371328000  | 0.302776000  |
| 1 | 2.083178000  | 5.186705000  | -0.770579000 |
| 1 | 2.648497000  | 6.177356000  | 0.601930000  |
| 1 | 0.947557000  | 5.642651000  | 0.539759000  |
| 6 | -1.165032000 | 1.532858000  | -0.940690000 |
| 6 | -2.285928000 | 2.145699000  | -0.399727000 |
| 1 | -2.232992000 | 2.681826000  | 0.541099000  |
| 6 | -3.509329000 | 2.021753000  | -1.066944000 |
| 6 | -3.541895000 | 1.295039000  | -2.258002000 |
| 1 | -4.453308000 | 1.146199000  | -2.822669000 |
| 6 | -2.346154000 | 0.759522000  | -2.723536000 |
| 1 | -2.344411000 | 0.210731000  | -3.661422000 |
| 6 | -5.847495000 | 2.439606000  | -1.102974000 |
| 1 | -5.860124000 | 2.870955000  | -2.108398000 |
| 1 | -6.555696000 | 2.972181000  | -0.469670000 |
| 1 | -6.119379000 | 1.380555000  | -1.148999000 |
| 6 | -2.284413000 | -1.265863000 | 0.401348000  |
| 1 | -2.893331000 | -0.397057000 | 0.184294000  |
| 6 | -2.112245000 | -2.244305000 | -0.568150000 |
| 1 | -2.576137000 | -2.126049000 | -1.541909000 |
| 6 | -1.258422000 | -3.372339000 | -0.327017000 |
| 6 | -0.644691000 | -3.487934000 | 0.935241000  |
| 1 | 0.015254000  | -4.325610000 | 1.131743000  |
| 6 | -0.811631000 | -2.479881000 | 1.933336000  |
| 1 | -0.287622000 | -2.578812000 | 2.875256000  |
| 6 | -1.593441000 | -1.337868000 | 1.662054000  |
| 6 | -1.797098000 | -0.210030000 | 2.652020000  |
| 6 | -0.771950000 | -0.180165000 | 3.782622000  |
| 6 | -3.224912000 | -0.288674000 | 3.209350000  |
| 1 | -1.708993000 | 0.721353000  | 2.080098000  |
| 1 | 0.253710000  | -0.192366000 | 3.403901000  |
| 1 | -0.904489000 | 0.732921000  | 4.369257000  |
| 1 | -0.897703000 | -1.031338000 | 4.460280000  |
| 1 | -3.973216000 | -0.235510000 | 2.412851000  |
| 1 | -3.372733000 | -1.225755000 | 3.756865000  |
| 1 | -3.404968000 | 0.541329000  | 3.898899000  |



|   |              |              |              |
|---|--------------|--------------|--------------|
| 6 | -1.064056000 | -4.399872000 | -1.401980000 |
| 1 | -2.007924000 | -4.923535000 | -1.582914000 |
| 1 | -0.759387000 | -3.924820000 | -2.338370000 |
| 1 | -0.311627000 | -5.136354000 | -1.114755000 |
| 6 | 4.057738000  | 1.339734000  | -1.483185000 |
| 6 | 3.080601000  | 0.360971000  | -1.630735000 |
| 6 | 3.136196000  | -0.810044000 | -0.871909000 |
| 6 | 4.185500000  | -0.995394000 | 0.031840000  |
| 6 | 5.160188000  | -0.014405000 | 0.181715000  |
| 6 | 5.097848000  | 1.155257000  | -0.574271000 |
| 1 | 4.003100000  | 2.249541000  | -2.072560000 |
| 1 | 2.260502000  | 0.503187000  | -2.325167000 |
| 1 | 4.228188000  | -1.890947000 | 0.644188000  |
| 1 | 5.964913000  | -0.158928000 | 0.895407000  |
| 1 | 5.856766000  | 1.921838000  | -0.453353000 |
| 6 | 2.056534000  | -1.847449000 | -1.054621000 |
| 8 | 1.040883000  | -1.515622000 | -1.781500000 |
| 6 | 2.492435000  | -3.298816000 | -1.057258000 |
| 1 | 3.135732000  | -3.444139000 | -1.932118000 |
| 1 | 3.060611000  | -3.568923000 | -0.166473000 |
| 1 | 1.623284000  | -3.950254000 | -1.140640000 |
| 1 | 1.534646000  | -1.827836000 | 0.552494000  |

12

Coordinates (Angstroms)

|    | X            | Y            | Z            |
|----|--------------|--------------|--------------|
| 44 | 1.413912000  | 0.618760000  | -0.107357000 |
| 7  | 0.116006000  | -0.811287000 | -0.932039000 |
| 7  | -0.463296000 | 1.574210000  | -0.086404000 |
| 8  | -2.567685000 | -3.592476000 | -2.334673000 |
| 8  | -4.238695000 | 3.194059000  | -0.229630000 |
| 6  | 0.487440000  | -2.064706000 | -1.239966000 |
| 1  | 1.527337000  | -2.314692000 | -1.065953000 |
| 6  | -0.393813000 | -3.000781000 | -1.731139000 |
| 1  | -0.065815000 | -4.009696000 | -1.948299000 |
| 6  | -1.732695000 | -2.635236000 | -1.910722000 |
| 6  | -2.117445000 | -1.324650000 | -1.622737000 |
| 1  | -3.142732000 | -1.005058000 | -1.743400000 |
| 6  | -1.168480000 | -0.448317000 | -1.119531000 |
| 6  | -3.957834000 | -3.281432000 | -2.441035000 |
| 1  | -4.356768000 | -2.951086000 | -1.477067000 |
| 1  | -4.444056000 | -4.208289000 | -2.741180000 |
| 1  | -4.129868000 | -2.514785000 | -3.202309000 |

|   |              |              |              |
|---|--------------|--------------|--------------|
| 6 | -1.494448000 | 0.919046000  | -0.664917000 |
| 6 | -2.757781000 | 1.471860000  | -0.730945000 |
| 1 | -3.585144000 | 0.955298000  | -1.199975000 |
| 6 | -2.989776000 | 2.718475000  | -0.138718000 |
| 6 | -1.935148000 | 3.361363000  | 0.513971000  |
| 1 | -2.051100000 | 4.312543000  | 1.015734000  |
| 6 | -0.694947000 | 2.748313000  | 0.507402000  |
| 1 | 0.149939000  | 3.210796000  | 1.002798000  |
| 6 | -4.526525000 | 4.451314000  | 0.384397000  |
| 1 | -4.350245000 | 4.405963000  | 1.463005000  |
| 1 | -5.582151000 | 4.637271000  | 0.192974000  |
| 1 | -3.924164000 | 5.248291000  | -0.061097000 |
| 6 | 2.982519000  | 0.183169000  | -1.601134000 |
| 1 | 2.914723000  | -0.612576000 | -2.336946000 |
| 6 | 2.465343000  | 1.458949000  | -1.928318000 |
| 1 | 2.027510000  | 1.635081000  | -2.903693000 |
| 6 | 2.438103000  | 2.476551000  | -0.943714000 |
| 6 | 2.963664000  | 2.196766000  | 0.350679000  |
| 1 | 2.909500000  | 2.950518000  | 1.126935000  |
| 6 | 3.511722000  | 0.926394000  | 0.636555000  |
| 1 | 3.840752000  | 0.725151000  | 1.649830000  |
| 6 | 3.555366000  | -0.107900000 | -0.332107000 |
| 6 | 4.234084000  | -1.439336000 | -0.093427000 |
| 6 | 4.007901000  | -2.013269000 | 1.303768000  |
| 6 | 5.731965000  | -1.283693000 | -0.391454000 |
| 1 | 3.815512000  | -2.143524000 | -0.822417000 |
| 1 | 2.944337000  | -2.160280000 | 1.503173000  |
| 1 | 4.505988000  | -2.983564000 | 1.388414000  |
| 1 | 4.421322000  | -1.364730000 | 2.082909000  |
| 1 | 5.898343000  | -0.905854000 | -1.405025000 |
| 1 | 6.191150000  | -0.581814000 | 0.313789000  |
| 1 | 6.241729000  | -2.247097000 | -0.295041000 |
| 6 | 1.852478000  | 3.817715000  | -1.264070000 |
| 1 | 2.589235000  | 4.395466000  | -1.831643000 |
| 1 | 0.955998000  | 3.719640000  | -1.880213000 |
| 1 | 1.608775000  | 4.376433000  | -0.359140000 |
| 6 | -3.343235000 | -0.639931000 | 1.982796000  |
| 6 | -1.972989000 | -0.450530000 | 2.147169000  |
| 6 | -1.075099000 | -1.492838000 | 1.910011000  |
| 6 | -1.582462000 | -2.739426000 | 1.533658000  |
| 6 | -2.951134000 | -2.935981000 | 1.369059000  |
| 6 | -3.837814000 | -1.881520000 | 1.586053000  |
| 1 | -4.026361000 | 0.187381000  | 2.153163000  |
| 1 | -1.590108000 | 0.525441000  | 2.430998000  |

|   |              |              |             |
|---|--------------|--------------|-------------|
| 1 | -0.891865000 | -3.558121000 | 1.344374000 |
| 1 | -3.325848000 | -3.905464000 | 1.053157000 |
| 1 | -4.904569000 | -2.027318000 | 1.445791000 |
| 6 | 0.430557000  | -1.298457000 | 2.077009000 |
| 8 | 0.873550000  | -0.002255000 | 1.813501000 |
| 6 | 0.834993000  | -1.668003000 | 3.510256000 |
| 1 | 0.353850000  | -0.989198000 | 4.223212000 |
| 1 | 0.540154000  | -2.693444000 | 3.756562000 |
| 1 | 1.920140000  | -1.579686000 | 3.627186000 |
| 1 | 0.908975000  | -2.032966000 | 1.405528000 |

13

Coordinates (Angstroms)

|    | X            | Y            | Z            |
|----|--------------|--------------|--------------|
| 44 | -0.229248000 | -1.189620000 | -0.411194000 |
| 7  | 1.230401000  | 0.051953000  | -1.223151000 |
| 7  | -0.867756000 | 0.643334000  | 0.207901000  |
| 8  | 4.167775000  | 2.656595000  | -2.438237000 |
| 8  | -1.815071000 | 4.488042000  | 1.339625000  |
| 6  | 2.320907000  | -0.367055000 | -1.884729000 |
| 1  | 2.390784000  | -1.432763000 | -2.067928000 |
| 6  | 3.307832000  | 0.493443000  | -2.307833000 |
| 1  | 4.180031000  | 0.123524000  | -2.832145000 |
| 6  | 3.173042000  | 1.859553000  | -2.030053000 |
| 6  | 2.034946000  | 2.302581000  | -1.350441000 |
| 1  | 1.895424000  | 3.348554000  | -1.116174000 |
| 6  | 1.087597000  | 1.366359000  | -0.962140000 |
| 6  | 4.087518000  | 4.051253000  | -2.138760000 |
| 1  | 3.217085000  | 4.503818000  | -2.622424000 |
| 1  | 4.999035000  | 4.491400000  | -2.539695000 |
| 1  | 4.044778000  | 4.213799000  | -1.057762000 |
| 6  | -0.121680000 | 1.709406000  | -0.183521000 |
| 6  | -0.451916000 | 2.997176000  | 0.184946000  |
| 1  | 0.135161000  | 3.847648000  | -0.136885000 |
| 6  | -1.553799000 | 3.213743000  | 1.020906000  |
| 6  | -2.275369000 | 2.108727000  | 1.475702000  |
| 1  | -3.115387000 | 2.196307000  | 2.151677000  |
| 6  | -1.892650000 | 0.852166000  | 1.041580000  |
| 1  | -2.420048000 | -0.030345000 | 1.377175000  |
| 6  | -2.922401000 | 4.752445000  | 2.202300000  |
| 1  | -3.856469000 | 4.403560000  | 1.752777000  |
| 1  | -2.952890000 | 5.834415000  | 2.320566000  |
| 1  | -2.775793000 | 4.280578000  | 3.178389000  |
| 6  | 3.495323000  | -0.991806000 | 1.073434000  |

|   |              |              |              |
|---|--------------|--------------|--------------|
| 1 | 4.388774000  | -1.219761000 | 0.497505000  |
| 6 | 3.259582000  | 0.319987000  | 1.479309000  |
| 1 | 3.974034000  | 1.096256000  | 1.216563000  |
| 6 | 2.107586000  | 0.659707000  | 2.192182000  |
| 6 | 1.208583000  | -0.364821000 | 2.502478000  |
| 1 | 0.298924000  | -0.131109000 | 3.050175000  |
| 6 | 1.453749000  | -1.680651000 | 2.114709000  |
| 1 | 0.737617000  | -2.453938000 | 2.381834000  |
| 6 | 2.590736000  | -2.013921000 | 1.367120000  |
| 1 | -0.828230000 | -0.921581000 | -1.814783000 |
| 6 | 2.817976000  | -3.429938000 | 0.869106000  |
| 6 | 1.677955000  | -3.892655000 | -0.049121000 |
| 6 | 3.006750000  | -4.416201000 | 2.027681000  |
| 1 | 3.741964000  | -3.420301000 | 0.278500000  |
| 1 | 1.513082000  | -3.179686000 | -0.868144000 |
| 1 | 1.906501000  | -4.866843000 | -0.493530000 |
| 1 | 0.739881000  | -3.990528000 | 0.507081000  |
| 1 | 3.842956000  | -4.122570000 | 2.669639000  |
| 1 | 2.104467000  | -4.465877000 | 2.647569000  |
| 1 | 3.205534000  | -5.422966000 | 1.646027000  |
| 6 | 1.842512000  | 2.081798000  | 2.611564000  |
| 1 | 2.145092000  | 2.785611000  | 1.829892000  |
| 1 | 0.780620000  | 2.239680000  | 2.820761000  |
| 1 | 2.402713000  | 2.338028000  | 3.518116000  |
| 6 | -4.770318000 | 0.061762000  | -2.062623000 |
| 6 | -3.605640000 | -0.690513000 | -1.953096000 |
| 6 | -3.332633000 | -1.407702000 | -0.784807000 |
| 6 | -4.258885000 | -1.379716000 | 0.260420000  |
| 6 | -5.428271000 | -0.630934000 | 0.149870000  |
| 6 | -5.684808000 | 0.095690000  | -1.009778000 |
| 1 | -4.964251000 | 0.624066000  | -2.970753000 |
| 1 | -2.889270000 | -0.703589000 | -2.769941000 |
| 1 | -4.053678000 | -1.938780000 | 1.168026000  |
| 1 | -6.138624000 | -0.615595000 | 0.970600000  |
| 1 | -6.593319000 | 0.683372000  | -1.095993000 |
| 6 | -2.080228000 | -2.229730000 | -0.632179000 |
| 8 | -1.625067000 | -2.429083000 | 0.575875000  |
| 6 | -1.890221000 | -3.340294000 | -1.647048000 |
| 1 | -2.620028000 | -4.134459000 | -1.447682000 |
| 1 | -2.046050000 | -2.980469000 | -2.666344000 |
| 1 | -0.885782000 | -3.766741000 | -1.564563000 |

-----  
**TS13-12**

-----  
Coordinates (Angstroms)  
-----

|    | X            | Y            | Z            |
|----|--------------|--------------|--------------|
| 44 | 0.370179000  | -1.187372000 | -0.190975000 |
| 7  | 1.205148000  | 0.570021000  | -0.963542000 |
| 7  | -0.962739000 | 0.222515000  | 0.416321000  |
| 8  | 2.763532000  | 4.182415000  | -2.192041000 |
| 8  | -3.625769000 | 3.231954000  | 1.292868000  |
| 6  | 2.377386000  | 0.660198000  | -1.613060000 |
| 1  | 2.898709000  | -0.273729000 | -1.786882000 |
| 6  | 2.906165000  | 1.857911000  | -2.039900000 |
| 1  | 3.856473000  | 1.890538000  | -2.558148000 |
| 6  | 2.200035000  | 3.037689000  | -1.778088000 |
| 6  | 0.975390000  | 2.954031000  | -1.113549000 |
| 1  | 0.394979000  | 3.839021000  | -0.892576000 |
| 6  | 0.513145000  | 1.702624000  | -0.727598000 |
| 6  | 2.082932000  | 5.408181000  | -1.923927000 |
| 1  | 1.112379000  | 5.434677000  | -2.428034000 |
| 1  | 2.723367000  | 6.192909000  | -2.323864000 |
| 1  | 1.950337000  | 5.555744000  | -0.847938000 |
| 6  | -0.750731000 | 1.498548000  | 0.007976000  |
| 6  | -1.645780000 | 2.507800000  | 0.305124000  |
| 1  | -1.487144000 | 3.523748000  | -0.033438000 |
| 6  | -2.784450000 | 2.214212000  | 1.063427000  |
| 6  | -2.962139000 | 0.911163000  | 1.535011000  |
| 1  | -3.802429000 | 0.620606000  | 2.151172000  |
| 6  | -2.022981000 | -0.042355000 | 1.188189000  |
| 1  | -2.120587000 | -1.065145000 | 1.527410000  |
| 6  | -4.815438000 | 2.961859000  | 2.035132000  |
| 1  | -5.420926000 | 2.200637000  | 1.534403000  |
| 1  | -5.362000000 | 3.903082000  | 2.067774000  |
| 1  | -4.575044000 | 2.641870000  | 3.053238000  |
| 6  | 3.701265000  | 0.081674000  | 1.128776000  |
| 1  | 4.644232000  | 0.308405000  | 0.638354000  |
| 6  | 2.966808000  | 1.118811000  | 1.714890000  |
| 1  | 3.355798000  | 2.132985000  | 1.673420000  |
| 6  | 1.733949000  | 0.882397000  | 2.311312000  |
| 6  | 1.265630000  | -0.442815000 | 2.338784000  |
| 1  | 0.332201000  | -0.667142000 | 2.847736000  |
| 6  | 2.002459000  | -1.484433000 | 1.768690000  |
| 1  | 1.663543000  | -2.508768000 | 1.897432000  |
| 6  | 3.229252000  | -1.224746000 | 1.123051000  |
| 1  | -0.539633000 | -1.486677000 | -1.543947000 |
| 6  | 3.981053000  | -2.337333000 | 0.420736000  |
| 6  | 3.062942000  | -3.133714000 | -0.517147000 |
| 6  | 4.666520000  | -3.268131000 | 1.428521000  |

|   |              |              |              |
|---|--------------|--------------|--------------|
| 1 | 4.759258000  | -1.863947000 | -0.189601000 |
| 1 | 2.500429000  | -2.467349000 | -1.187179000 |
| 1 | 3.648529000  | -3.817027000 | -1.140086000 |
| 1 | 2.339917000  | -3.732985000 | 0.046269000  |
| 1 | 5.361241000  | -2.714873000 | 2.067724000  |
| 1 | 3.925116000  | -3.753862000 | 2.072802000  |
| 1 | 5.227900000  | -4.052426000 | 0.910205000  |
| 6 | 0.916858000  | 1.994503000  | 2.913173000  |
| 1 | 1.080716000  | 2.936459000  | 2.381892000  |
| 1 | -0.151990000 | 1.761843000  | 2.877402000  |
| 1 | 1.182128000  | 2.156607000  | 3.964015000  |
| 6 | -4.304565000 | -0.548530000 | -1.811621000 |
| 6 | -3.004431000 | -1.037933000 | -1.882453000 |
| 6 | -2.596577000 | -2.083723000 | -1.052231000 |
| 6 | -3.515503000 | -2.657406000 | -0.174016000 |
| 6 | -4.820236000 | -2.172782000 | -0.106590000 |
| 6 | -5.214887000 | -1.111078000 | -0.916993000 |
| 1 | -4.604435000 | 0.280132000  | -2.445487000 |
| 1 | -2.287548000 | -0.577416000 | -2.558443000 |
| 1 | -3.198365000 | -3.463471000 | 0.479821000  |
| 1 | -5.524262000 | -2.616376000 | 0.590643000  |
| 1 | -6.225642000 | -0.720771000 | -0.850961000 |
| 6 | -1.161393000 | -2.590464000 | -1.055811000 |
| 8 | -0.692287000 | -3.002540000 | 0.124227000  |
| 6 | -0.816265000 | -3.493269000 | -2.237864000 |
| 1 | -1.356444000 | -4.437885000 | -2.119512000 |
| 1 | -1.106272000 | -3.039285000 | -3.188744000 |
| 1 | 0.258453000  | -3.695491000 | -2.245505000 |

14

Coordinates (Angstroms)

|    | X            | Y            | Z            |
|----|--------------|--------------|--------------|
| 44 | -1.117855000 | -0.273402000 | -0.175008000 |
| 7  | 0.718843000  | -0.992815000 | -0.903663000 |
| 7  | 0.231925000  | 1.266172000  | 0.308935000  |
| 8  | 4.435440000  | -2.517615000 | -1.803427000 |
| 8  | 3.167899000  | 3.978858000  | 1.297537000  |
| 6  | 0.875289000  | -2.177210000 | -1.520355000 |
| 1  | -0.032433000 | -2.717201000 | -1.759800000 |
| 6  | 2.109985000  | -2.696742000 | -1.834034000 |
| 1  | 2.198589000  | -3.659915000 | -2.320929000 |
| 6  | 3.254716000  | -1.961172000 | -1.503510000 |
| 6  | 3.098152000  | -0.714151000 | -0.896194000 |
| 1  | 3.954818000  | -0.107664000 | -0.637620000 |

|   |              |              |              |
|---|--------------|--------------|--------------|
| 6 | 1.814958000  | -0.264755000 | -0.611840000 |
| 6 | 5.627044000  | -1.798478000 | -1.482929000 |
| 1 | 5.668551000  | -0.850502000 | -2.027199000 |
| 1 | 6.449752000  | -2.438316000 | -1.798362000 |
| 1 | 5.695927000  | -1.617210000 | -0.406166000 |
| 6 | 1.540344000  | 1.031200000  | 0.042926000  |
| 6 | 2.522944000  | 1.945354000  | 0.370556000  |
| 1 | 3.567974000  | 1.760509000  | 0.156967000  |
| 6 | 2.165766000  | 3.141818000  | 1.002051000  |
| 6 | 0.817297000  | 3.378475000  | 1.278532000  |
| 1 | 0.470137000  | 4.280769000  | 1.764088000  |
| 6 | -0.103260000 | 2.413918000  | 0.911639000  |
| 1 | -1.158552000 | 2.562818000  | 1.106129000  |
| 6 | 2.848788000  | 5.207993000  | 1.951823000  |
| 1 | 2.198888000  | 5.825211000  | 1.324463000  |
| 1 | 3.800468000  | 5.714835000  | 2.103434000  |
| 1 | 2.372219000  | 5.022200000  | 2.918832000  |
| 6 | -2.000525000 | -0.498759000 | 1.957050000  |
| 1 | -1.633520000 | -0.031670000 | 2.865275000  |
| 6 | -2.888804000 | 0.241204000  | 1.114935000  |
| 1 | -3.194138000 | 1.239777000  | 1.407305000  |
| 6 | -3.380448000 | -0.310017000 | -0.085886000 |
| 6 | -2.899985000 | -1.599410000 | -0.478080000 |
| 1 | -3.221479000 | -2.034214000 | -1.416948000 |
| 6 | -1.972108000 | -2.281008000 | 0.332094000  |
| 1 | -1.577936000 | -3.228690000 | -0.020119000 |
| 6 | -1.544652000 | -1.773603000 | 1.603913000  |
| 1 | -1.190437000 | 0.389053000  | -1.641019000 |
| 6 | -0.647155000 | -2.579157000 | 2.518823000  |
| 6 | 0.642821000  | -3.049431000 | 1.841910000  |
| 6 | -1.438747000 | -3.764173000 | 3.086777000  |
| 1 | -0.371035000 | -1.921459000 | 3.350485000  |
| 1 | 1.242546000  | -2.202292000 | 1.496559000  |
| 1 | 1.243642000  | -3.625722000 | 2.552025000  |
| 1 | 0.437480000  | -3.696552000 | 0.982824000  |
| 1 | -2.346691000 | -3.426770000 | 3.595628000  |
| 1 | -1.731509000 | -4.454285000 | 2.287597000  |
| 1 | -0.828469000 | -4.320187000 | 3.804769000  |
| 6 | -4.377036000 | 0.420584000  | -0.934482000 |
| 1 | -5.380016000 | 0.037358000  | -0.720530000 |
| 1 | -4.367413000 | 1.491451000  | -0.722827000 |
| 1 | -4.175979000 | 0.263949000  | -1.996191000 |
| 8 | -2.126657000 | 2.749540000  | -1.636226000 |
| 1 | -2.556490000 | 3.047273000  | -0.819075000 |

|   |              |             |              |
|---|--------------|-------------|--------------|
| 1 | -2.871803000 | 2.691225000 | -2.426085000 |
| 1 | -1.783544000 | 1.831525000 | -1.454558000 |
| 8 | -3.763214000 | 2.601939000 | -3.443726000 |
| 1 | -3.802791000 | 3.442411000 | -3.918920000 |
| 1 | -4.646563000 | 2.471798000 | -3.074140000 |

**TS14-15**

Coordinates (Angstroms)

|    | X            | Y            | Z            |
|----|--------------|--------------|--------------|
| 44 | -1.161821000 | -0.205691000 | -0.130910000 |
| 7  | 0.599735000  | -1.079830000 | -0.847160000 |
| 7  | 0.293123000  | 1.249422000  | 0.259078000  |
| 8  | 4.163474000  | -2.863598000 | -1.853670000 |
| 8  | 3.390194000  | 3.849133000  | 0.996234000  |
| 6  | 0.650696000  | -2.300948000 | -1.407110000 |
| 1  | -0.298421000 | -2.794014000 | -1.576136000 |
| 6  | 1.835522000  | -2.906703000 | -1.753977000 |
| 1  | 1.841543000  | -3.894419000 | -2.197521000 |
| 6  | 3.037045000  | -2.226857000 | -1.518001000 |
| 6  | 2.986533000  | -0.947148000 | -0.960140000 |
| 1  | 3.889453000  | -0.384288000 | -0.769367000 |
| 6  | 1.749514000  | -0.407683000 | -0.639745000 |
| 6  | 5.413010000  | -2.210516000 | -1.619136000 |
| 1  | 5.479963000  | -1.281042000 | -2.191650000 |
| 1  | 6.175005000  | -2.908308000 | -1.962204000 |
| 1  | 5.551355000  | -2.008550000 | -0.553026000 |
| 6  | 1.575814000  | 0.929949000  | -0.038727000 |
| 6  | 2.613536000  | 1.805931000  | 0.205472000  |
| 1  | 3.639153000  | 1.557224000  | -0.036222000 |
| 6  | 2.338341000  | 3.053046000  | 0.780856000  |
| 6  | 1.012558000  | 3.377200000  | 1.081651000  |
| 1  | 0.728056000  | 4.322557000  | 1.523297000  |
| 6  | 0.030839000  | 2.446505000  | 0.796713000  |
| 1  | -1.009882000 | 2.661926000  | 1.007270000  |
| 6  | 3.161837000  | 5.125177000  | 1.598510000  |
| 1  | 2.525479000  | 5.746653000  | 0.961852000  |
| 1  | 4.144421000  | 5.583874000  | 1.695970000  |
| 1  | 2.708854000  | 5.010680000  | 2.587322000  |
| 6  | -2.056128000 | -0.074386000 | 1.948507000  |
| 1  | -1.686253000 | 0.572391000  | 2.737702000  |
| 6  | -3.004775000 | 0.441329000  | 1.028575000  |
| 1  | -3.365636000 | 1.457355000  | 1.138535000  |
| 6  | -3.448546000 | -0.347544000 | -0.058207000 |
| 6  | -2.907802000 | -1.656368000 | -0.216987000 |



|   |              |              |              |
|---|--------------|--------------|--------------|
| 1 | -3.197602000 | -2.260181000 | -1.068389000 |
| 6 | -1.953292000 | -2.141450000 | 0.697057000  |
| 1 | -1.506586000 | -3.113915000 | 0.515295000  |
| 6 | -1.516681000 | -1.373092000 | 1.816162000  |
| 1 | -1.174092000 | 0.329455000  | -1.739526000 |
| 6 | -0.553736000 | -1.937826000 | 2.839262000  |
| 6 | 0.755489000  | -2.440583000 | 2.226433000  |
| 6 | -1.261711000 | -3.046265000 | 3.629011000  |
| 1 | -0.312972000 | -1.123939000 | 3.531273000  |
| 1 | 1.311969000  | -1.623479000 | 1.759505000  |
| 1 | 1.384850000  | -2.875005000 | 3.008718000  |
| 1 | 0.581417000  | -3.213819000 | 1.470542000  |
| 1 | -2.184624000 | -2.679510000 | 4.088193000  |
| 1 | -1.515387000 | -3.887937000 | 2.975147000  |
| 1 | -0.608372000 | -3.419758000 | 4.422974000  |
| 6 | -4.429230000 | 0.197049000  | -1.048876000 |
| 1 | -5.443501000 | -0.051478000 | -0.720315000 |
| 1 | -4.348516000 | 1.282391000  | -1.122351000 |
| 1 | -4.272323000 | -0.245080000 | -2.034992000 |
| 8 | -1.973058000 | 2.477909000  | -1.796572000 |
| 1 | -2.454006000 | 2.685646000  | -0.983786000 |
| 1 | -2.664161000 | 2.404340000  | -2.512533000 |
| 1 | -1.516013000 | 1.191102000  | -1.576907000 |
| 8 | -3.719448000 | 2.281387000  | -3.779551000 |
| 1 | -4.223205000 | 3.103372000  | -3.799784000 |
| 1 | -4.372139000 | 1.607479000  | -3.557603000 |

15

-----  
Coordinates (Angstroms)

|    | X            | Y            | Z            |
|----|--------------|--------------|--------------|
| 44 | -1.199237000 | -0.215954000 | -0.148469000 |
| 7  | 0.538645000  | -1.204895000 | -0.738630000 |
| 7  | 0.254391000  | 1.278310000  | -0.074994000 |
| 8  | 4.062475000  | -3.190308000 | -1.432333000 |
| 8  | 3.373034000  | 3.912015000  | 0.352725000  |
| 6  | 0.561915000  | -2.497510000 | -1.108988000 |
| 1  | -0.398436000 | -2.987390000 | -1.211035000 |
| 6  | 1.736055000  | -3.171879000 | -1.344719000 |
| 1  | 1.724603000  | -4.214106000 | -1.637821000 |
| 6  | 2.951067000  | -2.488724000 | -1.199249000 |
| 6  | 2.926748000  | -1.138713000 | -0.834341000 |
| 1  | 3.840387000  | -0.571692000 | -0.723977000 |
| 6  | 1.700481000  | -0.531699000 | -0.614838000 |
| 6  | 5.326428000  | -2.530342000 | -1.322567000 |

|   |              |              |              |
|---|--------------|--------------|--------------|
| 1 | 5.396833000  | -1.710882000 | -2.043619000 |
| 1 | 6.072920000  | -3.288168000 | -1.552929000 |
| 1 | 5.481411000  | -2.155182000 | -0.307126000 |
| 6 | 1.541008000  | 0.888637000  | -0.246887000 |
| 6 | 2.586531000  | 1.775011000  | -0.103461000 |
| 1 | 3.616637000  | 1.468151000  | -0.233104000 |
| 6 | 2.313000000  | 3.111357000  | 0.218825000  |
| 6 | 0.981547000  | 3.509190000  | 0.372304000  |
| 1 | 0.700766000  | 4.526426000  | 0.608999000  |
| 6 | -0.008221000 | 2.557239000  | 0.218118000  |
| 1 | -1.052394000 | 2.818165000  | 0.338539000  |
| 6 | 3.151708000  | 5.282899000  | 0.693918000  |
| 1 | 2.586804000  | 5.790652000  | -0.092797000 |
| 1 | 4.141918000  | 5.726998000  | 0.780673000  |
| 1 | 2.627312000  | 5.365124000  | 1.649931000  |
| 6 | -1.925162000 | 0.382112000  | 1.877897000  |
| 1 | -1.525177000 | 1.228613000  | 2.427695000  |
| 6 | -3.010603000 | 0.587396000  | 1.002353000  |
| 1 | -3.451760000 | 1.572606000  | 0.909002000  |
| 6 | -3.476090000 | -0.472435000 | 0.185160000  |
| 6 | -2.853328000 | -1.747102000 | 0.296218000  |
| 1 | -3.175203000 | -2.559360000 | -0.344052000 |
| 6 | -1.778501000 | -1.937681000 | 1.183293000  |
| 1 | -1.275003000 | -2.897934000 | 1.184802000  |
| 6 | -1.266310000 | -0.872983000 | 1.981346000  |
| 1 | -1.357109000 | -0.198208000 | -1.968014000 |
| 6 | -0.132508000 | -1.037521000 | 2.970875000  |
| 6 | 0.828478000  | -2.179128000 | 2.644194000  |
| 6 | -0.736584000 | -1.214443000 | 4.370969000  |
| 1 | 0.430871000  | -0.097574000 | 2.954417000  |
| 1 | 1.267396000  | -2.076714000 | 1.648067000  |
| 1 | 1.644356000  | -2.178463000 | 3.372049000  |
| 1 | 0.334700000  | -3.154092000 | 2.708627000  |
| 1 | -1.395596000 | -0.380717000 | 4.631451000  |
| 1 | -1.318856000 | -2.140914000 | 4.422824000  |
| 1 | 0.058607000  | -1.267933000 | 5.119942000  |
| 6 | -4.579890000 | -0.247015000 | -0.798089000 |
| 1 | -5.538333000 | -0.390649000 | -0.288491000 |
| 1 | -4.551205000 | 0.770257000  | -1.191460000 |
| 1 | -4.520556000 | -0.959259000 | -1.623083000 |
| 8 | -2.530751000 | 2.597009000  | -2.185593000 |
| 1 | -2.842010000 | 2.341486000  | -1.311063000 |
| 1 | -2.934209000 | 1.932924000  | -2.779674000 |
| 1 | -1.504891000 | 0.573598000  | -1.796174000 |

|   |              |              |              |
|---|--------------|--------------|--------------|
| 8 | -3.557432000 | 0.621405000  | -3.861604000 |
| 1 | -4.493251000 | 0.575803000  | -3.634542000 |
| 1 | -3.181598000 | -0.154455000 | -3.429606000 |

---

16

---

Coordinates (Angstroms)

|    | X            | Y            | Z            |
|----|--------------|--------------|--------------|
| 44 | -1.494087000 | -0.092935000 | 0.243527000  |
| 7  | -0.058327000 | -0.853040000 | -1.076695000 |
| 7  | 0.247234000  | -0.161261000 | 1.408649000  |
| 8  | 2.791256000  | -2.579217000 | -3.496748000 |
| 8  | 3.791737000  | -0.599809000 | 3.458935000  |
| 6  | -0.277654000 | -1.088010000 | -2.381867000 |
| 1  | -1.249571000 | -0.800450000 | -2.764771000 |
| 6  | 0.666055000  | -1.661132000 | -3.203962000 |
| 1  | 0.458415000  | -1.829735000 | -4.253372000 |
| 6  | 1.903343000  | -2.025490000 | -2.658743000 |
| 6  | 2.139623000  | -1.779028000 | -1.306713000 |
| 1  | 3.088573000  | -2.023382000 | -0.850868000 |
| 6  | 1.140916000  | -1.174760000 | -0.553645000 |
| 6  | 4.078988000  | -2.924862000 | -2.985776000 |
| 1  | 4.595546000  | -2.038546000 | -2.605133000 |
| 1  | 4.629563000  | -3.335936000 | -3.830361000 |
| 1  | 3.997887000  | -3.679711000 | -2.197948000 |
| 6  | 1.321107000  | -0.775301000 | 0.855631000  |
| 6  | 2.501432000  | -0.942929000 | 1.553675000  |
| 1  | 3.361356000  | -1.430715000 | 1.113330000  |
| 6  | 2.609717000  | -0.429544000 | 2.849829000  |
| 6  | 1.511591000  | 0.231076000  | 3.405203000  |
| 1  | 1.530603000  | 0.662518000  | 4.397081000  |
| 6  | 0.358595000  | 0.333613000  | 2.647005000  |
| 1  | -0.519130000 | 0.830443000  | 3.042735000  |
| 6  | 3.957827000  | -0.047872000 | 4.765394000  |
| 1  | 3.812242000  | 1.036332000  | 4.750123000  |
| 1  | 4.983102000  | -0.274941000 | 5.053127000  |
| 1  | 3.265248000  | -0.508877000 | 5.475598000  |
| 6  | -2.894737000 | -1.034307000 | 1.806336000  |
| 1  | -2.608239000 | -1.424247000 | 2.778442000  |
| 6  | -3.156128000 | 0.364385000  | 1.682862000  |
| 1  | -3.088852000 | 1.002645000  | 2.556075000  |
| 6  | -3.486451000 | 0.924390000  | 0.425338000  |
| 6  | -3.511008000 | 0.063643000  | -0.711630000 |
| 1  | -3.716257000 | 0.470910000  | -1.694395000 |
| 6  | -3.189390000 | -1.305627000 | -0.565647000 |

|   |              |              |              |
|---|--------------|--------------|--------------|
| 1 | -3.135470000 | -1.917730000 | -1.460959000 |
| 6 | -2.951295000 | -1.907695000 | 0.706381000  |
| 1 | -0.932085000 | 1.318078000  | -0.215144000 |
| 6 | -2.690849000 | -3.393622000 | 0.839026000  |
| 6 | -1.454479000 | -3.835866000 | 0.048472000  |
| 6 | -3.930369000 | -4.191172000 | 0.416375000  |
| 1 | -2.502318000 | -3.589369000 | 1.900417000  |
| 1 | -0.558500000 | -3.314725000 | 0.398246000  |
| 1 | -1.294990000 | -4.911773000 | 0.169970000  |
| 1 | -1.570344000 | -3.632090000 | -1.022006000 |
| 1 | -4.814061000 | -3.887369000 | 0.985861000  |
| 1 | -4.143186000 | -4.042525000 | -0.648071000 |
| 1 | -3.767974000 | -5.260601000 | 0.581346000  |
| 6 | -3.774536000 | 2.388727000  | 0.272595000  |
| 1 | -4.836414000 | 2.578637000  | 0.458897000  |
| 1 | -3.189189000 | 2.980965000  | 0.978657000  |
| 1 | -3.542462000 | 2.711093000  | -0.744812000 |
| 6 | 3.296597000  | 1.256179000  | -1.718051000 |
| 6 | 2.047077000  | 1.810115000  | -1.961846000 |
| 6 | 1.407034000  | 2.553628000  | -0.958868000 |
| 6 | 2.019265000  | 2.714460000  | 0.297247000  |
| 6 | 3.258947000  | 2.145494000  | 0.535594000  |
| 6 | 3.899294000  | 1.421830000  | -0.473068000 |
| 1 | 3.794945000  | 0.686960000  | -2.494966000 |
| 1 | 1.579149000  | 1.668265000  | -2.929644000 |
| 1 | 1.514320000  | 3.272964000  | 1.077023000  |
| 1 | 3.728078000  | 2.256425000  | 1.507061000  |
| 1 | 4.869996000  | 0.975845000  | -0.281889000 |
| 6 | 0.122920000  | 3.186385000  | -1.223273000 |
| 8 | -0.308006000 | 4.001073000  | -0.351642000 |
| 6 | -0.629501000 | 2.955678000  | -2.483095000 |
| 1 | -0.082528000 | 3.431883000  | -3.304702000 |
| 1 | -0.692735000 | 1.886036000  | -2.694877000 |
| 1 | -1.628880000 | 3.383907000  | -2.424097000 |
| 8 | -2.315225000 | 5.382102000  | -0.860977000 |
| 1 | -2.078517000 | 5.924687000  | -1.624547000 |
| 1 | -1.194134000 | 4.508138000  | -0.594430000 |
| 1 | -3.087406000 | 4.877727000  | -1.147067000 |

**TS16-17**

-----  
Coordinates (Angstroms)

|    | X           | Y           | Z            |
|----|-------------|-------------|--------------|
| 44 | 1.441716000 | 0.045189000 | 0.269057000  |
| 7  | 0.080207000 | 1.093305000 | -0.916768000 |

|   |              |              |              |
|---|--------------|--------------|--------------|
| 7 | -0.355185000 | -0.150105000 | 1.325310000  |
| 8 | -2.667012000 | 3.273305000  | -3.071455000 |
| 8 | -4.037452000 | -0.274454000 | 3.158045000  |
| 6 | 0.381496000  | 1.647053000  | -2.104944000 |
| 1 | 1.388904000  | 1.485587000  | -2.468976000 |
| 6 | -0.526055000 | 2.376740000  | -2.837105000 |
| 1 | -0.250632000 | 2.804814000  | -3.792899000 |
| 6 | -1.816745000 | 2.558156000  | -2.323099000 |
| 6 | -2.136256000 | 1.984569000  | -1.093054000 |
| 1 | -3.124518000 | 2.088597000  | -0.668465000 |
| 6 | -1.165533000 | 1.246932000  | -0.428114000 |
| 6 | -4.007456000 | 3.433979000  | -2.605485000 |
| 1 | -4.497567000 | 2.462177000  | -2.491473000 |
| 1 | -4.517835000 | 4.013618000  | -3.373086000 |
| 1 | -4.028898000 | 3.979655000  | -1.657698000 |
| 6 | -1.421023000 | 0.529959000  | 0.836278000  |
| 6 | -2.649865000 | 0.500227000  | 1.463480000  |
| 1 | -3.504424000 | 1.035376000  | 1.070160000  |
| 6 | -2.811812000 | -0.271637000 | 2.619095000  |
| 6 | -1.716138000 | -0.983805000 | 3.111270000  |
| 1 | -1.772719000 | -1.605841000 | 3.994642000  |
| 6 | -0.515847000 | -0.888956000 | 2.428775000  |
| 1 | 0.358479000  | -1.426059000 | 2.776762000  |
| 6 | -4.263121000 | -1.071769000 | 4.321102000  |
| 1 | -4.069247000 | -2.127865000 | 4.111252000  |
| 1 | -5.313849000 | -0.933357000 | 4.570703000  |
| 1 | -3.638315000 | -0.732808000 | 5.152488000  |
| 6 | 2.703260000  | 0.609066000  | 2.065384000  |
| 1 | 2.331406000  | 0.772916000  | 3.072035000  |
| 6 | 3.029487000  | -0.719233000 | 1.665702000  |
| 1 | 2.927629000  | -1.533901000 | 2.373055000  |
| 6 | 3.453236000  | -0.984854000 | 0.344087000  |
| 6 | 3.508941000  | 0.097880000  | -0.583833000 |
| 1 | 3.775789000  | -0.088125000 | -1.617297000 |
| 6 | 3.155677000  | 1.400619000  | -0.167422000 |
| 1 | 3.139150000  | 2.193481000  | -0.908970000 |
| 6 | 2.800927000  | 1.702274000  | 1.182327000  |
| 1 | 0.871745000  | -1.239408000 | -0.560626000 |
| 6 | 2.501723000  | 3.118616000  | 1.625600000  |
| 6 | 1.351175000  | 3.754065000  | 0.839982000  |
| 6 | 3.775237000  | 3.968194000  | 1.532100000  |
| 1 | 2.203972000  | 3.064773000  | 2.678522000  |
| 1 | 0.419687000  | 3.200460000  | 0.988941000  |
| 1 | 1.193994000  | 4.783327000  | 1.176795000  |

|   |              |              |              |
|---|--------------|--------------|--------------|
| 1 | 1.563508000  | 3.781796000  | -0.234246000 |
| 1 | 4.596987000  | 3.517103000  | 2.096624000  |
| 1 | 4.096569000  | 4.076021000  | 0.490183000  |
| 1 | 3.593661000  | 4.969213000  | 1.934733000  |
| 6 | 3.802974000  | -2.374238000 | -0.087009000 |
| 1 | 4.861937000  | -2.561110000 | 0.119981000  |
| 1 | 3.212047000  | -3.114950000 | 0.455376000  |
| 1 | 3.641006000  | -2.499055000 | -1.158270000 |
| 6 | -3.276285000 | -1.124475000 | -1.823080000 |
| 6 | -1.928228000 | -1.349175000 | -2.082247000 |
| 6 | -1.188909000 | -2.194367000 | -1.246860000 |
| 6 | -1.807164000 | -2.791494000 | -0.136810000 |
| 6 | -3.147417000 | -2.553945000 | 0.121219000  |
| 6 | -3.885794000 | -1.723282000 | -0.724684000 |
| 1 | -3.845607000 | -0.470557000 | -2.475089000 |
| 1 | -1.463809000 | -0.865467000 | -2.934745000 |
| 1 | -1.230232000 | -3.432084000 | 0.520292000  |
| 1 | -3.619043000 | -3.006633000 | 0.986971000  |
| 1 | -4.935406000 | -1.538387000 | -0.520421000 |
| 6 | 0.215980000  | -2.514492000 | -1.551461000 |
| 8 | 0.678094000  | -3.567660000 | -0.961450000 |
| 6 | 0.889347000  | -2.039102000 | -2.798841000 |
| 1 | 0.507072000  | -2.646595000 | -3.627970000 |
| 1 | 0.681147000  | -0.990331000 | -3.001967000 |
| 1 | 1.966812000  | -2.186605000 | -2.721834000 |
| 8 | 2.668765000  | -4.776967000 | -2.009714000 |
| 1 | 3.127950000  | -4.222920000 | -2.653180000 |
| 1 | 1.536557000  | -3.940014000 | -1.368272000 |
| 1 | 3.331432000  | -4.952369000 | -1.329850000 |

-----  
**17**  
 -----

Coordinates (Angstroms)

|    | X            | Y            | Z            |
|----|--------------|--------------|--------------|
| 44 | 1.436203000  | -0.368137000 | -0.190026000 |
| 7  | 0.000764000  | -0.707933000 | 1.306741000  |
| 7  | -0.359038000 | -0.588312000 | -1.271527000 |
| 8  | -2.925690000 | -1.162628000 | 4.151316000  |
| 8  | -4.039645000 | -0.884414000 | -3.059702000 |
| 6  | 0.280883000  | -0.695357000 | 2.622737000  |
| 1  | 1.318143000  | -0.544609000 | 2.895676000  |
| 6  | -0.687357000 | -0.847610000 | 3.586363000  |
| 1  | -0.431765000 | -0.818098000 | 4.638063000  |
| 6  | -2.016088000 | -1.035835000 | 3.182953000  |
| 6  | -2.307452000 | -1.071830000 | 1.816309000  |

|   |              |              |              |
|---|--------------|--------------|--------------|
| 1 | -3.320665000 | -1.207642000 | 1.465196000  |
| 6 | -1.275662000 | -0.889906000 | 0.910887000  |
| 6 | -4.301238000 | -1.296997000 | 3.783373000  |
| 1 | -4.635457000 | -0.424059000 | 3.214882000  |
| 1 | -4.849167000 | -1.356987000 | 4.722040000  |
| 1 | -4.460304000 | -2.210816000 | 3.204674000  |
| 6 | -1.482083000 | -0.829500000 | -0.551196000 |
| 6 | -2.711519000 | -0.956273000 | -1.157363000 |
| 1 | -3.613204000 | -1.149391000 | -0.591026000 |
| 6 | -2.812549000 | -0.783826000 | -2.545107000 |
| 6 | -1.656222000 | -0.507201000 | -3.278148000 |
| 1 | -1.667262000 | -0.350999000 | -4.348435000 |
| 6 | -0.456143000 | -0.425925000 | -2.596234000 |
| 1 | 0.464803000  | -0.214632000 | -3.126206000 |
| 6 | -4.211893000 | -0.633210000 | -4.456722000 |
| 1 | -3.913001000 | 0.390265000  | -4.700713000 |
| 1 | -5.275935000 | -0.762696000 | -4.646824000 |
| 1 | -3.641123000 | -1.347786000 | -5.055928000 |
| 6 | 2.638081000  | -1.464019000 | -1.666326000 |
| 1 | 2.246638000  | -1.859947000 | -2.597815000 |
| 6 | 3.142993000  | -0.151197000 | -1.634086000 |
| 1 | 3.145306000  | 0.449263000  | -2.536019000 |
| 6 | 3.531152000  | 0.434754000  | -0.397033000 |
| 6 | 3.456725000  | -0.340389000 | 0.788777000  |
| 1 | 3.695575000  | 0.114335000  | 1.742635000  |
| 6 | 2.931959000  | -1.650390000 | 0.746510000  |
| 1 | 2.778504000  | -2.180196000 | 1.680768000  |
| 6 | 2.496380000  | -2.243762000 | -0.477494000 |
| 1 | 1.156900000  | 2.189285000  | -0.196516000 |
| 6 | 1.952819000  | -3.654137000 | -0.537751000 |
| 6 | 0.857551000  | -3.934804000 | 0.491965000  |
| 6 | 3.126993000  | -4.630783000 | -0.387828000 |
| 1 | 1.519202000  | -3.783807000 | -1.535005000 |
| 1 | -0.008522000 | -3.288124000 | 0.332841000  |
| 1 | 0.528123000  | -4.973324000 | 0.396168000  |
| 1 | 1.211283000  | -3.792218000 | 1.517931000  |
| 1 | 3.895181000  | -4.452140000 | -1.146153000 |
| 1 | 3.589382000  | -4.530726000 | 0.600144000  |
| 1 | 2.770769000  | -5.659098000 | -0.496434000 |
| 6 | 3.952458000  | 1.867621000  | -0.347882000 |
| 1 | 4.991721000  | 1.943062000  | -0.684721000 |
| 1 | 3.336914000  | 2.477634000  | -1.012491000 |
| 1 | 3.888899000  | 2.261010000  | 0.667099000  |
| 6 | -3.081426000 | 2.134349000  | 1.053951000  |

|   |              |             |              |
|---|--------------|-------------|--------------|
| 6 | -1.723535000 | 2.378987000 | 1.268194000  |
| 6 | -0.876196000 | 2.668058000 | 0.199412000  |
| 6 | -1.414890000 | 2.693336000 | -1.094397000 |
| 6 | -2.766203000 | 2.455571000 | -1.310527000 |
| 6 | -3.608285000 | 2.178625000 | -0.231611000 |
| 1 | -3.723368000 | 1.903289000 | 1.899040000  |
| 1 | -1.333263000 | 2.327788000 | 2.279792000  |
| 1 | -0.762231000 | 2.901532000 | -1.937729000 |
| 1 | -3.164470000 | 2.474886000 | -2.320629000 |
| 1 | -4.663578000 | 1.986826000 | -0.398607000 |
| 6 | 0.604563000  | 2.962443000 | 0.369695000  |
| 8 | 0.851088000  | 4.222269000 | -0.238916000 |
| 6 | 1.104937000  | 2.939016000 | 1.806320000  |
| 1 | 0.582676000  | 3.683906000 | 2.414626000  |
| 1 | 0.970994000  | 1.953439000 | 2.261263000  |
| 1 | 2.173064000  | 3.172307000 | 1.823921000  |
| 8 | 3.463323000  | 5.090071000 | 0.118428000  |
| 1 | 3.795903000  | 4.626785000 | 0.895828000  |
| 1 | 1.796977000  | 4.442807000 | -0.118001000 |
| 1 | 3.996228000  | 4.739346000 | -0.604144000 |

18

Coordinates (Angstroms)

|    | X            | Y            | Z            |
|----|--------------|--------------|--------------|
| 44 | -1.227031000 | 0.170242000  | -0.475322000 |
| 7  | 0.331238000  | -1.208254000 | -0.743217000 |
| 7  | 0.502160000  | 1.294880000  | -0.047424000 |
| 8  | 3.435503000  | -3.900528000 | -0.976420000 |
| 8  | 4.031114000  | 3.111316000  | 1.041587000  |
| 6  | 0.145914000  | -2.480537000 | -1.136091000 |
| 1  | -0.868686000 | -2.761305000 | -1.389193000 |
| 6  | 1.172492000  | -3.392055000 | -1.217018000 |
| 1  | 0.984285000  | -4.411255000 | -1.530818000 |
| 6  | 2.468934000  | -2.978164000 | -0.887358000 |
| 6  | 2.672351000  | -1.652384000 | -0.500263000 |
| 1  | 3.659876000  | -1.290500000 | -0.250534000 |
| 6  | 1.578655000  | -0.797882000 | -0.439447000 |
| 6  | 4.771166000  | -3.522218000 | -0.639219000 |
| 1  | 5.135462000  | -2.741209000 | -1.313039000 |
| 1  | 5.370311000  | -4.422539000 | -0.764735000 |
| 1  | 4.830810000  | -3.182463000 | 0.398763000  |
| 6  | 1.678751000  | 0.621484000  | -0.040058000 |
| 6  | 2.861554000  | 1.234830000  | 0.324095000  |
| 1  | 3.803202000  | 0.701072000  | 0.335117000  |



|   |              |              |              |
|---|--------------|--------------|--------------|
| 6 | 2.850568000  | 2.583880000  | 0.696327000  |
| 6 | 1.636484000  | 3.274552000  | 0.684275000  |
| 1 | 1.555496000  | 4.318442000  | 0.956342000  |
| 6 | 0.498683000  | 2.586807000  | 0.303613000  |
| 1 | -0.462129000 | 3.086790000  | 0.281833000  |
| 6 | 4.068197000  | 4.482560000  | 1.440498000  |
| 1 | 3.736441000  | 5.134705000  | 0.627461000  |
| 1 | 5.111067000  | 4.691155000  | 1.674000000  |
| 1 | 3.451207000  | 4.644703000  | 2.328813000  |
| 6 | -2.333918000 | 0.702561000  | 1.486475000  |
| 1 | -1.921257000 | 1.227405000  | 2.341952000  |
| 6 | -2.856299000 | 1.466380000  | 0.396721000  |
| 1 | -2.849015000 | 2.549023000  | 0.453893000  |
| 6 | -3.383758000 | 0.835594000  | -0.747923000 |
| 6 | -3.307332000 | -0.591604000 | -0.821514000 |
| 1 | -3.657560000 | -1.106586000 | -1.707973000 |
| 6 | -2.734104000 | -1.321563000 | 0.236566000  |
| 1 | -2.635571000 | -2.396696000 | 0.128196000  |
| 6 | -2.287001000 | -0.695856000 | 1.446846000  |
| 1 | -0.915024000 | 0.441732000  | -2.042443000 |
| 6 | -1.782467000 | -1.509702000 | 2.619396000  |
| 6 | -0.642745000 | -2.461391000 | 2.246575000  |
| 6 | -2.954164000 | -2.271381000 | 3.252683000  |
| 1 | -1.399995000 | -0.796215000 | 3.357448000  |
| 1 | 0.220373000  | -1.914587000 | 1.856502000  |
| 1 | -0.322853000 | -3.018043000 | 3.132669000  |
| 1 | -0.955953000 | -3.190111000 | 1.491811000  |
| 1 | -3.761118000 | -1.591258000 | 3.541127000  |
| 1 | -3.362209000 | -3.009526000 | 2.553179000  |
| 1 | -2.617999000 | -2.803249000 | 4.147758000  |
| 6 | -4.003006000 | 1.626798000  | -1.860721000 |
| 1 | -5.087494000 | 1.661584000  | -1.714603000 |
| 1 | -3.627551000 | 2.652349000  | -1.871492000 |
| 1 | -3.806092000 | 1.162493000  | -2.829332000 |
| 8 | -0.997232000 | 2.760868000  | -2.708661000 |
| 1 | -1.198049000 | 3.420828000  | -2.021380000 |
| 1 | -1.710586000 | 2.795190000  | -3.371170000 |
| 1 | -1.012642000 | 1.833517000  | -2.270311000 |

**TS18-19**

-----  
Coordinates (Angstroms)

|    | X            | Y            | Z            |
|----|--------------|--------------|--------------|
| 44 | -1.240157000 | 0.167533000  | -0.470901000 |
| 7  | 0.319355000  | -1.202679000 | -0.733775000 |

|   |              |              |              |
|---|--------------|--------------|--------------|
| 7 | 0.475704000  | 1.297162000  | -0.042263000 |
| 8 | 3.420120000  | -3.892105000 | -0.947142000 |
| 8 | 4.004031000  | 3.171020000  | 0.927997000  |
| 6 | 0.131861000  | -2.475945000 | -1.121220000 |
| 1 | -0.882507000 | -2.757180000 | -1.374295000 |
| 6 | 1.159350000  | -3.386354000 | -1.195953000 |
| 1 | 0.972306000  | -4.407368000 | -1.504194000 |
| 6 | 2.455242000  | -2.969822000 | -0.866128000 |
| 6 | 2.659115000  | -1.640554000 | -0.487348000 |
| 1 | 3.646108000  | -1.275563000 | -0.239437000 |
| 6 | 1.565581000  | -0.787467000 | -0.432761000 |
| 6 | 4.757386000  | -3.513472000 | -0.614517000 |
| 1 | 5.122400000  | -2.740874000 | -1.297382000 |
| 1 | 5.353443000  | -4.416982000 | -0.730917000 |
| 1 | 4.818008000  | -3.163021000 | 0.419701000  |
| 6 | 1.659139000  | 0.635840000  | -0.048385000 |
| 6 | 2.841408000  | 1.267781000  | 0.277955000  |
| 1 | 3.788200000  | 0.743267000  | 0.277013000  |
| 6 | 2.823045000  | 2.625269000  | 0.621155000  |
| 6 | 1.601508000  | 3.303512000  | 0.617902000  |
| 1 | 1.515649000  | 4.352912000  | 0.865938000  |
| 6 | 0.462638000  | 2.596765000  | 0.278207000  |
| 1 | -0.503244000 | 3.087110000  | 0.262847000  |
| 6 | 4.039680000  | 4.552234000  | 1.293359000  |
| 1 | 3.686238000  | 5.181067000  | 0.471248000  |
| 1 | 5.085814000  | 4.771916000  | 1.500217000  |
| 1 | 3.440194000  | 4.731669000  | 2.190172000  |
| 6 | -2.313381000 | 0.747110000  | 1.459648000  |
| 1 | -1.875916000 | 1.317989000  | 2.272143000  |
| 6 | -2.913808000 | 1.445079000  | 0.373040000  |
| 1 | -2.945300000 | 2.528517000  | 0.382890000  |
| 6 | -3.443759000 | 0.742236000  | -0.727364000 |
| 6 | -3.323862000 | -0.682609000 | -0.743990000 |
| 1 | -3.678385000 | -1.241775000 | -1.601424000 |
| 6 | -2.704015000 | -1.351759000 | 0.323756000  |
| 1 | -2.574402000 | -2.427041000 | 0.258097000  |
| 6 | -2.207654000 | -0.654465000 | 1.471227000  |
| 1 | -0.876141000 | 0.385986000  | -2.096982000 |
| 6 | -1.630928000 | -1.392809000 | 2.661071000  |
| 6 | -0.480597000 | -2.333849000 | 2.297006000  |
| 6 | -2.762445000 | -2.149001000 | 3.369759000  |
| 1 | -1.243780000 | -0.633117000 | 3.348426000  |
| 1 | 0.370161000  | -1.783039000 | 1.887168000  |
| 1 | -0.142363000 | -2.862342000 | 3.193198000  |

|   |              |              |              |
|---|--------------|--------------|--------------|
| 1 | -0.788911000 | -3.085755000 | 1.563535000  |
| 1 | -3.576500000 | -1.474427000 | 3.651151000  |
| 1 | -3.173412000 | -2.930428000 | 2.721084000  |
| 1 | -2.383815000 | -2.627550000 | 4.277608000  |
| 6 | -4.084555000 | 1.462426000  | -1.873000000 |
| 1 | -5.168730000 | 1.477219000  | -1.721279000 |
| 1 | -3.732433000 | 2.493620000  | -1.935024000 |
| 1 | -3.880799000 | 0.954620000  | -2.817842000 |
| 8 | -1.048529000 | 2.536586000  | -2.736805000 |
| 1 | -1.354560000 | 3.124191000  | -2.028691000 |
| 1 | -1.771317000 | 2.514224000  | -3.382907000 |
| 1 | -0.995205000 | 1.364416000  | -2.213084000 |

19

Coordinates (Angstroms)

|    | X            | Y            | Z            |
|----|--------------|--------------|--------------|
| 44 | -1.255857000 | -0.021981000 | -0.499445000 |
| 7  | 0.441146000  | -1.230296000 | -0.709565000 |
| 7  | 0.328455000  | 1.290897000  | -0.107803000 |
| 8  | 3.814941000  | -3.554729000 | -0.949364000 |
| 8  | 3.623446000  | 3.555637000  | 0.839906000  |
| 6  | 0.382928000  | -2.529088000 | -1.052197000 |
| 1  | -0.600086000 | -2.931763000 | -1.260808000 |
| 6  | 1.505335000  | -3.318272000 | -1.134769000 |
| 1  | 1.426607000  | -4.362975000 | -1.408030000 |
| 6  | 2.754915000  | -2.748133000 | -0.858880000 |
| 6  | 2.818047000  | -1.394400000 | -0.515485000 |
| 1  | 3.763287000  | -0.914848000 | -0.303335000 |
| 6  | 1.638654000  | -0.668880000 | -0.450948000 |
| 6  | 5.113624000  | -3.007015000 | -0.710151000 |
| 1  | 5.337148000  | -2.213348000 | -1.428657000 |
| 1  | 5.809974000  | -3.832459000 | -0.847807000 |
| 1  | 5.192914000  | -2.624805000 | 0.311556000  |
| 6  | 1.577468000  | 0.763076000  | -0.099571000 |
| 6  | 2.681742000  | 1.525321000  | 0.216455000  |
| 1  | 3.679194000  | 1.105081000  | 0.228437000  |
| 6  | 2.513125000  | 2.878863000  | 0.536585000  |
| 6  | 1.223948000  | 3.418432000  | 0.518729000  |
| 1  | 1.020229000  | 4.454710000  | 0.752224000  |
| 6  | 0.170177000  | 2.585949000  | 0.192118000  |
| 1  | -0.842260000 | 2.969282000  | 0.178276000  |
| 6  | 3.499312000  | 4.935314000  | 1.194757000  |
| 1  | 3.072865000  | 5.509895000  | 0.368150000  |
| 1  | 4.512234000  | 5.278595000  | 1.397547000  |

|   |              |              |              |
|---|--------------|--------------|--------------|
| 1 | 2.883951000  | 5.047915000  | 2.091687000  |
| 6 | -2.289316000 | 0.597724000  | 1.383945000  |
| 1 | -1.860404000 | 1.289581000  | 2.102120000  |
| 6 | -3.062036000 | 1.115704000  | 0.312654000  |
| 1 | -3.229389000 | 2.183715000  | 0.234636000  |
| 6 | -3.551139000 | 0.254660000  | -0.689589000 |
| 6 | -3.269300000 | -1.144151000 | -0.584039000 |
| 1 | -3.602396000 | -1.815102000 | -1.366913000 |
| 6 | -2.509146000 | -1.643458000 | 0.480267000  |
| 1 | -2.263609000 | -2.699735000 | 0.496517000  |
| 6 | -1.985430000 | -0.778600000 | 1.493679000  |
| 1 | -0.990707000 | -0.069887000 | -2.337526000 |
| 6 | -1.245227000 | -1.306860000 | 2.703108000  |
| 6 | -0.162538000 | -2.338204000 | 2.384651000  |
| 6 | -2.287956000 | -1.878340000 | 3.674525000  |
| 1 | -0.766018000 | -0.445571000 | 3.179935000  |
| 1 | 0.645053000  | -1.902167000 | 1.792274000  |
| 1 | 0.269226000  | -2.706924000 | 3.319510000  |
| 1 | -0.562452000 | -3.201978000 | 1.844148000  |
| 1 | -3.050673000 | -1.133913000 | 3.921286000  |
| 1 | -2.787181000 | -2.749603000 | 3.236358000  |
| 1 | -1.801996000 | -2.194516000 | 4.601824000  |
| 6 | -4.316162000 | 0.776756000  | -1.864250000 |
| 1 | -5.381929000 | 0.585331000  | -1.702770000 |
| 1 | -4.172069000 | 1.851271000  | -1.986439000 |
| 1 | -4.016206000 | 0.264262000  | -2.780528000 |
| 8 | -1.651557000 | 2.911802000  | -2.694569000 |
| 1 | -2.054713000 | 2.820508000  | -1.823958000 |
| 1 | -2.227536000 | 2.384598000  | -3.258960000 |
| 1 | -1.033355000 | 0.717722000  | -2.210961000 |

20

Coordinates (Angstroms)

|    | X            | Y            | Z            |
|----|--------------|--------------|--------------|
| 44 | -0.838723000 | -0.685242000 | -0.159610000 |
| 7  | 1.134970000  | -0.935230000 | -0.823683000 |
| 7  | 0.060593000  | 1.171844000  | 0.266658000  |
| 8  | 5.085878000  | -1.390144000 | -1.888218000 |
| 8  | 2.193045000  | 4.552709000  | 1.253828000  |
| 6  | 1.595718000  | -2.059069000 | -1.400056000 |
| 1  | 0.867367000  | -2.841044000 | -1.576545000 |
| 6  | 2.912994000  | -2.225242000 | -1.759252000 |
| 1  | 3.249146000  | -3.145417000 | -2.220782000 |
| 6  | 3.814713000  | -1.180364000 | -1.521943000 |

|   |              |              |              |
|---|--------------|--------------|--------------|
| 6 | 3.341097000  | -0.006457000 | -0.934048000 |
| 1 | 4.002228000  | 0.826302000  | -0.738037000 |
| 6 | 1.995127000  | 0.077732000  | -0.599636000 |
| 6 | 6.040084000  | -0.350157000 | -1.669284000 |
| 1 | 5.767066000  | 0.553500000  | -2.222258000 |
| 1 | 6.985847000  | -0.737070000 | -2.045627000 |
| 1 | 6.133620000  | -0.126025000 | -0.602652000 |
| 6 | 1.390861000  | 1.271337000  | 0.027077000  |
| 6 | 2.103709000  | 2.408182000  | 0.356440000  |
| 1 | 3.167304000  | 2.488318000  | 0.170940000  |
| 6 | 1.440801000  | 3.486473000  | 0.953037000  |
| 6 | 0.068111000  | 3.381860000  | 1.191931000  |
| 1 | -0.507442000 | 4.176660000  | 1.647001000  |
| 6 | -0.569253000 | 2.209173000  | 0.831384000  |
| 1 | -1.631023000 | 2.086208000  | 1.004189000  |
| 6 | 1.554523000  | 5.678462000  | 1.858242000  |
| 1 | 0.790355000  | 6.093242000  | 1.194441000  |
| 1 | 2.341626000  | 6.414286000  | 2.015518000  |
| 1 | 1.109312000  | 5.405221000  | 2.819306000  |
| 6 | -1.814011000 | -0.938355000 | 1.914266000  |
| 1 | -1.690754000 | -0.277169000 | 2.766453000  |
| 6 | -2.804943000 | -0.615647000 | 0.938547000  |
| 1 | -3.426410000 | 0.260871000  | 1.075485000  |
| 6 | -2.978299000 | -1.420919000 | -0.209204000 |
| 6 | -2.095467000 | -2.528247000 | -0.393974000 |
| 1 | -2.170975000 | -3.138960000 | -1.285524000 |
| 6 | -1.083054000 | -2.786163000 | 0.555374000  |
| 1 | -0.379246000 | -3.587863000 | 0.353255000  |
| 6 | -0.958315000 | -2.041106000 | 1.769226000  |
| 1 | -1.031823000 | -0.138013000 | -1.659194000 |
| 6 | 0.081203000  | -2.397368000 | 2.811901000  |
| 6 | 1.509580000  | -2.335117000 | 2.260444000  |
| 6 | -0.220043000 | -3.778160000 | 3.406991000  |
| 1 | -0.004476000 | -1.653153000 | 3.611318000  |
| 1 | 1.757447000  | -1.326088000 | 1.919143000  |
| 1 | 2.223472000  | -2.617306000 | 3.040317000  |
| 1 | 1.644976000  | -3.023095000 | 1.418857000  |
| 1 | -1.230157000 | -3.821757000 | 3.825333000  |
| 1 | -0.133804000 | -4.559326000 | 2.643481000  |
| 1 | 0.491623000  | -4.008813000 | 4.205353000  |
| 6 | -4.056044000 | -1.126701000 | -1.208907000 |
| 1 | -4.948500000 | -1.710153000 | -0.960247000 |
| 1 | -4.325398000 | -0.069070000 | -1.194776000 |
| 1 | -3.740349000 | -1.401888000 | -2.217598000 |

|   |              |             |              |
|---|--------------|-------------|--------------|
| 8 | -2.598855000 | 1.896832000 | -1.767074000 |
| 1 | -3.254154000 | 2.110990000 | -1.007126000 |
| 1 | -3.143703000 | 1.615357000 | -2.600587000 |
| 1 | -2.047044000 | 1.118819000 | -1.499227000 |
| 8 | -3.911253000 | 1.213626000 | -3.808048000 |
| 1 | -4.512148000 | 1.931835000 | -4.043708000 |
| 1 | -4.490444000 | 0.483114000 | -3.556185000 |
| 8 | -4.284027000 | 2.520447000 | 0.027563000  |
| 1 | -3.889444000 | 2.608095000 | 0.903902000  |
| 1 | -4.932070000 | 1.811112000 | 0.122063000  |

**TS20-21**

Coordinates (Angstroms)

|    | X            | Y            | Z            |
|----|--------------|--------------|--------------|
| 44 | -0.891518000 | -0.638629000 | -0.128669000 |
| 7  | 1.057900000  | -0.958219000 | -0.835319000 |
| 7  | 0.086805000  | 1.158468000  | 0.307117000  |
| 8  | 4.989682000  | -1.622051000 | -1.830700000 |
| 8  | 2.259602000  | 4.567020000  | 1.031300000  |
| 6  | 1.461997000  | -2.104785000 | -1.408713000 |
| 1  | 0.695758000  | -2.846230000 | -1.597273000 |
| 6  | 2.773920000  | -2.339239000 | -1.748027000 |
| 1  | 3.066596000  | -3.274298000 | -2.208996000 |
| 6  | 3.727425000  | -1.346743000 | -1.488260000 |
| 6  | 3.309074000  | -0.149341000 | -0.901619000 |
| 1  | 4.013670000  | 0.639853000  | -0.679468000 |
| 6  | 1.965820000  | 0.009066000  | -0.595270000 |
| 6  | 5.989992000  | -0.624311000 | -1.613608000 |
| 1  | 5.757460000  | 0.288356000  | -2.169741000 |
| 1  | 6.917468000  | -1.054778000 | -1.987490000 |
| 1  | 6.092042000  | -0.402962000 | -0.547351000 |
| 6  | 1.407601000  | 1.232302000  | 0.015423000  |
| 6  | 2.135003000  | 2.378965000  | 0.258924000  |
| 1  | 3.187739000  | 2.449740000  | 0.016669000  |
| 6  | 1.495176000  | 3.490986000  | 0.821788000  |
| 6  | 0.130769000  | 3.408381000  | 1.113991000  |
| 1  | -0.424813000 | 4.231278000  | 1.543025000  |
| 6  | -0.525785000 | 2.224825000  | 0.834371000  |
| 1  | -1.585371000 | 2.120393000  | 1.033278000  |
| 6  | 1.647656000  | 5.735820000  | 1.580675000  |
| 1  | 0.857405000  | 6.104985000  | 0.920802000  |
| 1  | 2.441792000  | 6.477198000  | 1.651189000  |
| 1  | 1.242492000  | 5.532281000  | 2.575821000  |
| 6  | -1.819885000 | -0.783940000 | 1.924091000  |

|   |              |              |              |
|---|--------------|--------------|--------------|
| 1 | -1.664451000 | -0.058751000 | 2.716741000  |
| 6 | -2.859135000 | -0.559822000 | 0.989022000  |
| 1 | -3.489636000 | 0.314223000  | 1.084169000  |
| 6 | -3.024808000 | -1.427542000 | -0.118027000 |
| 6 | -2.139478000 | -2.536174000 | -0.254450000 |
| 1 | -2.225092000 | -3.193502000 | -1.111042000 |
| 6 | -1.105134000 | -2.732829000 | 0.680403000  |
| 1 | -0.397918000 | -3.537294000 | 0.506480000  |
| 6 | -0.917268000 | -1.866351000 | 1.796844000  |
| 1 | -1.075150000 | -0.116140000 | -1.753772000 |
| 6 | 0.155731000  | -2.119399000 | 2.835264000  |
| 6 | 1.554512000  | -2.289733000 | 2.237552000  |
| 6 | -0.243795000 | -3.338733000 | 3.676576000  |
| 1 | 0.172025000  | -1.242142000 | 3.491016000  |
| 1 | 1.884271000  | -1.376972000 | 1.734478000  |
| 1 | 2.268861000  | -2.513256000 | 3.035288000  |
| 1 | 1.594390000  | -3.113635000 | 1.517401000  |
| 1 | -1.231525000 | -3.204957000 | 4.127886000  |
| 1 | -0.267823000 | -4.245413000 | 3.061726000  |
| 1 | 0.481729000  | -3.494110000 | 4.480541000  |
| 6 | -4.082591000 | -1.156602000 | -1.141305000 |
| 1 | -5.032284000 | -1.575925000 | -0.794403000 |
| 1 | -4.214153000 | -0.082666000 | -1.286870000 |
| 1 | -3.829564000 | -1.622638000 | -2.095726000 |
| 8 | -2.307152000 | 1.853005000  | -1.889805000 |
| 1 | -2.924751000 | 2.060409000  | -1.152617000 |
| 1 | -2.890318000 | 1.562950000  | -2.632040000 |
| 1 | -1.557969000 | 0.623549000  | -1.571015000 |
| 8 | -3.913941000 | 1.005640000  | -3.907529000 |
| 1 | -4.768005000 | 1.415547000  | -3.727731000 |
| 1 | -4.060280000 | 0.072891000  | -3.712662000 |
| 8 | -4.191833000 | 2.536222000  | -0.022699000 |
| 1 | -3.880290000 | 2.578996000  | 0.888487000  |
| 1 | -4.852113000 | 1.833452000  | -0.016338000 |

21

Coordinates (Angstroms)

|    | X            | Y            | Z            |
|----|--------------|--------------|--------------|
| 44 | -0.830657000 | -0.709729000 | -0.142236000 |
| 7  | 1.137188000  | -0.918650000 | -0.816763000 |
| 7  | 0.007475000  | 1.173845000  | 0.208635000  |
| 8  | 5.086835000  | -1.336057000 | -1.850545000 |
| 8  | 1.993898000  | 4.667422000  | 1.049008000  |
| 6  | 1.608541000  | -2.047565000 | -1.373163000 |

|   |              |              |              |
|---|--------------|--------------|--------------|
| 1 | 0.890481000  | -2.842197000 | -1.533127000 |
| 6 | 2.928308000  | -2.197546000 | -1.726464000 |
| 1 | 3.280249000  | -3.119168000 | -2.172565000 |
| 6 | 3.814572000  | -1.136527000 | -1.498377000 |
| 6 | 3.322991000  | 0.044053000  | -0.932609000 |
| 1 | 3.972070000  | 0.888772000  | -0.746350000 |
| 6 | 1.976720000  | 0.115242000  | -0.609643000 |
| 6 | 6.033766000  | -0.286730000 | -1.635111000 |
| 1 | 5.760271000  | 0.607022000  | -2.203207000 |
| 1 | 6.984596000  | -0.674367000 | -1.997048000 |
| 1 | 6.113715000  | -0.050133000 | -0.570431000 |
| 6 | 1.335708000  | 1.309592000  | -0.025254000 |
| 6 | 1.999874000  | 2.484548000  | 0.253954000  |
| 1 | 3.060934000  | 2.596349000  | 0.072145000  |
| 6 | 1.285626000  | 3.566398000  | 0.787014000  |
| 6 | -0.088557000 | 3.426316000  | 1.000395000  |
| 1 | -0.702679000 | 4.224857000  | 1.394196000  |
| 6 | -0.678945000 | 2.214600000  | 0.694890000  |
| 1 | -1.741135000 | 2.066054000  | 0.845392000  |
| 6 | 1.315066000  | 5.797187000  | 1.603074000  |
| 1 | 0.555067000  | 6.168591000  | 0.909955000  |
| 1 | 2.081427000  | 6.556616000  | 1.749203000  |
| 1 | 0.858677000  | 5.543799000  | 2.564045000  |
| 6 | -1.644652000 | -0.819250000 | 1.944989000  |
| 1 | -1.459144000 | -0.068467000 | 2.706309000  |
| 6 | -2.746618000 | -0.650363000 | 1.070070000  |
| 1 | -3.392595000 | 0.211268000  | 1.175363000  |
| 6 | -2.952893000 | -1.554972000 | 0.006995000  |
| 6 | -2.049918000 | -2.654171000 | -0.146315000 |
| 1 | -2.171899000 | -3.335651000 | -0.979443000 |
| 6 | -0.961610000 | -2.802467000 | 0.724088000  |
| 1 | -0.250153000 | -3.600216000 | 0.538694000  |
| 6 | -0.722145000 | -1.879334000 | 1.790837000  |
| 1 | -0.988308000 | -0.424495000 | -1.956143000 |
| 6 | 0.399391000  | -2.087424000 | 2.786719000  |
| 6 | 1.777146000  | -2.266835000 | 2.145899000  |
| 6 | 0.034971000  | -3.288430000 | 3.670731000  |
| 1 | 0.430984000  | -1.193501000 | 3.418483000  |
| 1 | 2.096599000  | -1.357906000 | 1.630256000  |
| 1 | 2.513056000  | -2.489351000 | 2.923817000  |
| 1 | 1.791728000  | -3.094194000 | 1.429116000  |
| 1 | -0.942428000 | -3.153608000 | 4.143525000  |
| 1 | 0.006928000  | -4.211641000 | 3.081358000  |
| 1 | 0.782942000  | -3.412904000 | 4.459105000  |



|   |              |              |              |
|---|--------------|--------------|--------------|
| 6 | -4.054733000 | -1.321512000 | -0.977712000 |
| 1 | -4.989885000 | -1.721644000 | -0.573378000 |
| 1 | -4.183545000 | -0.251664000 | -1.154630000 |
| 1 | -3.844442000 | -1.823379000 | -1.924161000 |
| 8 | -2.629942000 | 1.883242000  | -1.918982000 |
| 1 | -3.254890000 | 2.005359000  | -1.180125000 |
| 1 | -3.145218000 | 1.403630000  | -2.595095000 |
| 1 | -1.375352000 | 0.226734000  | -1.682249000 |
| 8 | -4.101839000 | 0.584779000  | -3.916339000 |
| 1 | -4.842515000 | 1.198298000  | -3.980481000 |
| 1 | -4.486431000 | -0.197279000 | -3.505510000 |
| 8 | -4.515038000 | 2.329407000  | 0.105372000  |
| 1 | -4.094530000 | 2.419047000  | 0.967908000  |
| 1 | -5.045253000 | 1.527864000  | 0.182215000  |

22

Coordinates (Angstroms)

|    | X            | Y            | Z            |
|----|--------------|--------------|--------------|
| 44 | -0.721382000 | 1.130978000  | -0.523772000 |
| 7  | 0.403184000  | 0.713689000  | 1.196774000  |
| 7  | 1.125082000  | 0.490628000  | -1.296508000 |
| 8  | 2.780609000  | 0.019624000  | 4.489988000  |
| 8  | 4.890802000  | -0.715570000 | -2.451526000 |
| 6  | -0.075560000 | 0.777593000  | 2.451764000  |
| 1  | -1.125542000 | 1.023118000  | 2.554281000  |
| 6  | 0.704174000  | 0.544970000  | 3.561596000  |
| 1  | 0.280658000  | 0.605760000  | 4.556426000  |
| 6  | 2.056965000  | 0.232686000  | 3.381226000  |
| 6  | 2.558701000  | 0.152492000  | 2.082799000  |
| 1  | 3.592807000  | -0.102075000 | 1.899402000  |
| 6  | 1.698116000  | 0.388146000  | 1.017026000  |
| 6  | 4.158182000  | -0.323044000 | 4.338267000  |
| 1  | 4.266790000  | -1.259155000 | 3.782102000  |
| 1  | 4.544907000  | -0.451396000 | 5.348155000  |
| 1  | 4.706087000  | 0.479514000  | 3.835441000  |
| 6  | 2.108843000  | 0.253217000  | -0.394476000 |
| 6  | 3.375891000  | -0.132839000 | -0.786321000 |
| 1  | 4.161544000  | -0.327855000 | -0.068007000 |
| 6  | 3.648401000  | -0.315648000 | -2.145223000 |
| 6  | 2.627363000  | -0.092812000 | -3.070802000 |
| 1  | 2.765502000  | -0.227282000 | -4.135246000 |
| 6  | 1.390522000  | 0.306407000  | -2.595071000 |
| 1  | 0.572512000  | 0.487806000  | -3.281672000 |
| 6  | 5.211590000  | -0.912337000 | -3.828925000 |

|   |              |              |              |
|---|--------------|--------------|--------------|
| 1 | 4.586845000  | -1.697192000 | -4.265488000 |
| 1 | 6.255093000  | -1.222852000 | -3.847391000 |
| 1 | 5.093905000  | 0.018724000  | -4.390850000 |
| 6 | -0.941888000 | 3.138456000  | -1.711546000 |
| 1 | -0.191597000 | 3.659816000  | -2.297465000 |
| 6 | -1.676526000 | 2.071759000  | -2.324534000 |
| 1 | -1.474577000 | 1.814011000  | -3.358274000 |
| 6 | -2.659047000 | 1.353299000  | -1.611629000 |
| 6 | -2.851729000 | 1.676648000  | -0.228954000 |
| 1 | -3.567833000 | 1.119478000  | 0.363417000  |
| 6 | -2.056529000 | 2.671258000  | 0.375480000  |
| 1 | -2.172675000 | 2.846295000  | 1.440414000  |
| 6 | -1.129029000 | 3.476206000  | -0.369619000 |
| 1 | -1.025815000 | -0.418240000 | -0.463590000 |
| 6 | -0.370219000 | 4.608613000  | 0.288710000  |
| 6 | 0.430539000  | 4.148470000  | 1.510705000  |
| 6 | -1.338788000 | 5.739727000  | 0.656258000  |
| 1 | 0.338537000  | 4.991846000  | -0.454028000 |
| 1 | 1.164228000  | 3.384566000  | 1.236989000  |
| 1 | 0.964286000  | 4.997806000  | 1.947987000  |
| 1 | -0.222441000 | 3.731806000  | 2.285083000  |
| 1 | -1.887192000 | 6.093407000  | -0.222050000 |
| 1 | -2.068249000 | 5.401178000  | 1.400467000  |
| 1 | -0.791765000 | 6.586575000  | 1.081646000  |
| 6 | -3.461945000 | 0.264900000  | -2.261977000 |
| 1 | -4.436324000 | 0.656805000  | -2.572467000 |
| 1 | -2.950787000 | -0.122105000 | -3.146128000 |
| 1 | -3.630689000 | -0.558969000 | -1.565521000 |
| 6 | 2.224836000  | -3.108494000 | 1.140072000  |
| 6 | 0.853067000  | -2.899158000 | 1.246107000  |
| 6 | 0.051772000  | -2.910175000 | 0.098729000  |
| 6 | 0.644277000  | -3.109394000 | -1.156601000 |
| 6 | 2.013740000  | -3.302048000 | -1.259994000 |
| 6 | 2.804910000  | -3.307667000 | -0.109487000 |
| 1 | 2.840290000  | -3.102576000 | 2.033825000  |
| 1 | 0.415377000  | -2.732428000 | 2.224750000  |
| 1 | 0.022192000  | -3.103407000 | -2.045087000 |
| 1 | 2.470429000  | -3.440606000 | -2.234457000 |
| 1 | 3.876681000  | -3.456929000 | -0.192945000 |
| 6 | -1.418580000 | -2.722165000 | 0.177808000  |
| 8 | -2.109909000 | -2.931362000 | -0.827392000 |
| 6 | -2.049708000 | -2.321048000 | 1.477630000  |
| 1 | -2.073366000 | -3.190895000 | 2.143652000  |
| 1 | -1.474093000 | -1.537452000 | 1.973579000  |

|   |              |              |              |
|---|--------------|--------------|--------------|
| 1 | -3.068411000 | -1.973480000 | 1.311466000  |
| 8 | -4.670336000 | -2.926648000 | -0.576015000 |
| 1 | -4.808040000 | -3.649896000 | 0.136270000  |
| 1 | -3.666487000 | -2.866101000 | -0.712430000 |
| 1 | -4.975718000 | -2.043127000 | -0.177627000 |
| 8 | -4.895979000 | -4.711652000 | 1.226617000  |
| 1 | -4.891955000 | -5.578152000 | 0.801856000  |
| 1 | -5.760681000 | -4.653538000 | 1.650851000  |
| 8 | -5.375123000 | -0.688877000 | 0.479360000  |
| 1 | -6.203746000 | -0.776008000 | 0.966009000  |
| 1 | -5.562269000 | -0.052244000 | -0.221631000 |

**TS22-23**

Coordinates (Angstroms)

|    | X            | Y            | Z            |
|----|--------------|--------------|--------------|
| 44 | 0.898541000  | 0.658793000  | 0.558901000  |
| 7  | -0.618969000 | 1.211583000  | -0.762697000 |
| 7  | -0.789765000 | -0.290624000 | 1.348248000  |
| 8  | -3.722740000 | 2.331648000  | -3.223858000 |
| 8  | -4.317107000 | -1.942134000 | 2.678653000  |
| 6  | -0.420566000 | 1.931091000  | -1.881598000 |
| 1  | 0.604947000  | 2.200442000  | -2.102301000 |
| 6  | -1.446413000 | 2.306044000  | -2.717060000 |
| 1  | -1.247203000 | 2.875806000  | -3.616172000 |
| 6  | -2.756969000 | 1.940759000  | -2.382582000 |
| 6  | -2.970497000 | 1.196163000  | -1.222619000 |
| 1  | -3.963526000 | 0.880186000  | -0.934909000 |
| 6  | -1.874041000 | 0.832995000  | -0.451114000 |
| 6  | -5.067834000 | 1.945383000  | -2.939489000 |
| 1  | -5.164157000 | 0.855624000  | -2.914969000 |
| 1  | -5.666835000 | 2.347269000  | -3.755090000 |
| 1  | -5.404488000 | 2.374963000  | -1.991470000 |
| 6  | -1.973151000 | -0.032875000 | 0.740189000  |
| 6  | -3.155687000 | -0.583479000 | 1.191072000  |
| 1  | -4.100133000 | -0.388401000 | 0.699977000  |
| 6  | -3.135834000 | -1.439094000 | 2.297974000  |
| 6  | -1.912495000 | -1.716045000 | 2.911117000  |
| 1  | -1.823332000 | -2.379587000 | 3.760721000  |
| 6  | -0.774358000 | -1.120520000 | 2.397733000  |
| 1  | 0.193625000  | -1.312567000 | 2.844025000  |
| 6  | -4.343853000 | -2.813903000 | 3.809739000  |
| 1  | -3.770722000 | -3.724436000 | 3.612023000  |
| 1  | -5.392304000 | -3.065201000 | 3.961999000  |
| 1  | -3.954646000 | -2.310252000 | 4.699131000  |

|   |              |              |              |
|---|--------------|--------------|--------------|
| 6 | 1.543087000  | 1.729441000  | 2.497985000  |
| 1 | 0.962993000  | 1.837418000  | 3.408550000  |
| 6 | 2.317485000  | 0.544407000  | 2.308688000  |
| 1 | 2.320581000  | -0.219958000 | 3.077436000  |
| 6 | 3.067649000  | 0.347904000  | 1.134525000  |
| 6 | 2.981484000  | 1.340737000  | 0.104136000  |
| 1 | 3.504147000  | 1.190412000  | -0.833603000 |
| 6 | 2.171731000  | 2.476102000  | 0.285472000  |
| 1 | 2.078506000  | 3.186674000  | -0.529477000 |
| 6 | 1.473292000  | 2.724929000  | 1.513930000  |
| 1 | 0.980073000  | -0.659482000 | -0.422776000 |
| 6 | 0.693110000  | 4.004086000  | 1.734946000  |
| 6 | -0.407180000 | 4.227314000  | 0.694030000  |
| 6 | 1.663937000  | 5.191541000  | 1.771628000  |
| 1 | 0.218058000  | 3.917901000  | 2.718134000  |
| 1 | -1.145833000 | 3.421228000  | 0.715537000  |
| 1 | -0.923530000 | 5.170029000  | 0.899227000  |
| 1 | 0.005479000  | 4.289257000  | -0.318385000 |
| 1 | 2.446167000  | 5.046020000  | 2.522873000  |
| 1 | 2.146180000  | 5.330411000  | 0.797715000  |
| 1 | 1.125046000  | 6.112148000  | 2.014828000  |
| 6 | 3.913568000  | -0.872787000 | 0.954696000  |
| 1 | 4.954551000  | -0.634571000 | 1.199382000  |
| 1 | 3.582897000  | -1.679670000 | 1.612237000  |
| 1 | 3.883855000  | -1.221295000 | -0.075869000 |
| 6 | -2.734237000 | -2.104849000 | -2.116283000 |
| 6 | -1.404900000 | -1.713376000 | -2.244968000 |
| 6 | -0.434454000 | -2.242797000 | -1.388343000 |
| 6 | -0.812599000 | -3.151847000 | -0.389170000 |
| 6 | -2.140221000 | -3.527618000 | -0.257428000 |
| 6 | -3.103686000 | -3.007346000 | -1.124482000 |
| 1 | -3.480483000 | -1.692003000 | -2.787068000 |
| 1 | -1.137309000 | -0.998796000 | -3.015371000 |
| 1 | -0.063531000 | -3.551025000 | 0.285624000  |
| 1 | -2.430215000 | -4.220765000 | 0.525117000  |
| 1 | -4.142911000 | -3.300676000 | -1.016686000 |
| 6 | 0.995525000  | -1.898461000 | -1.554545000 |
| 8 | 1.828865000  | -2.741465000 | -1.040636000 |
| 6 | 1.467435000  | -1.041364000 | -2.689457000 |
| 1 | 1.493965000  | -1.672102000 | -3.586145000 |
| 1 | 0.804334000  | -0.199484000 | -2.872678000 |
| 1 | 2.473499000  | -0.671371000 | -2.491824000 |
| 8 | 4.143032000  | -2.765112000 | -1.947254000 |
| 1 | 4.698607000  | -3.085000000 | -1.197857000 |

|       |             |              |              |
|-------|-------------|--------------|--------------|
| 1     | 2.810096000 | -2.672875000 | -1.419701000 |
| 1     | 4.473576000 | -1.858215000 | -2.139024000 |
| 8     | 5.568772000 | -3.591215000 | 0.218324000  |
| 1     | 6.058717000 | -2.806018000 | 0.490083000  |
| 1     | 4.872242000 | -3.667259000 | 0.881235000  |
| 8     | 4.977727000 | -0.189447000 | -2.295220000 |
| 1     | 5.650120000 | -0.094428000 | -2.979522000 |
| 1     | 5.449878000 | -0.037383000 | -1.467859000 |
| ----- |             |              |              |
